# Supplementary material for: A universal method for automated gene mapping
Source: PubMed Central journal article supplement (PMC551539; doi:10.1186/gb-2005-6-2-r19), 2005-01-17

**Supplementary Figure 1:** Proof-of-principle for chromosomal linkage with 3 known mutations on chromosome 2. Assays used to assess linkage were ZH1-01, ZH2-01, ZH3-05a, ZH4-03, ZH5-01 and ZHX-02.

---

***let-23***

Genetic Position: 1.06

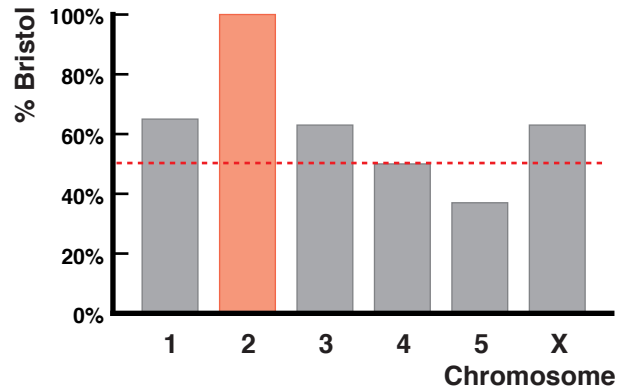

---

***rol-1***

Genetic Position: 6.99

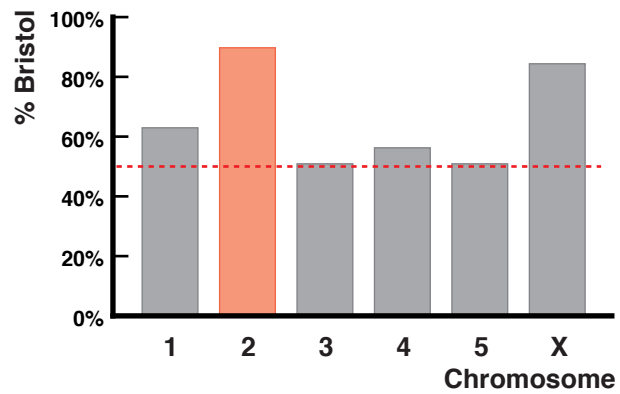

---

***unc-52***

Genetic Position: 23.31

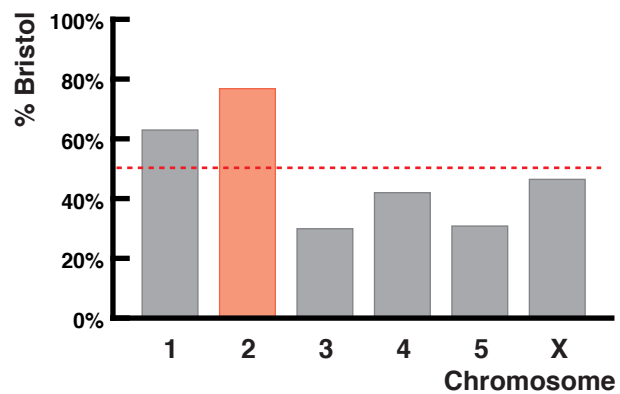

Supplement: gb-2005-6-2-r19-s2.pdf [file gb-2005-6-2-r19-s2.pdf]
