# Supplementary material for: A universal method for automated gene mapping
Source: PubMed Central journal article supplement (PMC551539; doi:10.1186/gb-2005-6-2-r19), 2005-01-17

## Supplementary Figure 5: *C. elegans* FLP Mapping Flow Chart

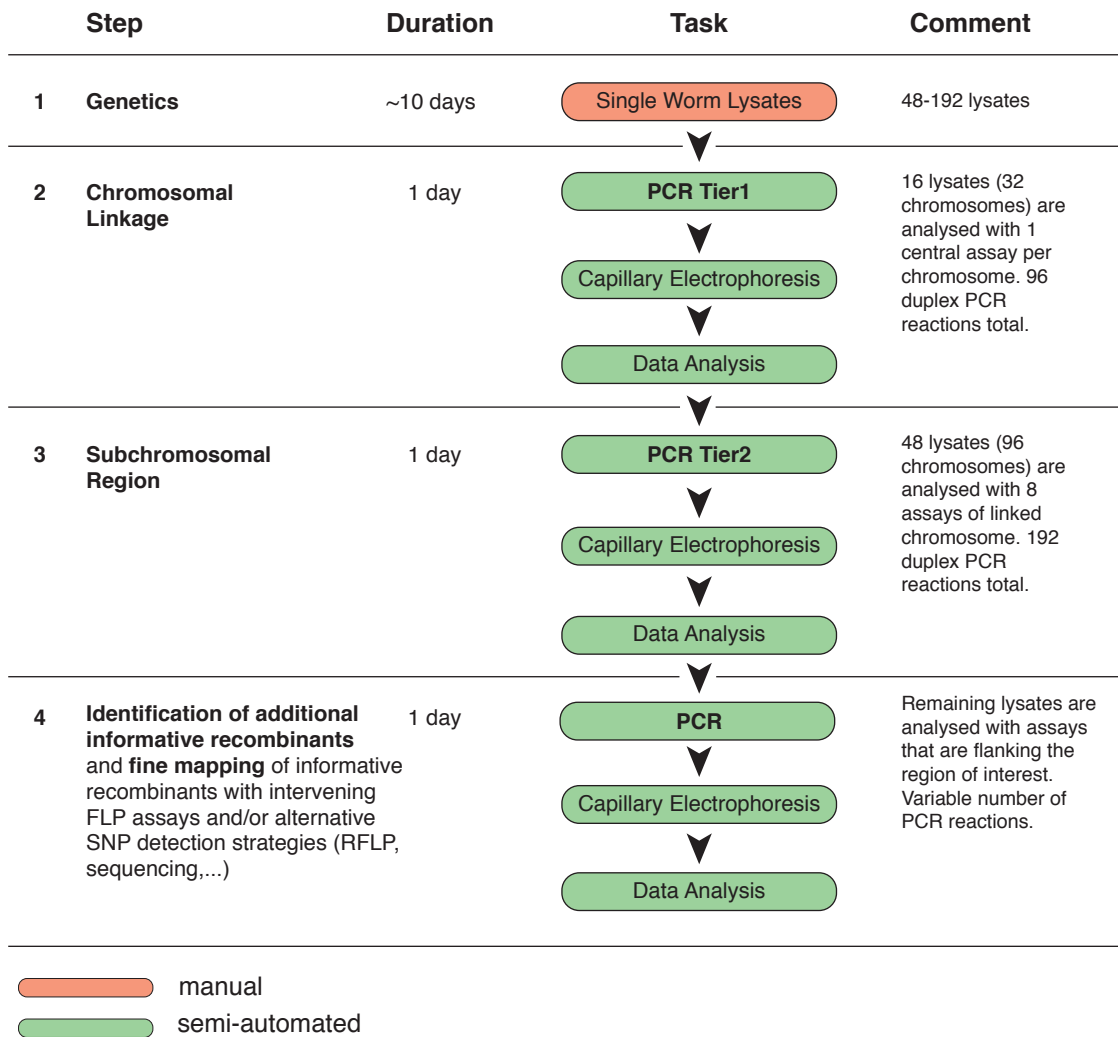

Supplement: gb-2005-6-2-r19-s6.pdf [file gb-2005-6-2-r19-s6.pdf]
