# Supplementary material for: A universal method for automated gene mapping
Source: PubMed Central journal article supplement (PMC551539; doi:10.1186/gb-2005-6-2-r19), 2005-01-17
Supplement: gb-2005-6-2-r19-s7.pdf [file gb-2005-6-2-r19-s7.pdf]

**Supplementary Figure 6: *Drosophila* FLP Mapping Flow Chart**

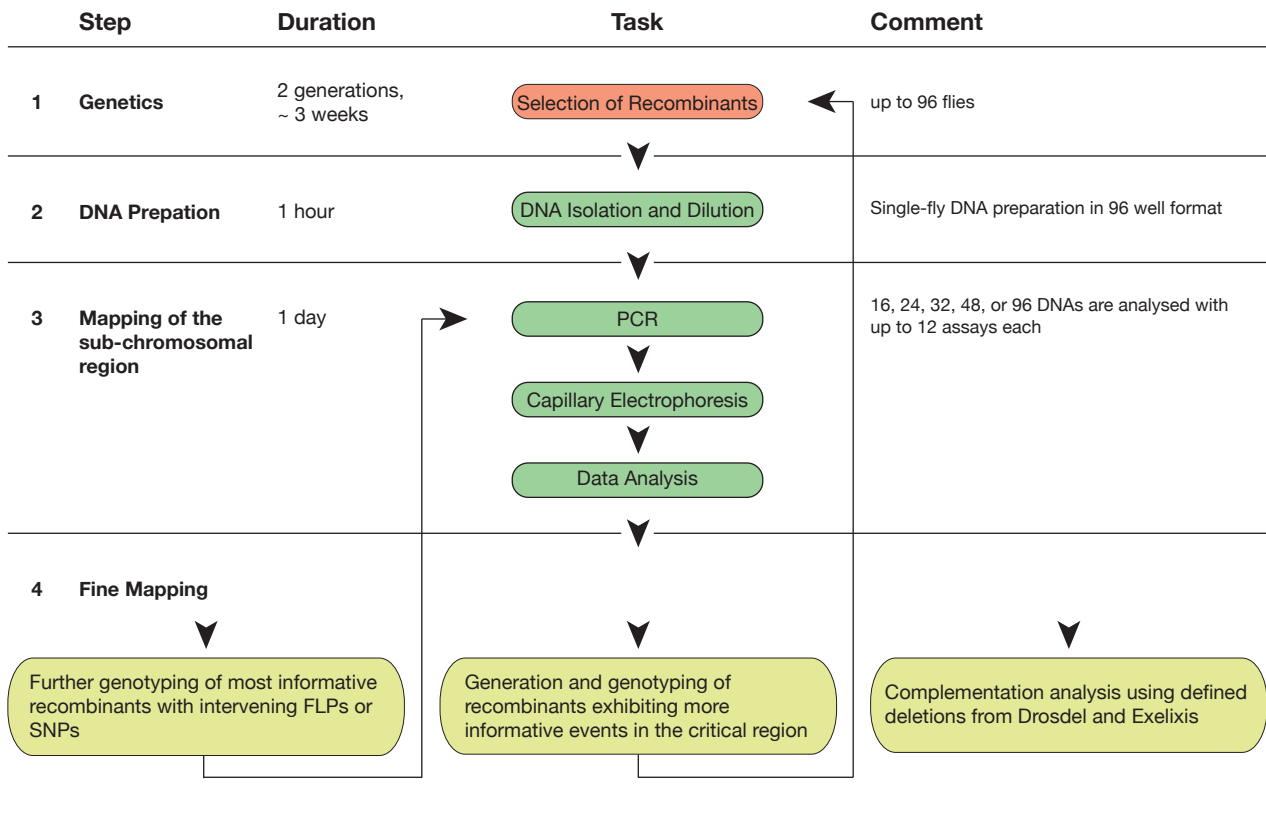

- manual
- semi-automated
- further - not mutually exclusive - mapping strategies
