# Supplementary material for: A universal method for automated gene mapping
Source: PubMed Central journal article supplement (PMC551539; doi:10.1186/gb-2005-6-2-r19), 2005-01-17

## Supplementary Figure 7: Accuracy of Allele Calling

### *C. elegans* ZH5-16

genotype: Bristol  
FLP: ZH5-16  
allele length: 112 bp

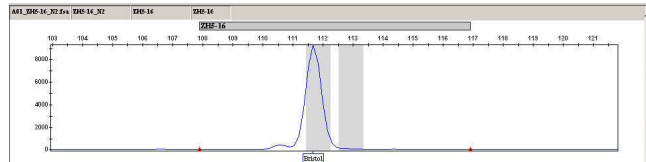

genotype: Hawaii  
FLP: ZH5-16  
allele length: 113 bp

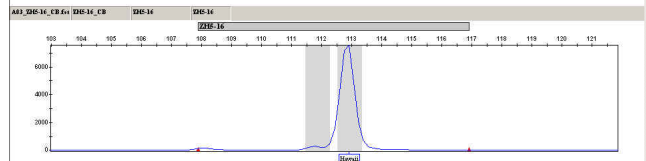

genotype: Bristol/Hawaii  
FLP: ZH5-16  
allele length: 112/113 bp

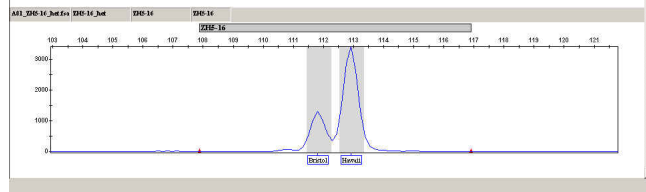

### *Drosophila* 2R090

genotype: EP2R  
FLP: 2R090  
allele length: 127 bp

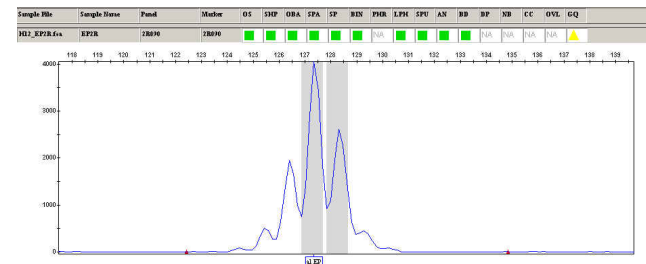

genotype: FRT2R  
FLP: 2R090  
allele length: 128 bp

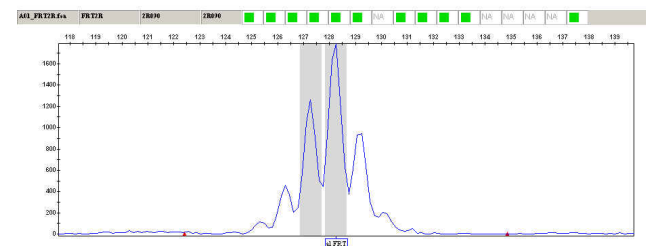

Supplement: gb-2005-6-2-r19-s8.pdf [file gb-2005-6-2-r19-s8.pdf]
