# Supplementary material for: A universal method for automated gene mapping
Source: PubMed Central journal article supplement (PMC551539; doi:10.1186/gb-2005-6-2-r19), 2005-01-17
Supplement: gb-2005-6-2-r19-s9.pdf [file gb-2005-6-2-r19-s9.pdf]

Supplementary Table 1: Verified *C. elegans* FLP Assays

| Chromosome | Assay Name      | WormBase SNP    | Position on Chromosome (nt) | Distance to next FLP Assay LEFT (kb) | Distance to next FLP Assay RIGHT (kb) | Oligo fwd                 | Oligo rev                 | Length Bristol (nt) | Length Hawaii (nt) | Change | GeneModels LEFT | GeneModels RIGHT |
|------------|-----------------|-----------------|-----------------------------|--------------------------------------|---------------------------------------|---------------------------|---------------------------|---------------------|--------------------|--------|-----------------|------------------|
| I          | ZH1-16          | pkP1099         | 470031                      | 470.0                                | 568.2                                 | TTCTCGTGCAGTGGAAATGT      | TCGGAGCGTGTTCGATGTATG     | 444                 | 453                | I9     | 81              | 90               |
|            | ZH1-17          | snp_Y34D9[1]    | 1038236                     | 568.2                                | 686.7                                 | TTTTTCAGATTTTTTGTGAAAGC   | CGCCTTAAAGGTTACTGTAGC     | 114                 | 115                | I1     | 90              | 80               |
|            | ZH1-10a         | snp_Y71G12[15]  | 1724899                     | 686.7                                | 546.2                                 | TTCAAAAAAGTGGAAAACTGAGTT  | CACTGGGTCTCTGTATCAACGTT   | 142                 | 148                | I6     | 80              | 79               |
|            | ZH1-25          | snp_Y39G10AL[1] | 2271065                     | 546.2                                | 392.1                                 | TTGGTACCGAGTCAACACGA      | ATTTCTGCCGAGTCACTACT      | 158                 | 157                | D1     | 79              | 84               |
|            | ZH1-07          | snp_F40E3[4]    | 2663170                     | 392.1                                | 460.7                                 | AGTAGAGTCTAACACACTATT     | CTACAATGTAGTTCGCAATCT     | 132                 | 130                | D2     | 84              | 93               |
|            | ZH1-18a         | snp_K09H9[2]    | 3123875                     | 460.7                                | 1433.3                                | AATATTTGATTTGGATCGTGC     | TTAGAAGTAAATTTGCAGTACCA   | 240                 | 235                | D5     | 93              | 315              |
|            | ZH1-03          | snp_Y119C18[8]  | 4557221                     | 1433.3                               | 279.9                                 | GACCCGACTGCCGTTCTAT       | CTGCGTCTCCCTATGTTCG       | 117                 | 111                | D6     | 315             | 74               |
|            | ZH1-27          | snp_F57C9[1]    | 4837079                     | 279.9                                | 2607.6                                | CACAGAAGTTTCAAGTTACAG     | AAATTTGAGGTGATTTTTCTCAT   | 222                 | 223                | I1     | 74              | 731              |
|            | ZH1-34          | snp_ZK524[2]    | 7444723                     | 2607.6                               | 271.0                                 | GAAAAACAATCGTACATAAAC     | GCCTACACAGAAAGTATAGG      | 191                 | 192                | I1     | 731             | 62               |
|            | ZH1-21          | snp_F27D4[1]    | 7715727                     | 271.0                                | 701.2                                 | CAAAATTTCCGCTCGGTGAT      | TTGGAAGATGGGGATGCACAA     | 176                 | 169                | D7     | 62              | 157              |
|            | ZH1-01          | snp_F02E9[1]    | 8416904                     | 701.2                                | 871.1                                 | TTTTGCGCTCAAATATGTGT      | TGCTTTAACCTATATTTTGAATGCG | 119                 | 122                | I3     | 157             | 229              |
|            | ZH1-22          | snp_F14B4[1]    | 9287981                     | 871.1                                | 511.7                                 | CTCGTTGTGAGACTTATGGAA     | TCCATATTTTTTGGCTTCTGAGA   | 109                 | 113                | I4     | 229             | 149              |
|            | ZH1-23          | snp_F26E4[4]    | 9799636                     | 511.7                                | 915.1                                 | ATCAAAATTTCTTTCGCTTAATGAT | TAGGTGATTCATTTTTGCGGGAA   | 201                 | 203                | I2     | 149             | 220              |
|            | ZH1-15          | snp_B0205[2]    | 10714726                    | 915.1                                | 616.5                                 | GGCATTTTTTGGTCAACATTT     | CGAAGACTTCTTAAAAGAGTGGCA  | 198                 | 194                | D4     | 220             | 130              |
|            | ZH1-05          | snp_H25P06[2]   | 11331205                    | 616.5                                | 966.3                                 | GAAATCGATTTCTCATTCAGTT    | GCCTTGAACCCGCTGGT         | 328                 | 348                | I20    | 130             | 233              |
|            | ZH1-08          | snp_F56H6[4]    | 12297522                    | 966.3                                | 533.5                                 | GGGGAAAGCAGATAGACTC       | CGCTTCCGAACACCACT         | 285                 | 292                | I7     | 233             | 156              |
|            | ZH1-09          | Y18D10[5]       | 12831064                    | 533.5                                | 689.4                                 | CATATCGAAAATCAATCCCCTA    | AGGAAAAATAGCTGACCGAAT     | 248                 | 244                | D4     | 156             | 153              |
|            | ZH1-06          | snp_Y87G2[5]    | 13520509                    | 689.4                                | 382.9                                 | TCAAGAAAAACGGTCAATATGCA   | CATTTGATCGCACATCGAACG     | 278                 | 286                | I8     | 153             | 67               |
|            | ZH1-24          | snp_Y71A12B[2]  | 13903448                    | 382.9                                | 1175.6                                | ATGCTGAGCCCTTCACTCACT     | ATTTATATCTGGAAGATATGCACTT | 217                 | 227                | I10    | 67              | 237              |
|            | ZH2-15          | snp_W07E6[7]    | 492112                      | 492.1                                | 459.6                                 | AAAAATTCAAATGCTGCTATGAA   | ATTTTTAGTTTTCAGCACACCTA   | 201                 | 205                | I4     | 131             | 126              |
|            | ZH2-04a         | snp_C32B5[2]    | 951699                      | 459.6                                | 1153.8                                | TAAAAGTAGCTCTTGCCATCA     | ATGACGATTTTCACTCGGAATCTAG | 274                 | 282                | I8     | 126             | 350              |
|            | ZH2-05          | snp_R52[2]      | 2105518                     | 1153.8                               | 664.2                                 | TTACTAGAAGTTTTGAAACCCA    | AAACTAGATTTGAACTCGCATT    | 155                 | 150                | D5     | 350             | 184              |
|            | ZH2-16          | np133           | 2769668                     | 664.2                                | 541.9                                 | AGTGATTTTCGATGCAAGTAGAA   | TTCTCAACTCTCCAACCTGT      | 204                 | 209                | I5     | 184             | 166              |
| ZH2-06a    | snp_F39E9[2]    | 3311548         | 541.9                       | 721.3                                | TAGCAGACCCCTCCGGA                     | CGCAGAGCAATCAATTTCA       | 298                       | 289                 | D9                 | 166    | 231             |                  |
| ZH2-07     | snp_K07D4[1]    | 4032873         | 721.3                       | 656.9                                | CCTCCGAGACTATGGTGAA                   | AATTAAGCAGGCTGTCTCAAT     | 206                       | 212                 | I6                 | 231    | 138             |                  |
| ZH2-17     | snp_F10G7[4]    | 4689731         | 656.9                       | 587.0                                | AATTAAGCAGGCTGCGGAT                   | CAAAACGAAGACTGCGGAT       | 208                       | 204                 | D4                 | 138    | 175             |                  |
| ZH2-13     | snp_C54A12[4]   | 5276767         | 587.0                       | 979.3                                | CGTTTATTTGGAACCTCCCTCAGA              | AGAGAAACGAAAATAACCCACGT   | 220                       | 217                 | D3                 | 175    | 318             |                  |
| ZH2-19     | snp_F13H8[2]    | 6256072         | 979.3                       | 1032.4                               | AAGAAGGTATAGACTAGCAAGA                | CAGTCTCTGTGTCGCTAGA       | 229                       | 235                 | I6                 | 318    | 319             |                  |
| ZH2-01     | snp_C30G12[2]   | 7288476         | 1032.4                      | 524.1                                | ATGCTCCAATATGTCATCTTTT                | TCTTAACCTACGGATTTGAGCAAT  | 136                       | 148                 | I12                | 319    | 149             |                  |
| ZH2-02     | snp_T05A6[1]    | 7812597         | 524.1                       | 799.4                                | CTGAGAGTACTATCAACATC                  | ATCTCTTCACTCAGCACACAT     | 255                       | 263                 | I8                 | 149    | 230             |                  |
| ZH2-20     | snp_F28C6[3]    | 8612029         | 799.4                       | 571.0                                | ACATTACACTAGGAAAGTAGGT                | TAGAAATCTGTCAACAAGGTT     | 240                       | 231                 | D9                 | 230    | 152             |                  |
| ZH2-25     | snp_T23G7[2]    | 9183058         | 571.0                       | 1344.6                               | AGGTCCTTCGGTGGTTCGA                   | GCCCAAGGCTTTCTGACAG       | 218                       | 219                 | I1                 | 152    | 362             |                  |
| ZH2-27     | snp_R166[4]     | 10527682        | 1344.6                      | 831.7                                | CCAGGAGAGTCCAGCCAT                    | CATTCAGTGATATCAGCAGTG     | 151                       | 157                 | I6                 | 362    | 191             |                  |
| ZH2-09     | snp_B0491[2]    | 11359409        | 831.7                       | 446.2                                | CGAGAAAATCTCAAGTTACA                  | GGAGAAAGGTGATATAGTCGAT    | 109                       | 101                 | D8                 | 191    | 119             |                  |
| ZH2-28     | snp_F43G6[3]    | 11805581        | 446.2                       | 825.0                                | AAAAATCCAAAGAACCCGAGA                 | CAATTAATCTGCTACGCTCA      | 177                       | 173                 | D4                 | 119    | 207             |                  |
| ZH2-10     | snp_Y38E10[3]   | 12630557        | 825.0                       | 876.7                                | GTGATATAAAGATGCTGGAT                  | ATCCCAGCAGTGGTGGC         | 125                       | 143                 | I18                | 207    | 164             |                  |
| ZH2-11     | snp_F54F11[3]   | 13507241        | 876.7                       | 537.9                                | TCATCCAGTTTGTCCATTTGAA                | CGGAGTTACAGGTGTTTTGTA     | 162                       | 154                 | D8                 | 164    | 125             |                  |
| ZH2-12     | snp_W01G7[2]    | 14045121        | 537.9                       | 489.0                                | CCAACCTATGAACGTGCCAA                  | GGGAGTTACAAGATTAGAA       | 201                       | 197                 | D4                 | 125    | 95              |                  |
| ZH2-23     | snp_C04H5[1]    | 14534168        | 489.0                       | 733.9                                | ACACTTTGTACCATTATTTGAA                | CAACGGTGACGTTTTTCAGAA     | 201                       | 210                 | I9                 | 95     | 124             |                  |
| ZH3-17a    | snp_Y55B1BM[1]  | 416788          | 416.8                       | 595.5                                | AGTGATATAGCTAGATACTTGG                | GTCTGCTAAATTTTAGCATACC    | 157                       | 160                 | I3                 | 87     | 143             |                  |
| ZH3-25     | snp_Y34F4[2]    | 1012306         | 595.5                       | 752.9                                | CGTCTGATGTTGCCACATTC                  | AGTTTGTATCTCGGAGACC       | 283                       | 287                 | I4                 | 143    | 176             |                  |
| ZH3-06     | snp_Y46E12[6]   | 1765177         | 752.9                       | 563.0                                | TACTGTAGTTAGTCAAGACTAT                | GGTGCAGTTACCATTTGAGAA     | 191                       | 192                 | I1                 | 176    | 94              |                  |
| ZH3-07     | snp_Y54F10BM[9] | 2328170         | 563.0                       | 633.7                                | ACATTTGGAGAGCTTTGAATCTT               | TTCCGTGATATTTTGGTGAA      | 112                       | 109                 | D3                 | 94     | 122             |                  |
| ZH3-08     | snp_H05C05[5]   | 2961870         | 633.7                       | 480.0                                | CGCGGGGTTAGAGGAAT                     | TTCCGAAAATGTTATAGCAAT     | 140                       | 137                 | D3                 | 122    | 98              |                  |
| ZH3-26     | snp_K01A11[3]   | 3441912         | 480.0                       | 863.7                                | AGATTTTCGAGTCTGTACAG                  | ATCGGTTTCTACTTTGATGAT     | 226                       | 224                 | D2                 | 98     | 178             |                  |
| ZH3-28     | snp_H38K22[1]   | 4305611         | 863.7                       | 516.5                                | TAATACCAAGATCACACAGAAC                | TTTCTCGGTACAACCGGA        | 184                       | 185                 | I1                 | 178    | 149             |                  |
| ZH3-15     | snp_F26A1[2]    | 4822073         | 516.5                       | 904.6                                | ACATTTGCGAGCAATTTCCCTGT               | CGCTCACTTTGTTGGGAAAAG     | 203                       | 202                 | D1                 | 149    | 279             |                  |
| ZH3-04     | snp_B0336[6]    | 5726718         | 904.6                       | 1533.5                               | ATCAGCAGAGAAATGTTTCCACA               | CGAAATGAAGTGGGATTTGAT     | 229                       | 232                 | I3                 | 279    | 451             |                  |
| ZH3-02     | snp_T21D11[2]   | 7260267         | 1533.5                      | 512.2                                | ACATCACTATCAAGTCAAGC                  | AAAGTGAAGAAATTTGCCAC      | 199                       | 202                 | I3                 | 451    | 109             |                  |
| ZH3-05a    | snp_ZK686[3]    | 7772487         | 512.2                       | 918.9                                | CACTGAGGAGCAGCATTTT                   | AATGAGATCAAGAAATGAGCAA    | 176                       | 178                 | I2                 | 109    | 260             |                  |
| ZH3-32     | snp_F22B7[1]    | 8691426         | 918.9                       | 329.7                                | TATTTGCCACGGTGTAAACAC                 | TATCTACAAGGACAGAGCAA      | 184                       | 186                 | I2                 | 260    | 101             |                  |
| ZH3-35     | snp_F59B2[1]    | 9021169         | 329.7                       | 1032.9                               | GAAAACAAGTAACTAATGCTGC                | AAGAAGTTTCAATGATTAAGGAC   | 252                       | 253                 | I1                 | 101    | 270             |                  |
| ZH3-10a    | snp_T16G12[2]   | 10054064        | 1032.9                      | 658.4                                | GAATTTCCGCCATTTTGGCTA                 | GTGGTGAACCGTGGAGAGACT     | 147                       | 143                 | D4                 | 270    | 155             |                  |
| ZH3-23     | snp_W09D10[3]   | 10712445        | 658.4                       | 686.8                                | CGGTCAGTCCAGAGCAT                     | TATGCAATGCAATTAATAATGTC   | 124                       | 125                 | I1                 | 155    | 127             |                  |
| ZH3-11     | snp_Y47D3B[3]   | 11399237        | 686.8                       | 561.8                                | TCAACCTAGATCAAGCCGAA                  | CAACGTAGTCCGCTTACA        | 124                       | 126                 | I2                 | 127    | 104             |                  |
| ZH3-12     | snp_Y56A3[16]   | 11961081        | 561.8                       | 567.1                                | AAATTCCTGAAAACCCGAA                   | CAAGTATTTGGTAAATGCCAA     | 196                       | 202                 | I6                 | 104    | 90              |                  |
| ZH3-13     | snp_Y111B2[7]   | 12528166        | 567.1                       | 1253.4                               | GTGACGGTGTTCGAGACG                    | CATCGGAGCTGACAGTGT        | 229                       | 233                 | I4                 | 90     | 239             |                  |

Supplementary Table 1 (cont.): Verified *C. elegans* FLP Assays

| Chromosome | Assay Name    | WormBase SNP    | Position on Chromosome | Distance to next FLP Assay LEFT (kb) | Distance to next FLP Assay RIGHT (kb) | Oligo fwd                | Oligo rev               | Length Bristol (nt) | Length Hawaii (nt) | Change | GeneModels LEFT | GeneModels RIGHT |
|------------|---------------|-----------------|------------------------|--------------------------------------|---------------------------------------|--------------------------|-------------------------|---------------------|--------------------|--------|-----------------|------------------|
| IV         | ZH4-04a       | snp_Y55F3BR[6]  | 851112                 | 851.1                                | 889.1                                 | CTTTTTTCCTGGAGTTTCCTAGG  | TTCCGAATATTTTTTCATCCAAA | 265                 | 282                | I17    | 175             | 164              |
|            | ZH4-05        | snp_Y41D4[3]    | 1740251                | 889.1                                | 1018.4                                | ACGAAATGAAAATCAGCAGTT    | ATCCGGTGTCCGATACCCTT    | 144                 | 119                | I5     | 164             | 157              |
|            | ZH4-06        | snp_Y54G2[2]    | 2758615                | 1018.4                               | 1453.6                                | GGCTAGGCATAGATATAGTT     | TTTTCCACCACGTTCAAACAT   | 147                 | 144                | D3     | 157             | 320              |
|            | ZH4-07        | snp_K06B9[6]    | 4212198                | 1453.6                               | 369.5                                 | CATTTGGGGCGGTGCTGAA      | TTCCAGAAATGTTTAAAGCGTA  | 165                 | 172                | I7     | 320             | 91               |
|            | ZH4-16        | snp_F28E10[1]   | 4581704                | 369.5                                | 1185.0                                | GGCGTGGGTGATAGCGTGA      | TAAAGATTCTCCGACAAATCCA  | 246                 | 251                | I5     | 91              | 309              |
|            | ZH4-08        | snp_F44E8[2]    | 5766666                | 1185.0                               | 1160.1                                | GCCCGATGTGATCTGTCAAT     | GGATCGGTGGAAAATACCA     | 200                 | 192                | D8     | 309             | 253              |
|            | ZH4-02        | snp_T22D1[1]    | 6926779                | 1160.1                               | 573.8                                 | AGGAAAGATCATCATGATGAGA   | TGCCAAACCAAACGAAAGT     | 179                 | 186                | I7     | 253             | 154              |
|            | ZH4-03        | snp_F55G1[7]    | 7500574                | 573.8                                | 557.5                                 | CTGATGCTTTTTTCGGTGTACAAT | CTTTTGTCTGTTTGGATGAA    | 196                 | 194                | D2     | 154             | 155              |
|            | ZH4-17        | snp_C18F3[1]    | 8058041                | 557.5                                | 1252.6                                | TTAAAACCTCCAGGTCGAGTT    | GACGTAACGAATACCGAGTA    | 168                 | 169                | I1     | 155             | 329              |
|            | ZH4-18        | snp_F49C12[1]   | 9310637                | 1252.6                               | 523.5                                 | AAATGTTTGTGCCACATCTG     | TTCAACTGATGAGACACGTCT   | 142                 | 143                | I1     | 329             | 153              |
|            | ZH4-09        | pkP4081         | 9834093                | 523.5                                | 1338.7                                | TGATTTGGCTTATCAAGTAA     | CATTTGAATAATCCTTTGGAGAA | 103                 | 114                | I11    | 153             | 384              |
|            | ZH4-19        | snp_C08F8[2]    | 11172762               | 1338.7                               | 932.0                                 | CGGAAGTCTGAGTATTCGT      | TCTGTCCGTTTGGCACG       | 170                 | 173                | I3     | 384             | 227              |
|            | ZH4-20        | snp_M18[1]      | 12104785               | 932.0                                | 807.7                                 | CATCGTGGCTCCATTTTACA     | CACCGAAAACGGAATCAGA     | 154                 | 155                | I1     | 227             | 190              |
|            | ZH4-10a       | snp_K08D8[2]    | 12912468               | 807.7                                | 717.0                                 | TCAATTTGGCTGAAATGTAGCA   | CCATGTTCTCTTCAACTTTTCG  | 217                 | 211                | D6     | 190             | 189              |
|            | ZH4-21        | snp_C08F11[4]   | 13629499               | 717.0                                | 615.6                                 | GTTTAAACCCATAATGCTAAACA  | TTTTTCTCGATCACACGCA     | 171                 | 166                | D5     | 189             | 118              |
|            | ZH4-11        | pkP4094         | 14245143               | 615.6                                | 925.8                                 | GTTTTTAATGTGAAGCAGCAT    | TACATACGATTTGATTTACGAT  | 205                 | 212                | I7     | 118             | 135              |
|            | ZH4-12        | snp_Y40H7[3]    | 15170907               | 925.8                                | 797.5                                 | ATGTGACAAGTGGTGCAGC      | AAGGGGACGGAGGAAGAT      | 168                 | 173                | I5     | 135             | 98               |
|            | ZH4-22        | snp_Y105C58[23] | 15968421               | 797.5                                | 1522.0                                | TATATCGCAACTATCAACCAGT   | TATTTGCCAGATAATCTCAA    | 182                 | 185                | I3     | 98              | 254              |
|            | ZH5-02a       | snp_C05E4[5]    | 749319                 | 749.3                                | 801.7                                 | GGTGCAACCTCACTCAACAA     | TGCGAGCCGGATAGTTCIG     | 243                 | 261                | I18    | 209             | 146              |
|            | ZH5-13        | pkP5101         | 1551061                | 801.7                                | 688.4                                 | TTGCAATACTTTTGTATCGCCA   | GGCTTTTGTATCATCAACGAT   | 194                 | 190                | D4     | 146             | 189              |
|            | ZH5-03a       | snp_F41B5[5]    | 2239502                | 688.4                                | 1608.6                                | GGACTCCCACTGTTCCAGT      | CGACTCTCGTGTGCTGTTG     | 170                 | 176                | I6     | 189             | 498              |
|            | ZH5-14        | snp_F47C10[2]   | 3848148                | 1608.6                               | 1333.1                                | GCTTTCCCTTGTAGATATC      | CGGATAACAGGGCAGAGAT     | 183                 | 190                | I7     | 498             | 359              |
| ZH5-04     | snp_C03A7[4]  | 5181248         | 1333.1                 | 366.8                                | GCTGAAGGAGATTGACCGTA                  | TTCCAGCAAAATCTGTCGCAA    | 173                     | 169                 | D4                 | 359    | 86              |                  |
| ZH5-15     | snp_C18C4[3]  | 5548085         | 366.8                  | 1017.3                               | TGTAATTCAGCAGCTTAGACCA                | ACCATTCTCAATTCACACGACT   | 144                     | 145                 | I1                 | 86     | 240             |                  |
| ZH5-05     | snp_K04A8[2]  | 6565411         | 1017.3                 | 1236.5                               | TATCAATCGTAAATCCGACAT                 | AAACAGACTTACTCTGTTGTT    | 199                     | 203                 | I4                 | 240    | 388             |                  |
| ZH5-16     | snp_ZK742[1]  | 7801937         | 1236.5                 | 1585.2                               | CCCAATTCAGAAATCTTGCTT                 | GTGGGTTGTTCAAGTGGAGGA    | 112                     | 113                 | I1                 | 388    | 472             |                  |
| ZH5-01     | snp_E02C12[8] | 9387102         | 1585.2                 | 621.6                                | TCTTTAATAGCTTGCAACTTCTT               | GACATCGAGCTTTTCGGC       | 122                     | 128                 | I6                 | 472    | 180             |                  |
| ZH5-17     | snp_K08H10[1] | 10008679        | 621.6                  | 1275.5                               | TAGTTTTCCGTTGAOCTCTGA                 | AATACTTGGTTTTAGATAACGTA  | 195                     | 190                 | D5                 | 180    | 345             |                  |
| ZH5-18     | snp_C03E10[1] | 11284131        | 1275.5                 | 546.0                                | TGTTTATATCTGCGGTTCTCT                 | ATCCATATCGTCCCTTAATCG    | 222                     | 225                 | I3                 | 345    | 147             |                  |
| ZH5-06     | snp_D2023[10] | 11830176        | 546.0                  | 1512.8                               | GGACTGCTGAGATTTGGGA                   | ATTACAATTTCCCTCCACTGAA   | 100                     | 95                  | D5                 | 147    | 367             |                  |
| ZH5-11     | snp_C50B6[6]  | 13342985        | 1512.8                 | 877.0                                | GGTCGCTGTTTTGGGTGAA                   | TGCAAAAGTCAAGGGTATCCC    | 186                     | 190                 | I4                 | 367    | 233             |                  |
| ZH5-23     | snp_T16A9[2]  | 14220019        | 877.0                  | 1210.6                               | AAGTTTCACAAAATCTCTAAG                 | AATATTTTCGTATGTTGAGACTG  | 119                     | 117                 | D2                 | 233    | 373             |                  |
| ZH5-12     | snp_Y36E3[4]  | 15430591        | 1210.6                 | 671.0                                | GCGCCAAACTCATATCATTACCAA              | AAATCCAACCTGCCATGTAGTAAA | 315                     | 349                 | I34                | 373    | 257             |                  |
| ZH5-20     | snp_F22B8[2]  | 16101559        | 671.0                  | 746.0                                | TGAAGTAGATGAGACTGGCAT                 | CGTTAATGTTCCGTTCAATTTCT  | 199                     | 197                 | D2                 | 257    | 245             |                  |
| ZH5-08     | snp_T20B3[1]  | 16847598        | 746.0                  | 1300.1                               | GTTCAGTAGGTAACAATGCTT                 | GACAAATGGCAAAGTGGTTTCACT | 165                     | 169                 | I4                 | 245    | 363             |                  |
| ZH5-21     | snp_C14A6[1]  | 18147681        | 1300.1                 | 999.9                                | ACTACTTGAATATATCAAGGCTA               | TGACTACACCTCACTGATGA     | 211                     | 193                 | D18                | 363    | 234             |                  |
| ZH5-09     | snp_Y39B6[17] | 19147608        | 999.9                  | 902.5                                | TTGAGCAACCCAGCTCGAA                   | AGAAAAATTCGGTGGATAGT     | 200                     | 205                 | I5                 | 234    | 204             |                  |
| ZH5-22     | snp_Y113G7[6] | 20050070        | 902.5                  | 863.5                                | GAAAAATGCTGCTATCGTCCA                 | ACAAAAATTCGGAATTCACACAA  | 137                     | 147                 | I10                | 204    | 195             |                  |
| ZHX-16     | snp_C02H7[1]  | 734252          | 734.3                  | 476.4                                | TTTCAACGAGTATGCGGTGA                  | AGCATTGCCCGAGGGTTGA      | 184                     | 186                 | I2                 | 138    | 98              |                  |
| ZHX-17     | snp_C46H3[1]  | 1210652         | 476.4                  | 880.0                                | AGACCTACGTTTCCAACCTCAA                | AACAAGGACCTAGAAAAGATACT  | 159                     | 163                 | I4                 | 98     | 183             |                  |
| ZHX-03     | snp_F49H12[2] | 2090657         | 880.0                  | 1066.8                               | GTAATAAAAAATGTGGCGGTT                 | ACAGTGTCCGCTATGGCAT      | 170                     | 165                 | D5                 | 183    | 197             |                  |
| ZHX-08     | snp_C15C7[3]  | 3157420         | 1066.8                 | 1219.8                               | GAGATTTTCATAAGCCTGAGA                 | GGACCGACCTCCCGAGTTT      | 129                     | 125                 | D4                 | 197    | 250             |                  |
| ZHX-13     | snp_R160[2]   | 4377207         | 1219.8                 | 515.0                                | GCAGCGTCACTATGTTGG                    | TACTGTTTCAGTGGCTCGGAA    | 131                     | 133                 | I2                 | 250    | 104             |                  |
| ZHX-15     | snp_pkP6106   | 4892210         | 515.0                  | 1563.2                               | TGTCCTCACTTGTCTCAGCT                  | CAACGGGAATGGGAAAACC      | 206                     | 204                 | D2                 | 104    | 315             |                  |
| ZHX-10     | snp_K04E7[1]  | 6455366         | 1563.2                 | 1376.7                               | GGGGGAATTTGAGAGTGAA                   | TGCTGATTCATCCCCAGAT      | 200                     | 207                 | I7                 | 315    | 292             |                  |
| ZHX-02     | snp_C54D2[3]  | 7832035         | 1376.7                 | 559.5                                | AATCGGAATTCGATACAACCTCAGTT            | TTTATGGACCAAAACGGGT      | 250                     | 258                 | I8                 | 292    | 134             |                  |
| ZHX-24     | snp_F41D9[4]  | 8391581         | 559.5                  | 1618.5                               | TAATTTTACTTCAAGCTCTG                  | TCACTGCCATGGACATCTGC     | 212                     | 213                 | I1                 | 134    | 345             |                  |
| ZHX-07     | pkP6138       | 10010095        | 1618.5                 | 1454.5                               | TTTGTGAACGAACCTCTCAA                  | TTTTTCGAGTGGCTCATTTCA    | 193                     | 186                 | D7                 | 345    | 300             |                  |
| ZHX-12     | snp_T25C12[4] | 11464550        | 1454.5                 | 937.2                                | TCGTCCCACTCCCTTT                      | GGAGAAAAGTCCAGGAAAAGA    | 116                     | 110                 | D6                 | 300    | 194             |                  |
| ZHX-11     | snp_F17E5[1]  | 12401713        | 937.2                  | 887.2                                | GATGTGATGAATGACTACCTT                 | CTCCAAGGATGACATTAAC      | 175                     | 170                 | D5                 | 194    | 162             |                  |
| ZHX-05     | snp_R04D3[5]  | 13288921        | 887.2                  | 1140.5                               | TATGTGATTTGTTAATTTGAGCA               | TTTACACTGTATAACACACTA    | 117                     | 121                 | I4                 | 162    | 245             |                  |
| ZHX-21a    | snp_F23D12[2] | 14429469        | 1140.5                 | 1131.4                               | GTGATTTTCTGCTTTGTTTAAAC               | GTTTCTGTGCTTTTTCACATC    | 157                     | 160                 | I3                 | 245    | 200             |                  |
| ZHX-06     | snp_C02C6[1]  | 15560852        | 1131.4                 | 875.5                                | TGGGAAAGATGGTGGTAA                    | ACTTTTAAGCAGCACTGAT      | 156                     | 150                 | D6                 | 200    | 142             |                  |
| ZHX-22     | snp_F38E9[2]  | 16436347        | 875.5                  | 555.5                                | GATCAAAATGGATTCGATGCT                 | TCTCACTACACCAACAACCT     | 209                     | 205                 | D4                 | 142    | 99              |                  |
| ZHX-23     | snp_K02H8[1]  | 16991892        | 555.5                  | 723.0                                | AAACGACATCCTTGAGTTTCA                 | GAAATTCGGCAAAATAAAGGT    | 138                     | 134                 | D4                 | 99     | 140             |                  |
