# Supplementary material for: A universal method for automated gene mapping
Source: PubMed Central journal article supplement (PMC551539; doi:10.1186/gb-2005-6-2-r19), 2005-01-17
Supplement: gb-2005-6-2-r19-s10.pdf [file gb-2005-6-2-r19-s10.pdf]

Supplementary Table 2: Verified *Drosophila* FLP Assays

| Chromosome Arm | Assay                               | Oligo fwd                       | Oligo rev                       | Genetic Position      | Physical Position                        | Cytological Position | Length EP | Length FRT             | Length of Other Alleles               | Note                                                                                     | Designed by   |
|----------------|-------------------------------------|---------------------------------|---------------------------------|-----------------------|------------------------------------------|----------------------|-----------|------------------------|---------------------------------------|------------------------------------------------------------------------------------------|---------------|
| 2L             | 2L017                               | GCAAAGCGTCGATATGACAGC           | CATGCGTGAGTTCCCCCTAC            | 2-3/4                 | 2L:1675916..1676066                      | 22B4                 | 148       | 150                    | 149 (ywWG)                            |                                                                                          | this study    |
|                | 2L030                               | CCCCTTGAAGACCTCCCTCATTTT        | CACCTGGGTTCCCTGGTTTCTGTTT       | 2-8/9                 | 2L:3383921..3384100                      | 23E3                 | 158       | 179                    |                                       |                                                                                          | Berger et al. |
|                | 2L038                               | TCGATTTCCATCTAATCAACCTGTG       | AAATGAGTTTGAAGCCATCGC           | 2-13                  | 2L:4368759..4368910                      | 24E4                 | 150       | 152                    |                                       |                                                                                          | this study    |
|                | 2L051                               | TTTACGGCTTGGCTGGTAGCTC          | GAACAGATTACAGGGCATGGTGC         | 2-17                  | 2L:5565351..5565531                      | 25F1                 | 181       | 174                    | 178 (ywGT)                            |                                                                                          | this study    |
|                | 2L057                               | GCAAAACGAGTAATGGGCTGTAAACAA     | GGATTAGTTTTFAGACCAAAATGGGAGCAAC | 2-20                  | 2L:5950022..5950152                      | 26A3                 | 128       | 149                    |                                       |                                                                                          | Berger et al. |
|                | 2L069                               | GTGGTGCAGAAAGATAAACCAAAATAACTGG | TCATTGATTGAAACGCTGAAAGTTTTAAAGG | 2-24                  | 2L:7729483..7729625; 2L:7723343..7723485 | 28C1                 | 151       | 139                    |                                       | fragment located in perfect repeat, both fragments seem to exhibit the same polymorphism | Berger et al. |
|                | 2L075                               | GTTATGTCTTCCCTCGCTGTCG          | CATAAAAGGCAGAAGGCAGCAC          | 2-30                  | 2L:8566862..8566967                      | 29E2                 | 99        | 104                    |                                       |                                                                                          | this study    |
|                | 2L088                               | TCCTACGACATTAGTATATGTTTGTCTTTGG | GCTCCACGTTGACCGACTCACA          | 2-34                  | 2L:9835196..9835203                      | 30D1                 | 281       | 250                    | 277 (FRT2R)                           |                                                                                          | Berger et al. |
|                | 2L090                               | TCATGCGCTCGAGTTTTCAGC           | CTGAACGATAATCAGAGGAGGG          | 2-38                  | 2L:10076927..10077038                    | 31A2                 | 109       | 110                    |                                       |                                                                                          | this study    |
|                | 2L093                               | CCCTGTGCTTGGTTGGTGGATTTTT       | CGGAAAACCTTACTTTTCGTTACGCTCA    | 2-41.3                | 2L:10435288..10435462                    | 31E1-2               | 164       | 148                    |                                       |                                                                                          | Berger et al. |
|                | 2L119                               | CGAAAACGTAGCGCAACCACTACAGA      | AAATGGCAGGGCGAAAGACCAAA         | 2-46/47               | 2L:12921612..12921731                    | 34A2                 | 115       | 126                    |                                       |                                                                                          | Berger et al. |
|                | 2L143                               | GTAGTCCAGCCCACTGTTCCCTC         | TTACAATGCAAAATAGTCCCGTACACATC   | 2-51                  | 2L:16310964..16311171                    | 35F1                 | 209       | 191                    |                                       |                                                                                          | Berger et al. |
|                | 2R017                               | CTCAGCGTGGGCTGAGATATGAA         | TCAACAACGAAGGAGAGGAAGGAGTG      | 2-59/60               | 2R:4570039..4570211                      | 45F3-4               | 171       | 141                    | 140 (F42w+cl), 169 (ywWG), 173 (ywGT) |                                                                                          | Berger et al. |
|                | 2R039                               | CATCGCCCTCTGCGTTTCAGTTT         | GCCGCCATTTGTTGTCCTTTT           | 2-64                  | 2R:7269220..7269415                      | 48E10                | 179       | 195                    |                                       |                                                                                          | Berger et al. |
| 2R051          | CAGTCGGCAATCGATCCGTT                | GATTAACCCGTTTACATCATTACTCC      | 2-68                            | 2R:8076748..8076866   | 49E7                                     | 113                  | 115       |                        |                                       | this study                                                                               |               |
| 2R057          | TCAGGCGATGACAAATGCTATCG             | CATTCCTCAATGGCTTGGCCG           | 2-69                            | 2R:8963534..8963751   | 50C9                                     |                      | 215       |                        |                                       | this study                                                                               |               |
| 2R058          | AAACGCTTGAATGAACCTCCACAG            | TCGGGACTATGCGAGGTTCAAG          | 2-69                            | 2R:8994529..8994702   | 50C9                                     | 171                  |           |                        |                                       | this study                                                                               |               |
| 2R060          | ACTGAAAACAGCGGCGCCACAG              | TTCTCCGGAGACCTTCAACTG           | 2-70                            | 2R:9182178..9182320   | 50D7                                     | 143                  | 149       |                        |                                       | this study                                                                               |               |
| 2R061          | ATGTGCTTATCACACATGACTTACG           | GATCATAACAGCCCTTGAATTCAGC       | 2-70                            | 2R:9287368..9287674   | 50E4                                     |                      | 312       |                        |                                       | this study                                                                               |               |
| 2R068          | TCACCCCTAAATAGTTTGGTGGTCTGAAAA      | TGGGAGCAATGACAAACAATAGACC       | 2-73                            | 2R:10139945..10140151 | 51D12                                    | 206                  | 200       | 213 (ywGT)             |                                       | Berger et al.                                                                            |               |
| 2R083          | TCACAAGCCCTCAACCAATACCATC           | CGATGGCTTCAAGGCGACACA           | 2-77/78                         | 2R:11749308..11749499 | 53C11                                    | 191                  | 179       | 190 (F42w+cl)          |                                       | Berger et al.                                                                            |               |
| 2R090          | ATCTTATGGCAACGATGATCAAC             | TTTTGTGTTCCGCTTCAGCTT           | 2-80                            | 2R:12466048..12466182 | 54B5                                     | 128                  | 129       |                        |                                       | this study                                                                               |               |
| 2R096          | CAGGATTTGATGGATTTATGCTTTGCT         | TGTAAAAATGTAAGTGTAGGGCTTCCCGTGT | 2-84                            | 2R:13256746..13257052 | 55B12                                    | 352                  | 306       |                        |                                       | Berger et al.                                                                            |               |
| 2R109          | CCTGCTCCATGCATGAAAGAAAT             | TGTCTGCACAGGAAATCAGATCAAG       | 2-90                            | 2R:15199874..15200115 | 56F6                                     | 225                  | 240       | 238 (ywWG), 227 (EP2L) |                                       | Berger et al.                                                                            |               |
| 2R114          | TGACCACAATGAAAGAGAGACACC            | TCTCGCAGCCATTTCTGTTGT           | 2-93                            | 2R:15540995..15541302 | 57A2-3                                   | 310                  | 298       | 312 (ywWG)             |                                       | PLP assay from Berger et al. yields equally sized fragments                              | this study    |
| 2R118          | CTCGGTTGTTGGGTCAGTTC                | GGCTCGTCAATGGGAAGATGTC          | 2-97                            | 2R:16117936..16118168 | 57B16-19                                 | 227                  | 226       | 233 (F42w+cl)          |                                       | this study                                                                               |               |
| 2R124          | TCTCCTGCTTACATCAGCTC                | ATAAGCAGCTGCAAAAAGTGC           | 2-99                            | 2R:16840885..16841075 | 58A1                                     | 191                  | 205       |                        |                                       | this study                                                                               |               |
| 2R130          | GGACTCCGCAATGAAATGATT               | CCGAATCTGGACGAGGATCGC           | 2-102                           | 2R:17944246..17944461 | 59B4-6                                   | 215                  | 232       | 224 (F42w+cl)          |                                       | this study                                                                               |               |
| 2R139          | AAGTAGAAGACTTTCGTATCAGCCCTTGA       | AGTGACGAGGCAAAATCGGAGAA         | 2-105                           | 2R:18613182..18613396 | 59F1-4                                   | 215                  | 232       |                        |                                       | this study                                                                               |               |
| 3L021          | AACAATAAATCTTGGCGGTGGCATGG          | CAGTGGGACTGTGCTGCTGCTGT         | 3-4.4                           | 3L:2807890..2808083   | 63A1-2                                   | 204                  | 193       | 198 (ywWG)             |                                       | Berger et al.                                                                            |               |
| 3L031          | CGGCGGTAACATGAACTTATAAAGTTTTC       | GGGGAATCGGAAGATAGCTCACTAGGTTTTT | 3-67                            | 3L:3756972..3757142   | 63E8-F1                                  | 188                  | 167       | 170 (ywWG)             |                                       | Berger et al.                                                                            |               |
| 3L041          | TTGCACTGCGCCTCATTTTCAATTTT          | CCAACCCACTCGCCTCTTTATTTTC       | 3-167                           | 3L:5182688..5182855   | 64C9-11                                  | 193                  | 164       |                        |                                       | Berger et al.                                                                            |               |
| 3L058          | GTCTTTCAAGGTGCTGTATGATATGAG         | AAACATGATGTTGACCCAGAACGACA      | 3-21/267                        | 3L:6563657..6563786   | 65B4-5                                   | 127                  | 141       | 142 (ywGT)             |                                       | Berger et al.                                                                            |               |
| 3L064          | GGCAAGTATCAAAGTTCACTTTTCCCACAAAC    | GACTACCACATACCCTGACCCCGAAA      | 3-23/25.87                      | 3L:7022923..7023082   | 65E2-3                                   | 158                  | 135       | 159 (ywWG)             |                                       | Berger et al.                                                                            |               |
| 3L076          | CTGCATATTAGTTGGTCTCTGG              | ATGAATTAATCATGACCGCTACAC        | 3-24.5/26.57                    | 3L:8220820..8220996   | 66C1                                     | 170                  | 174       | 176 (ywGT)             |                                       | PLP assay from Berger et al. yields equally sized fragments, does not amplify from FRT3R | this study    |
| 3L083          | TTACACGGCCAGCAACAGATT               | AATGCCAACAATAAGCTGGAA           | 3-277                           | 3L:9256894..9257245   | 67A4                                     | 365                  | 359       | 354 (ywWG)             |                                       | this study                                                                               |               |
| 3L086          | CGAGAAATCAACAAGTAAATAGCTCCAAAGCTGAA | TGGTATTATATGGCAATGGAACGGGACA    | 3-28.9                          | 3L:9701662..9701862   | 67C5                                     | 200                  | 216       |                        |                                       | Berger et al.                                                                            |               |
| 3L094          | CAAGGGCCGCAATAAATAAGAGTAACAGA       | ACTTTGGCCCAAAAACCGACAAC         | 3-34                            | 3L:10614298..10614501 | 67E5                                     | 193                  | 203       |                        |                                       | Berger et al.                                                                            |               |
| 3L105          | GTTTGGCAGGCGACATCCGACA              | GGCTAACTGGCCCATACATTTATTTGGCTTT | 3-37/38                         | 3L:12442262..12442489 | 69C2                                     | 227                  | 208       |                        |                                       | Berger et al.                                                                            |               |
| 3L127          | GCACAATAAACCAACAGACGCTCACA          | GAAAATAAATGAGGAAAATCGCCGCAAC    | 3-42/43                         | 3L:15416126..15416338 | 71C2                                     | 197                  | 209       |                        |                                       | Berger et al.                                                                            |               |
| 3L148          | GGTGCACTCACAGAAAACAGGTATG           | CCCCAGATCCATTCTACTGCTCGC        | 3-45                            | 3L:17527301..17527637 | 74D2-3                                   | 338                  | 333       |                        |                                       | this study                                                                               |               |
| 3R061          | GCACATGAACATGAGACATACATTTAAACAAA    | TCGMAATGCCGACCAAAATAGTGA        | 3-51                            | 3R:8555097..8555250   | 87C4                                     | 142                  | 152       |                        |                                       | Berger et al.                                                                            |               |
| 3R074          | TTTTAGAAGGCAACCGCAGC                | GTTAGAAGCCTTCTCCCGCC            | 3-55                            | 3R:10630472..10630613 | 88D2                                     | 140                  | 141       |                        |                                       | this study                                                                               |               |
| 3R092          | GCGACAGGCAAAAACTCCTGT               | AAGATCAATTCACAGTTCCTCACGATG     | 3-59                            | 3R:13035430..13035681 | 89F1                                     | 250                  | 215       |                        |                                       | Berger et al.                                                                            |               |
| 3R122          | TGAAACCTGTTAGGCTTTTTCACACCTT        | GGGAATGAGTTAGCAAGTGCCTTTTGT     | 3-64/65                         | 3R:14763052..14763240 | 91D3                                     | 173                  | 188       |                        |                                       | Berger et al.                                                                            |               |
| 3R151          | CCATGTCGCACTTCTTTGATATTTGCTTTC      | CAAGGCTCAGCAGACAGGCATC          | 3-68                            | 3R:16242420..16242614 | 92E4                                     | 194                  | 210       |                        |                                       | Berger et al.                                                                            |               |
| 3R160          | CAATGTGACAGATTAAACGCT               | GCTGTGAGCTTCTAGTTTGAAT          | 3-72                            | 3R:17362917..17363093 | 93E2                                     | 175                  | 176       |                        |                                       | does not amplify from some strains                                                       | this study    |
| 3R162          | CCTTTACAGACCTCAAACCTTAAG            | GTTTTCTCGCTGGTGAACG             | 3-73                            | 3R:17618105..17618307 | 93F                                      |                      |           |                        |                                       | this study                                                                               |               |
| 3R169          | TTCAAATTAACAAGAAAAATAGCTCGATTGGTGT  | GTGTGAGCGAGCGAGCAGAG            | 3-75/76                         | 3R:18484054..18484270 | 94B5                                     | 198                  | 214       |                        |                                       | Berger et al.                                                                            |               |
| 3R186          | TCCGCTGCGTGTGTAAGATTAGC             | GCTATTGCCCACTGTGCCGTA           | 3-81                            | 3R:19738563..19738693 | 95C9-11                                  | 130                  | 134       |                        |                                       | this study                                                                               |               |
| 3R192          | AGCCAGAGTTTATGATCCCAACAT            | CGAGCTGTGGTTCGCTTG              | 3-86                            | 3R:20556900..20557073 | 96A18-19                                 | 178                  | 173       |                        |                                       | this study                                                                               |               |
| 3R204          | TGCCCTTATTAATGACCCCAAAAACCT         | CTTTTGTGCTTTATATCAAGCTTTGGGAAA  | 3-90                            | 3R:22075356..22075533 | 97A4                                     | 187                  | 177       |                        |                                       | Berger et al.                                                                            |               |
| 3R221          | CGATTAAGGAAATGCCCGCTGT              | AGTGTGTGCCCTGTGCTGTGTGT         | 3-95                            | 3R:24907858..24908171 | 98F5                                     | 365                  | 309       | 311 (ywWG)             |                                       | Berger et al.                                                                            |               |
| 3R224          | GGAAACATCCTGTAGGAGATGTCAGAGGA       | AGGCGGGACCAAGAACGGTAA           | 3-99                            | 3R:25285399..25285586 | 99A5-8                                   | 190                  | 180       | 187 (ywWG)             |                                       | Berger et al.                                                                            |               |
