# Supplementary material for: A universal method for automated gene mapping
Source: PubMed Central journal article supplement (PMC551539; doi:10.1186/gb-2005-6-2-r19), 2005-01-17
Supplement: gb-2005-6-2-r19-s11.pdf [file gb-2005-6-2-r19-s11.pdf]

| <b>Assay</b>  | <b>estimated genetic position</b> | <b>estimated genetic distance (cM)</b> | <b>measured genetic distance (cM)</b> |
|---------------|-----------------------------------|----------------------------------------|---------------------------------------|
| <i>FRT42D</i> | 2-56                              | -                                      |                                       |
| <b>2R017</b>  | 2-59/60                           | 3-4                                    | 3.9                                   |
| <b>2R039</b>  | 2-64                              | 4-5                                    | 5.8                                   |
| <b>2R051</b>  | 2-68                              | 4                                      | 3.9                                   |
| <b>2R060</b>  | 2-70                              | 2                                      | 8.7                                   |
| <b>2R068</b>  | 2-73                              | 3                                      | 3.9                                   |
| <b>2R083</b>  | 2-77/78                           | 4-5                                    | 5.8                                   |
| <b>2R096</b>  | 2-84                              | 6-7                                    | 2.6                                   |
| <b>2R109</b>  | 2-90                              | 6                                      | 3.1                                   |
| <b>2R118</b>  | 2-97                              | 7                                      | 2.1                                   |
| <b>2R124</b>  | 2-99                              | 2                                      | 3.4                                   |
| <b>2R130</b>  | 2-102                             | 3                                      | 3.4                                   |
| <b>2R139</b>  | 2-105                             | 3                                      | 2.4                                   |
| <i>EP0755</i> | 2-108                             | 3                                      | 3.0                                   |

**Supplementary table 3:** Estimated (Lindsley and Zimm, 1992) versus measured genetic distances on chromosome 2R

Lindsley, D. L., and Zimm, G. G. (1992). *The Genome of Drosophila melanogaster*. Academic Press, NY.
