# Supplementary material for: A universal method for automated gene mapping
Source: PubMed Central journal article supplement (PMC551539; doi:10.1186/gb-2005-6-2-r19), 2005-01-17
Supplement: gb-2005-6-2-r19-s12.pdf [file gb-2005-6-2-r19-s12.pdf]

**Supplementary Table 4:  
Predicted *C. elegans* InDels LGI**

(Validated FLP assays are shown in blue)

| WormBase SNP           | Position on Chromosome (nt) | Distance between InDels (nt) | Assay Name     |
|------------------------|-----------------------------|------------------------------|----------------|
| uCE1-505               | 72383                       | -                            |                |
| snp_Y48G1C[3]          | 79850                       | 7467                         |                |
| pkP5173                | 90809                       | 10959                        |                |
| uCE1-507               | 94846                       | 4037                         |                |
| snp_Y48G1C[4]          | 106371                      | 11525                        |                |
| snp_F53G12[3]          | 116093                      | 9722                         |                |
| snp_F53G12[4]          | 116096                      | 3                            |                |
| snp_F53G12[7]          | 116408                      | 312                          |                |
| snp_F53G12[10]         | 131906                      | 15498                        |                |
| snp_F56C11[2]          | 168054                      | 36148                        |                |
| uCE1-517               | 183719                      | 15665                        |                |
| snp_K10E9[2]           | 196566                      | 12847                        |                |
| pkP608                 | 265326                      | 68760                        |                |
| snp_C53D5[3]           | 282418                      | 17092                        |                |
| snp_Y48G1[2]           | 345872                      | 63454                        |                |
| uCE1-534               | 382084                      | 36212                        |                |
| snp_W04C9[1]           | 468483                      | 86399                        |                |
| snp_W04C9[2]           | 469833                      | 1350                         |                |
| <b>pkP1099</b>         | <b>470031</b>               | <b>198</b>                   | <b>ZH1-16</b>  |
| uCE1-544               | 540404                      | 70373                        |                |
| uCE1-546               | 567752                      | 27348                        |                |
| uCE1-547               | 567918                      | 166                          |                |
| uCE1-549               | 570815                      | 2897                         |                |
| snp_Y65B4BR[10]        | 578443                      | 7628                         |                |
| uCE1-561               | 659336                      | 80893                        |                |
| snp_Y18H1[4]           | 675021                      | 15685                        |                |
| snp_Y18H1[6]           | 689406                      | 14385                        |                |
| pkP1100                | 689674                      | 268                          |                |
| snp_Y18H1[11]          | 689676                      | 2                            |                |
| snp_Y18H1[12]          | 689817                      | 141                          |                |
| snp_Y18H1[14]          | 692699                      | 2882                         |                |
| snp_T06A4[1]           | 775761                      | 83062                        |                |
| uCE1-572               | 778492                      | 2731                         |                |
| uCE1-573               | 794467                      | 15975                        |                |
| snp_Y95B8[2]           | 849364                      | 54897                        |                |
| snp_Y95B8[3]           | 849412                      | 48                           |                |
| uCE1-580               | 884659                      | 35247                        |                |
| snp_Y95B8[4]           | 906553                      | 21894                        |                |
| snp_Y95B8[5]           | 906566                      | 13                           |                |
| snp_Y95B8[6]           | 906745                      | 179                          |                |
| snp_F54A5[2]           | 984033                      | 77288                        |                |
| snp_F54A5[6]           | 989669                      | 5636                         |                |
| snp_F54A5[8]           | 990183                      | 514                          |                |
| pkP5087                | 993262                      | 3079                         |                |
| uCE1-584               | 1011368                     | 18106                        |                |
| <b>snp_Y34D9[1]</b>    | <b>1038236</b>              | <b>26868</b>                 | <b>ZH1-17</b>  |
| snp_Y34D9[3]           | 1038705                     | 469                          |                |
| uCE1-586               | 1089792                     | 51087                        |                |
| snp_Y48G8AL[4]         | 1202918                     | 113126                       |                |
| snp_Y48G8AR[7]         | 1272922                     | 70004                        |                |
| uCE1-591               | 1451093                     | 178171                       |                |
| snp_F47G6[1]           | 1483430                     | 32337                        |                |
| snp_Y73E7[3]           | 1627653                     | 144223                       |                |
| uCE1-606               | 1644162                     | 16509                        |                |
| uCE1-612               | 1657411                     | 13249                        |                |
| pkP772                 | 1671768                     | 14357                        |                |
| pkP546                 | 1671777                     | 9                            |                |
| snp_Y71G12B[2]         | 1684797                     | 13020                        |                |
| snp_Y71G12B[5]         | 1713739                     | 28942                        |                |
| pkP5136                | 1715541                     | 1802                         |                |
| <b>snp_Y71G12[15]</b>  | <b>1724899</b>              | <b>9358</b>                  | <b>ZH1-10a</b> |
| snp_Y71G12B[16]        | 1726189                     | 1290                         |                |
| snp_Y71G12B[19]        | 1788070                     | 61881                        |                |
| snp_Y71G12B[24]        | 1788073                     | 3                            |                |
| uCE1-621               | 1825302                     | 37229                        |                |
| uCE1-627               | 2108968                     | 283666                       |                |
| snp_Y37E3[2]           | 2153024                     | 44056                        |                |
| snp_F12B6[3]           | 2254614                     | 101590                       |                |
| <b>snp_Y39G10AL[1]</b> | <b>2271065</b>              | <b>16451</b>                 | <b>ZH1-25</b>  |
| snp_Y39G10AR[7]        | 2383371                     | 112306                       |                |
| uCE1-642               | 2419460                     | 36089                        |                |
| uCE1-644               | 2420758                     | 1298                         |                |
| uCE1-658               | 2533154                     | 112396                       |                |
| uCE1-684               | 2632487                     | 99333                        |                |
| snp_F40E3[1]           | 2635214                     | 2727                         |                |
| pkP971                 | 2660318                     | 25104                        |                |
| <b>snp_F40E3[4]</b>    | <b>2663170</b>              | <b>2852</b>                  | <b>ZH1-07</b>  |
| snp_F32B5[2]           | 2664312                     | 1142                         |                |
| snp_F32B5[4]           | 2690599                     | 26287                        |                |
| snp_F32B5[6]           | 2690887                     | 288                          |                |
| pkP5107                | 2746242                     | 55355                        |                |
| pkP647                 | 2746800                     | 558                          |                |

|                       |                |              |                |
|-----------------------|----------------|--------------|----------------|
| uCE1-711              | 2805736        | 58936        |                |
| uCE1-724              | 2806985        | 1249         |                |
| snp_W03D8[1]          | 2809886        | 2901         |                |
| pkP5281               | 2816135        | 6249         |                |
| uCE1-742              | 2822891        | 6756         |                |
| uCE1-743              | 2834516        | 11625        |                |
| uCE1-752              | 2852680        | 18164        |                |
| uCE1-753              | 2880331        | 27651        |                |
| snp_Y71F9AL[2]        | 2908353        | 28022        |                |
| snp_Y71F9AL[3]        | 2908539        | 186          |                |
| snp_Y71F9AR[1]        | 2948948        | 40409        |                |
| pkP559                | 2972838        | 23890        |                |
| pkP810                | 2972849        | 11           |                |
| pkP881                | 2972853        | 4            |                |
| snp_Y54E10BR[1]       | 3018918        | 46065        |                |
| snp_M01B12[2]         | 3061728        | 42810        |                |
| <b>snp_K09H9[2]</b>   | <b>3123875</b> | <b>62147</b> | <b>ZH1-18a</b> |
| snp_Y54E10[3]         | 3165696        | 41821        |                |
| snp_Y54E10[4]         | 3177032        | 11336        |                |
| snp_Y54E10[8]         | 3177302        | 270          |                |
| snp_Y54E10[9]         | 3177481        | 179          |                |
| snp_Y54E10[12]        | 3181386        | 3905         |                |
| snp_Y54E10[14]        | 3181459        | 73           |                |
| snp_Y54E10[15]        | 3259792        | 78333        |                |
| snp_Y47G6A[4]         | 3478038        | 218246       |                |
| snp_Y47G6A[5]         | 3489536        | 11498        |                |
| uCE1-778              | 3561396        | 71860        |                |
| uCE1-780              | 3561649        | 253          |                |
| snp_Y47G6A[11]        | 3573241        | 11592        |                |
| uCE1-781              | 3587946        | 14705        |                |
| pkP1094               | 3618019        | 30073        |                |
| pkP1108               | 3618019        | 0            |                |
| uCE1-792              | 3803610        | 185591       |                |
| uCE1-793              | 3806352        | 2742         |                |
| uCE1-795              | 3840469        | 34117        |                |
| uCE1-798              | 3911814        | 71345        |                |
| uCE1-800              | 4043823        | 132009       |                |
| snp_C09D1[1]          | 4046686        | 2863         |                |
| uCE1-805              | 4078287        | 31601        |                |
| uCE1-807              | 4080037        | 1750         |                |
| snp_C24G7[1]          | 4098818        | 18781        |                |
| pkP990                | 4128482        | 29664        |                |
| uCE1-815              | 4231070        | 102588       |                |
| snp_C41D11[2]         | 4449456        | 218386       |                |
| snp_C41D11[4]         | 4449652        | 196          |                |
| snp_Y119C1B[2]        | 4526895        | 77243        |                |
| pkP5100               | 4551961        | 25066        |                |
| <b>snp_Y119C1B[8]</b> | <b>4557221</b> | <b>5260</b>  | <b>ZH1-03</b>  |
| pkP895                | 4578572        | 21351        |                |
| uCE1-847              | 4584756        | 6184         |                |
| snp_D1007[4]          | 4588185        | 3429         |                |
| snp_T04D1[1]          | 4672603        | 84418        |                |
| snp_T04D1[2]          | 4673042        | 439          |                |
| uCE1-850              | 4677783        | 4741         |                |
| uCE1-857              | 4761814        | 84031        |                |
| pkP547                | 4796425        | 34611        |                |
| pkP823                | 4796426        | 1            |                |
| pkP775                | 4796435        | 9            |                |
| pkP811                | 4796437        | 2            |                |
| snp_F07H8[1]          | 4821897        | 25460        |                |
| <b>snp_F57C9[1]</b>   | <b>4837079</b> | <b>15182</b> | <b>ZH1-27</b>  |
| pkP937                | 4859345        | 22266        |                |
| pkP5178               | 4912890        | 53545        |                |
| pkP5019               | 4912943        | 53           |                |
| uCE1-861              | 4939092        | 26149        |                |
| pkP5002               | 5037030        | 97938        |                |
| uCE1-867              | 5052010        | 14980        |                |
| uCE1-868              | 5052032        | 22           |                |
| pkP5089               | 5075778        | 23746        |                |
| pkP967                | 5075781        | 3            |                |
| pkP536                | 5156607        | 80826        |                |
| uCE1-870              | 5172304        | 15697        |                |
| snp_T05E8[1]          | 5471780        | 299476       |                |
| snp_C09D4[2]          | 5485627        | 13847        |                |
| pkP5319               | 5493009        | 7382         |                |
| snp_F59A3[1]          | 5518144        | 25135        |                |
| uCE1-880              | 5531369        | 13225        |                |
| snp_F55F8[1]          | 5666874        | 135505       |                |
| snp_F56H1[4]          | 5765336        | 98462        |                |
| uCE1-891              | 5815437        | 50101        |                |
| uCE1-896              | 5836926        | 21489        |                |
| pkP5312               | 5896720        | 59794        |                |
| snp_B0207[2]          | 5948722        | 52002        |                |
| snp_B0025[1]          | 6030811        | 82089        |                |
| uCE1-900              | 6035832        | 5021         |                |
| pkP5510               | 6100854        | 65022        |                |
| pkP571                | 6100856        | 2            |                |
| pkP5026               | 6160218        | 59362        |                |
| snp_C48E7[3]          | 6271415        | 111197       |                |
| snp_F26B1[2]          | 6340071        | 68656        |                |
| snp_F26B1[3]          | 6340207        | 136          |                |

|                     |                 |              |               |
|---------------------|-----------------|--------------|---------------|
| uCE1-910            | 6476163         | 135956       |               |
| uCE1-911            | 6532900         | 56737        |               |
| snp_D2092[1]        | 6620138         | 87238        |               |
| pkP5113             | 6664947         | 44809        |               |
| pkP5242             | 6696792         | 31845        |               |
| snp_T23B3[1]        | 6709909         | 13117        |               |
| pkP592              | 6875317         | 165408       |               |
| uCE1-920            | 6910016         | 34699        |               |
| pkP5039             | 6937709         | 27693        |               |
| snp_T10B11[1]       | 6945315         | 7606         |               |
| pkP5164             | 6985989         | 40674        |               |
| pkP5474             | 7036908         | 50919        |               |
| uCE1-926            | 7442830         | 405922       |               |
| <b>snp_ZK524[2]</b> | <b>7444723</b>  | <b>1893</b>  | <b>ZH1-34</b> |
| snp_T28F4[1]        | 7487429         | 42706        |               |
| snp_T23G11[1]       | 7693326         | 205897       |               |
| snp_T23G11[6]       | 7696742         | 3416         |               |
| <b>snp_F27D4[1]</b> | <b>7715727</b>  | <b>18985</b> | <b>ZH1-21</b> |
| pkP550              | 7808902         | 93175        |               |
| uCE1-946            | 7902970         | 94068        |               |
| snp_F20G4[1]        | 7926642         | 23672        |               |
| snp_H05L14[1]       | 7987989         | 61347        |               |
| pkP5212             | 8117273         | 129284       |               |
| uCE1-962            | 8145716         | 28443        |               |
| pkP596              | 8152963         | 7247         |               |
| pkP5268             | 8152967         | 4            |               |
| pkP652              | 8166790         | 13823        |               |
| pkP935              | 8201816         | 35026        |               |
| snp_F08A10[1]       | 8206743         | 4927         |               |
| pkP979              | 8284991         | 78248        |               |
| uCE1-968            | 8366776         | 81785        |               |
| pkP5121             | 8373617         | 6841         |               |
| pkP5282             | 8381920         | 8303         |               |
| <b>snp_F02E9[1]</b> | <b>8416904</b>  | <b>34984</b> | <b>ZH1-01</b> |
| snp_F10D11[1]       | 8446109         | 29205        |               |
| snp_K07A12[3]       | 8675599         | 229490       |               |
| pkP5295             | 8680885         | 5286         |               |
| pkP611              | 8680889         | 4            |               |
| pkP1081             | 8750798         | 69909        |               |
| snp_DY3[2]          | 8795314         | 44516        |               |
| uCE1-992            | 8798056         | 2742         |               |
| uCE1-994            | 8805751         | 7695         |               |
| pkP5061             | 8887036         | 81285        |               |
| pkP5207             | 8903719         | 16683        |               |
| pkP5083             | 8903729         | 10           |               |
| pkP5463             | 8903733         | 4            |               |
| pkP548              | 8903733         | 0            |               |
| pkP765              | 8903745         | 12           |               |
| snp_T08G11[3]       | 8908060         | 4315         |               |
| snp_F53B6[2]        | 8965822         | 57762        |               |
| uCE1-1008           | 9082259         | 116437       |               |
| uCE1-1014           | 9166001         | 83742        |               |
| uCE1-1017           | 9252504         | 86503        |               |
| uCE1-1018           | 9255610         | 3106         |               |
| <b>snp_F14B4[1]</b> | <b>9287981</b>  | <b>32371</b> | <b>ZH1-22</b> |
| uCE1-1026           | 9387470         | 99489        |               |
| uCE1-1027           | 9387541         | 71           |               |
| uCE1-1029           | 9505176         | 117635       |               |
| pkP694              | 9559288         | 54112        |               |
| pkP5142             | 9559299         | 11           |               |
| pkP661              | 9559301         | 2            |               |
| uCE1-1032           | 9596055         | 36754        |               |
| snp_K07A1[3]        | 9607384         | 11329        |               |
| snp_K07A1[4]        | 9607407         | 23           |               |
| snp_K07A1[6]        | 9611860         | 4453         |               |
| uCE1-1040           | 9667316         | 55456        |               |
| pkP5125             | 9730066         | 62750        |               |
| pkP658              | 9730068         | 2            |               |
| uCE1-1045           | 9731699         | 1631         |               |
| snp_K02A11[1]       | 9747092         | 15393        |               |
| <b>snp_F26E4[4]</b> | <b>9799636</b>  | <b>52544</b> | <b>ZH1-23</b> |
| snp_F26E4[5]        | 9800776         | 1140         |               |
| snp_F35C12[1]       | 9806591         | 5815         |               |
| snp_F35C12[3]       | 9815991         | 9400         |               |
| pkP662              | 9837794         | 21803        |               |
| pkP5505             | 9919872         | 82078        |               |
| pkP780              | 9919921         | 49           |               |
| pkP600              | 9925385         | 5464         |               |
| snp_B0379[1]        | 10101936        | 176551       |               |
| pkP948              | 10251948        | 150012       |               |
| pkP500              | 10536362        | 284414       |               |
| pkP911              | 10540391        | 4029         |               |
| snp_F25H2[1]        | 10547677        | 7286         |               |
| snp_B0511[1]        | 10640223        | 92546        |               |
| pkP973              | 10706656        | 66433        |               |
| snp_B0205[1]        | 10714404        | 7748         |               |
| <b>snp_B0205[2]</b> | <b>10714726</b> | <b>322</b>   | <b>ZH1-15</b> |
| pkP5079             | 10757138        | 42412        |               |
| snp_W02B9[4]        | 11089437        | 332299       |               |
| pkP677              | 11149862        | 60425        |               |
| uCE1-1143           | 11220037        | 70175        |               |

|                       |                 |               |               |
|-----------------------|-----------------|---------------|---------------|
| uCE1-1144             | 11220086        | 49            |               |
| <b>snp_H25P06[2]</b>  | <b>11331205</b> | <b>111119</b> | <b>ZH1-05</b> |
| snp_M04D5[2]          | 11337898        | 6693          |               |
| snp_Y53H1C[4]         | 11423547        | 85649         |               |
| pkP5081               | 11454530        | 30983         |               |
| snp_ZK1025[3]         | 11485375        | 30845         |               |
| snp_K08C9[2]          | 11502483        | 17108         |               |
| uCE1-1165             | 11535376        | 32893         |               |
| uCE1-1168             | 11609124        | 73748         |               |
| uCE1-1178             | 11666098        | 56974         |               |
| uCE1-1193             | 11780610        | 114512        |               |
| pkP806                | 11789522        | 8912          |               |
| uCE1-1202             | 11813841        | 24319         |               |
| snp_R06C1[1]          | 11930744        | 116903        |               |
| snp_R06C1[6]          | 11943599        | 12855         |               |
| snp_R06C1[7]          | 11943687        | 88            |               |
| snp_Y53C10[6]         | 11964877        | 21190         |               |
| pkP964                | 12030642        | 65765         |               |
| pkP5067               | 12030645        | 3             |               |
| snp_Y53C10[8]         | 12037177        | 6532          |               |
| snp_F58D5[2]          | 12055424        | 18247         |               |
| snp_F58D5[3]          | 12055516        | 92            |               |
| snp_F58D5[4]          | 12055727        | 211           |               |
| snp_F58D5[5]          | 12055827        | 100           |               |
| snp_F58D5[6]          | 12055918        | 91            |               |
| snp_F58D5[10]         | 12060729        | 4811          |               |
| snp_Y47H10[3]         | 12101344        | 40615         |               |
| pkP786                | 12112444        | 11100         |               |
| uCE1-1230             | 12119748        | 7304          |               |
| uCE1-1232             | 12119841        | 93            |               |
| uCE1-1240             | 12120052        | 211           |               |
| pkP840                | 12131141        | 11089         |               |
| pkP5062               | 12131147        | 6             |               |
| uCE1-1251             | 12133061        | 1914          |               |
| snp_F15H9[3]          | 12159556        | 26495         |               |
| snp_R05D7[2]          | 12173284        | 13728         |               |
| snp_R05D7[3]          | 12181594        | 8310          |               |
| snp_R05D7[5]          | 12181695        | 101           |               |
| snp_R05D7[6]          | 12181739        | 44            |               |
| uCE1-1258             | 12211319        | 29580         |               |
| pkP5133               | 12266061        | 54742         |               |
| <b>snp_F56H6[4]</b>   | <b>12297522</b> | <b>31461</b>  | <b>ZH1-08</b> |
| uCE1-1281             | 12341002        | 43480         |               |
| snp_T15D6[2]          | 12391433        | 50431         |               |
| uCE1-1307             | 12464724        | 73291         |               |
| snp_T27F6[1]          | 12489219        | 24495         |               |
| snp_K11D2[2]          | 12513943        | 24724         |               |
| uCE1-1313             | 12517856        | 3913          |               |
| pkP984                | 12546877        | 29021         |               |
| snp_T07D10[7]         | 12618470        | 71593         |               |
| snp_T07D10[8]         | 12618535        | 65            |               |
| snp_T07D10[9]         | 12618666        | 131           |               |
| snp_T07D10[17]        | 12634657        | 15991         |               |
| uCE1-1351             | 12662760        | 28103         |               |
| uCE1-1353             | 12683202        | 20442         |               |
| snp_Y18D10[1]         | 12815266        | 132064        |               |
| snp_Y18D10[4]         | 12831001        | 15735         |               |
| <b>snp_Y18D10[5]</b>  | <b>12831064</b> | <b>63</b>     | <b>ZH1-09</b> |
| snp_F08A8[2]          | 12955715        | 124651        |               |
| uCE1-1394             | 13004498        | 48783         |               |
| uCE1-1397             | 13036302        | 31804         |               |
| snp_W05B5[2]          | 13045114        | 8812          |               |
| snp_W05B5[3]          | 13053203        | 8089          |               |
| snp_W05B5[4]          | 13053570        | 367           |               |
| pkP5294               | 13054508        | 938           |               |
| uCE1-1398             | 13072577        | 18069         |               |
| snp_Y26D4[2]          | 13092697        | 20120         |               |
| pkP5063               | 13099701        | 7004          |               |
| pkP589                | 13099817        | 116           |               |
| uCE1-1401             | 13148849        | 49032         |               |
| snp_ZK1225[2]         | 13215608        | 66759         |               |
| snp_ZK1053[1]         | 13239798        | 24190         |               |
| uCE1-1419             | 13302215        | 62417         |               |
| uCE1-1430             | 13426848        | 124633        |               |
| snp_Y87G2[2]          | 13520505        | 93657         |               |
| <b>snp_Y87G2[5]</b>   | <b>13520509</b> | <b>4</b>      | <b>ZH1-06</b> |
| snp_Y87G2[6]          | 13555708        | 35199         |               |
| snp_Y87G2[7]          | 13563507        | 7799          |               |
| snp_Y87G2[8]          | 13563782        | 275           |               |
| snp_W09C5[2]          | 13654551        | 90769         |               |
| snp_W09C5[6]          | 13658235        | 3684          |               |
| snp_W04A4[3]          | 13700209        | 41974         |               |
| snp_Y6B3B[5]          | 13759352        | 59143         |               |
| snp_Y6B3B[8]          | 13759892        | 540           |               |
| snp_W09G3[2]          | 13811626        | 51734         |               |
| uCE1-1469             | 13824445        | 12819         |               |
| uCE1-1473             | 13835277        | 10832         |               |
| uCE1-1475             | 13835412        | 135           |               |
| uCE1-1480             | 13839843        | 4431          |               |
| <b>snp_Y71A12B[2]</b> | <b>13903448</b> | <b>63605</b>  | <b>ZH1-24</b> |
| snp_Y71A12B[6]        | 13936523        | 33075         |               |

|                 |          |        |
|-----------------|----------|--------|
| snp_Y71A12B[10] | 13962586 | 26063  |
| snp_Y71A12B[12] | 13962590 | 4      |
| snp_Y71A12B[14] | 13997916 | 35326  |
| snp_Y63D3[1]    | 14105158 | 107242 |
| snp_Y63D3[5]    | 14108608 | 3450   |
| snp_ZK849[1]    | 14197066 | 88458  |
| snp_ZK849[2]    | 14197101 | 35     |
| snp_C49A1[4]    | 14233584 | 36483  |
| uCE1-1517       | 14238345 | 4761   |
| snp_C49A1[5]    | 14246019 | 7674   |
| pkP638          | 14269486 | 23467  |
| uCE1-1531       | 14315424 | 45938  |
| uCE1-1536       | 14319843 | 4419   |
| snp_Y105E8[1]   | 14345119 | 25276  |
| uCE1-1545       | 14354956 | 9837   |
| snp_Y105E8[4]   | 14441981 | 87025  |
| snp_Y105E8[7]   | 14471366 | 29385  |
| snp_Y105E8[8]   | 14475574 | 4208   |
| snp_Y105E8[9]   | 14478119 | 2545   |
| snp_Y105E8[12]  | 14522468 | 44349  |
| snp_Y105E8[14]  | 14548559 | 26091  |
| snp_Y105E8B[1]  | 14629567 | 81008  |
| snp_Y105E8B[2]  | 14629739 | 172    |
| snp_K05C4[7]    | 14755624 | 125885 |
| uCE1-1571       | 14775468 | 19844  |
| snp_F39B2[1]    | 14785716 | 10248  |
| snp_Y54E5B[2]   | 14821362 | 35646  |
| pkP628          | 14861007 | 39645  |
| pkP5036         | 14877706 | 16699  |
| uCE1-1589       | 14907845 | 30139  |
| uCE1-1595       | 14913217 | 5372   |
| uCE1-1598       | 14914484 | 1267   |
| pkP5104         | 14925535 | 11051  |
| pkP963          | 14937685 | 12150  |
| snp_ZK909[1]    | 14958713 | 21028  |
| pkP809          | 14960488 | 1775   |
| pkP5320         | 14969576 | 9088   |
| snp_ZK909[3]    | 14976505 | 6929   |
| pkP5213         | 14978344 | 1839   |
| pkP633          | 14978360 | 16     |
| pkP829          | 14992612 | 14252  |
| pkP5123         | 15001277 | 8665   |
| pkP700          | 15001285 | 8      |
| pkP646          | 15003663 | 2378   |
| snp_ZK337[1]    | 15012909 | 9246   |
| snp_ZK337[4]    | 15013311 | 402    |
| snp_ZK337[6]    | 15013383 | 72     |
| pkP5233         | 15073823 | 60440  |
| snp_F31C3[3]    | 15076101 | 2278   |
