# Supplementary material for: A universal method for automated gene mapping
Source: PubMed Central journal article supplement (PMC551539; doi:10.1186/gb-2005-6-2-r19), 2005-01-17
Supplement: gb-2005-6-2-r19-s13.pdf [file gb-2005-6-2-r19-s13.pdf]

**Supplementary Table 5:  
Predicted *C. elegans* InDels LGII**

(Validated FLP assays are shown in blue)

| WormBase SNP        | Position on Chromosome (nt) | Distance between InDels (nt) | Assay Name     |
|---------------------|-----------------------------|------------------------------|----------------|
| uCE2-506            | 97837                       | -                            |                |
| snp_T25D3[3]        | 149696                      | 51859                        |                |
| snp_C41D7[1]        | 356968                      | 207272                       |                |
| snp_C41D7[3]        | 359065                      | 2097                         |                |
| snp_C41D7[4]        | 359254                      | 189                          |                |
| snp_C41D7[5]        | 359289                      | 35                           |                |
| snp_C03H5[2]        | 401057                      | 41768                        |                |
| uCE2-519            | 417497                      | 16440                        |                |
| snp_W10D9[1]        | 454697                      | 37200                        |                |
| snp_W10D9[2]        | 454980                      | 283                          |                |
| snp_W07E6[3]        | 485685                      | 30705                        |                |
| <b>snp_W07E6[7]</b> | <b>492112</b>               | <b>6427</b>                  | <b>ZH2-15</b>  |
| uCE2-544            | 596594                      | 104482                       |                |
| snp_T04B8[1]        | 614781                      | 18187                        |                |
| snp_T02H6[3]        | 721949                      | 107168                       |                |
| snp_T02H6[4]        | 722036                      | 87                           |                |
| pkP898              | 785974                      | 63938                        |                |
| pkP867              | 785999                      | 25                           |                |
| pkP517              | 786000                      | 1                            |                |
| snp_F28A10[1]       | 837224                      | 51224                        |                |
| uCE2-548            | 863591                      | 26367                        |                |
| uCE2-553            | 880593                      | 17002                        |                |
| pkP653              | 894216                      | 13623                        |                |
| pkP5115             | 895827                      | 1611                         |                |
| uCE2-555            | 897376                      | 1549                         |                |
| uCE2-571            | 922436                      | 25060                        |                |
| uCE2-573            | 922744                      | 308                          |                |
| snp_R07C3[4]        | 939538                      | 16794                        |                |
| <b>snp_C32B5[2]</b> | <b>951699</b>               | <b>12161</b>                 | <b>ZH2-04a</b> |
| uCE2-583            | 951701                      | 2                            |                |
| pkP676              | 953821                      | 2120                         |                |
| pkP5160             | 953824                      | 3                            |                |
| uCE2-584            | 954916                      | 1092                         |                |
| uCE2-588            | 955125                      | 209                          |                |
| uCE2-589            | 960262                      | 5137                         |                |
| uCE2-593            | 974155                      | 13893                        |                |
| uCE2-600            | 1001847                     | 27692                        |                |
| uCE2-614            | 1002092                     | 245                          |                |
| snp_M01D1[4]        | 1028847                     | 26755                        |                |
| uCE2-634            | 1040704                     | 11857                        |                |
| uCE2-650            | 1041026                     | 322                          |                |
| uCE2-651            | 1041046                     | 20                           |                |
| uCE2-654            | 1043306                     | 2260                         |                |
| uCE2-661            | 1046181                     | 2875                         |                |
| uCE2-665            | 1046268                     | 87                           |                |
| uCE2-713            | 1160878                     | 114610                       |                |
| snp_T23F4[1]        | 1173535                     | 12657                        |                |
| uCE2-732            | 1245170                     | 71635                        |                |
| snp_Y57G7[4]        | 1301701                     | 56531                        |                |
| uCE2-752            | 1332986                     | 31285                        |                |
| snp_F56D12[4]       | 1343235                     | 10249                        |                |
| uCE2-755            | 1348089                     | 4854                         |                |
| snp_Y51H7D[2]       | 1361716                     | 13627                        |                |
| snp_F54D12[4]       | 1365966                     | 4250                         |                |
| snp_F54D12[5]       | 1365975                     | 9                            |                |
| uCE2-773            | 1580725                     | 214750                       |                |
| pkP5005             | 1601444                     | 20719                        |                |
| pkP531              | 1601447                     | 3                            |                |
| uCE2-837            | 1654810                     | 53363                        |                |
| snp_F58E1[3]        | 1684180                     | 29370                        |                |
| uCE2-845            | 1710314                     | 26134                        |                |
| uCE2-846            | 1710513                     | 199                          |                |
| pkP5217             | 1724743                     | 14230                        |                |
| pkP5250             | 1724751                     | 8                            |                |
| pkP5290             | 1724753                     | 2                            |                |
| pkP985              | 1724753                     | 0                            |                |
| snp_F36H5[1]        | 1748089                     | 23336                        |                |
| pkP5084             | 1865381                     | 117292                       |                |
| pkP561              | 1865384                     | 3                            |                |
| pkP673              | 1937093                     | 71709                        |                |
| pkP707              | 1937105                     | 12                           |                |
| pkP761              | 1937184                     | 79                           |                |
| uCE2-957            | 1941671                     | 4487                         |                |
| snp_ZK250[3]        | 1942168                     | 497                          |                |
| snp_ZK250[4]        | 1942197                     | 29                           |                |
| <b>snp_R52[2]</b>   | <b>2105518</b>              | <b>163321</b>                | <b>ZH2-05</b>  |
| snp_Y59C2[3]        | 2218627                     | 113109                       |                |
| uCE2-993            | 2255074                     | 36447                        |                |
| snp_F53G2[2]        | 2452655                     | 197581                       |                |
| snp_F53G2[3]        | 2452677                     | 22                           |                |
| uCE2-1114           | 2460017                     | 7340                         |                |
| pkP987              | 2493562                     | 33545                        |                |

|                      |                |               |                |
|----------------------|----------------|---------------|----------------|
| snp_F09D1[3]         | 2575309        | 81747         |                |
| uCE2-1128            | 2637426        | 62117         |                |
| pkP5307              | 2693365        | 55939         |                |
| snp_T05A8[1]         | 2716394        | 23029         |                |
| snp_Y47G7[2]         | 2745229        | 28835         |                |
| uCE2-1142            | 2752257        | 7028          |                |
| <b>np133</b>         | <b>2769668</b> | <b>17411</b>  | <b>ZH2-16</b>  |
| snp_F08D12[13]       | 2796991        | 27323         |                |
| uCE2-1159            | 2809020        | 12029         |                |
| uCE2-1168            | 2836441        | 27421         |                |
| snp_Y110A2AL[5]      | 2859617        | 23176         |                |
| pkP2140              | 2873438        | 13821         |                |
| snp_Y110A2AL[11]     | 2873822        | 384           |                |
| uCE2-1174            | 2882602        | 8780          |                |
| uCE2-1186            | 2887693        | 5091          |                |
| uCE2-1204            | 2947686        | 59993         |                |
| snp_B0454[4]         | 3037357        | 89671         |                |
| uCE2-1225            | 3081104        | 43747         |                |
| snp_Y25C1[11]        | 3114847        | 33743         |                |
| uCE2-1256            | 3158034        | 43187         |                |
| snp_Y27F2[2]         | 3185048        | 27014         |                |
| <b>snp_F39E9[2]</b>  | <b>3311548</b> | <b>126500</b> | <b>ZH2-06a</b> |
| uCE2-1272            | 3318033        | 6485          |                |
| uCE2-1274            | 3318186        | 153           |                |
| snp_T06D4[1]         | 3389787        | 71601         |                |
| snp_C16C8[2]         | 3445484        | 55697         |                |
| snp_C16C8[3]         | 3445754        | 270           |                |
| uCE2-1335            | 3446821        | 1067          |                |
| snp_C16C8[5]         | 3447039        | 218           |                |
| uCE2-1338            | 3448111        | 1072          |                |
| snp_Y49F6B[1]        | 3499701        | 51590         |                |
| snp_Y49F6B[2]        | 3499719        | 18            |                |
| uCE2-1376            | 3576891        | 77172         |                |
| uCE2-1390            | 3609891        | 33000         |                |
| uCE2-1393            | 3629156        | 19265         |                |
| snp_M151[1]          | 3634502        | 5346          |                |
| uCE2-1404            | 3681064        | 46562         |                |
| uCE2-1415            | 3681273        | 209           |                |
| snp_F40H7[1]         | 3694626        | 13353         |                |
| pkP5163              | 3760855        | 66229         |                |
| snp_F54D10[3]        | 3811481        | 50626         |                |
| snp_F53C3[2]         | 3898925        | 87444         |                |
| snp_F53C3[4]         | 3915114        | 16189         |                |
| snp_F53C3[5]         | 3915252        | 138           |                |
| snp_K10G6[2]         | 3976400        | 61148         |                |
| snp_Y14H12[1]        | 3988499        | 12099         |                |
| snp_Y14H12[2]        | 3996029        | 7530          |                |
| pkP5273              | 4016787        | 20758         |                |
| <b>snp_K07D4[1]</b>  | <b>4032873</b> | <b>16086</b>  | <b>ZH2-07</b>  |
| uCE2-1526            | 4104572        | 71699         |                |
| uCE2-1527            | 4104616        | 44            |                |
| uCE2-1533            | 4108962        | 4346          |                |
| uCE2-1542            | 4117875        | 8913          |                |
| uCE2-1551            | 4145184        | 27309         |                |
| snp_R03H10[2]        | 4153146        | 7962          |                |
| pkP5030              | 4211369        | 58223         |                |
| pkP5235              | 4211440        | 71            |                |
| uCE2-1560            | 4340881        | 129441        |                |
| snp_B0286[1]         | 4383987        | 43106         |                |
| snp_B0286[2]         | 4384137        | 150           |                |
| pkP682               | 4389403        | 5266          |                |
| pkP632               | 4442464        | 53061         |                |
| uCE2-1576            | 4465446        | 22982         |                |
| snp_T05C1[1]         | 4476856        | 11410         |                |
| pkP5322              | 4482970        | 6114          |                |
| uCE2-1580            | 4626107        | 143137        |                |
| uCE2-1581            | 4661975        | 35868         |                |
| <b>snp_F10G7[4]</b>  | <b>4689731</b> | <b>27756</b>  | <b>ZH2-17</b>  |
| uCE2-1594            | 4846067        | 156336        |                |
| snp_F11G11[1]        | 4855708        | 9641          |                |
| pkP617               | 4897028        | 41320         |                |
| snp_F59A6[4]         | 5013275        | 116247        |                |
| snp_C27A2[1]         | 5078124        | 64849         |                |
| snp_F58A6[1]         | 5140103        | 61979         |                |
| snp_C34F11[5]        | 5218939        | 78836         |                |
| snp_C34F11[6]        | 5225632        | 6693          |                |
| <b>snp_C54A12[4]</b> | <b>5276767</b> | <b>51135</b>  | <b>ZH2-13</b>  |
| snp_F07F6[1]         | 5437847        | 161080        |                |
| pkP5017              | 5445285        | 7438          |                |
| snp_C17G10[1]        | 5590878        | 145593        |                |
| uCE2-1643            | 5860742        | 269864        |                |
| snp_F55C12[1]        | 5865654        | 4912          |                |
| snp_F55C12[2]        | 5865689        | 35            |                |
| snp_F55C12[4]        | 5887353        | 21664         |                |
| pkP597               | 5954430        | 67077         |                |
| uCE2-1655            | 6084901        | 130471        |                |
| pkP5001              | 6171346        | 86445         |                |
| snp_C30B5[1]         | 6199228        | 27882         |                |
| snp_F13H8[1]         | 6255758        | 56530         |                |
| <b>snp_F13H8[2]</b>  | <b>6256072</b> | <b>314</b>    | <b>ZH2-19</b>  |
| pkP5007              | 6264980        | 8908          |                |

|                      |                 |              |               |
|----------------------|-----------------|--------------|---------------|
| pkP738               | 6264986         | 6            |               |
| uCE2-1659            | 6268998         | 4012         |               |
| uCE2-1662            | 6381981         | 112983       |               |
| snp_T28D9[2]         | 6493319         | 111338       |               |
| snp_R05G9R[2]        | 6507969         | 14650        |               |
| snp_R05G9R[5]        | 6508586         | 617          |               |
| uCE2-1669            | 6536429         | 27843        |               |
| snp_C56E6[1]         | 6539459         | 3030         |               |
| uCE2-1670            | 6560238         | 20779        |               |
| uCE2-1672            | 6561612         | 1374         |               |
| snp_F54H5[1]         | 6631960         | 70348        |               |
| snp_C18H9[1]         | 6678941         | 46981        |               |
| uCE2-1680            | 6777131         | 98190        |               |
| uCE2-1693            | 6860367         | 83236        |               |
| snp_C44B7[3]         | 6891538         | 31171        |               |
| uCE2-1698            | 6943032         | 51494        |               |
| snp_C15F1[2]         | 6958536         | 15504        |               |
| uCE2-1705            | 7040865         | 82329        |               |
| pkP5162              | 7171672         | 130807       |               |
| pkP5179              | 7270260         | 98588        |               |
| <b>snp_C30G12[2]</b> | <b>7288476</b>  | <b>18216</b> | <b>ZH2-01</b> |
| uCE2-1726            | 7291804         | 3328         |               |
| uCE2-1734            | 7338713         | 46909        |               |
| pkP5070              | 7518208         | 179495       |               |
| snp_C28F5[1]         | 7521396         | 3188         |               |
| pkP504               | 7569786         | 48390        |               |
| pkP5391              | 7657264         | 87478        |               |
| uCE2-1751            | 7669909         | 12645        |               |
| uCE2-1754            | 7670179         | 270          |               |
| uCE2-1762            | 7691814         | 21635        |               |
| snp_B0495[5]         | 7718834         | 27020        |               |
| snp_C06A8[2]         | 7787176         | 68342        |               |
| snp_C06A8[3]         | 7798113         | 10937        |               |
| <b>snp_T05A6[1]</b>  | <b>7812597</b>  | <b>14484</b> | <b>ZH2-02</b> |
| uCE2-1766            | 7896130         | 83533        |               |
| snp_ZK675[1]         | 7907599         | 11469        |               |
| snp_ZK669[1]         | 7926911         | 19312        |               |
| snp_DH11[2]          | 7994951         | 68040        |               |
| pkP5241              | 8061477         | 66526        |               |
| snp_T05H10[1]        | 8061881         | 404          |               |
| snp_K02C4[1]         | 8078163         | 16282        |               |
| snp_F14F11[3]        | 8318797         | 240634       |               |
| pkP5009              | 8382126         | 63329        |               |
| pkP5184              | 8434851         | 52725        |               |
| snp_F28C6[1]         | 8596249         | 161398       |               |
| uCE2-1799            | 8606673         | 10424        |               |
| <b>snp_F28C6[3]</b>  | <b>8612029</b>  | <b>5356</b>  | <b>ZH2-20</b> |
| snp_F28C6[7]         | 8612043         | 14           |               |
| snp_T01B7[2]         | 8712887         | 100844       |               |
| snp_K08F8[1]         | 8748241         | 35354        |               |
| snp_F07H5[2]         | 8784191         | 35950        |               |
| pkP605               | 8819568         | 35377        |               |
| snp_T07D4[1]         | 8867971         | 48403        |               |
| uCE2-1805            | 8896583         | 28612        |               |
| uCE2-1808            | 8980608         | 84025        |               |
| snp_F37B12[1]        | 9030066         | 49458        |               |
| uCE2-1812            | 9062842         | 32776        |               |
| snp_T24B8[3]         | 9063641         | 799          |               |
| snp_Y9C2U[2]         | 9147410         | 83769        |               |
| snp_Y9C2U[3]         | 9147697         | 287          |               |
| <b>snp_T23G7[2]</b>  | <b>9183058</b>  | <b>35361</b> | <b>ZH2-25</b> |
| uCE2-1834            | 9225830         | 42772        |               |
| snp_C01G6[1]         | 9266874         | 41044        |               |
| snp_C01G6[4]         | 9274482         | 7608         |               |
| pkP955               | 9300427         | 25945        |               |
| pkP5073              | 9300430         | 3            |               |
| snp_F42A8[1]         | 9341514         | 41084        |               |
| pkP5187              | 9380473         | 38959        |               |
| pkP746               | 9476394         | 95921        |               |
| pkP5170              | 9522885         | 46491        |               |
| pkP515               | 9569270         | 46385        |               |
| pkP5299              | 9589599         | 20329        |               |
| snp_Y53C12B[1]       | 9739559         | 149960       |               |
| uCE2-1867            | 9782353         | 42794        |               |
| pkP735               | 9863370         | 81017        |               |
| pkP758               | 9863547         | 177          |               |
| uCE2-1872            | 9964661         | 101114       |               |
| pkP2128              | 9974009         | 9348         |               |
| pkP2131              | 10122983        | 148974       |               |
| uCE2-1895            | 10430269        | 307286       |               |
| snp_E04D5[2]         | 10433171        | 2902         |               |
| uCE2-1898            | 10437443        | 4272         |               |
| pkP2071              | 10497785        | 60342        |               |
| <b>snp_R166[4]</b>   | <b>10527682</b> | <b>29897</b> | <b>ZH2-27</b> |
| snp_R166[7]          | 10541680        | 13998        |               |
| snp_R166[5]          | 10541692        | 12           |               |
| snp_R166[6]          | 10541705        | 13           |               |
| uCE2-1914            | 10547923        | 6218         |               |
| snp_C14A4[1]         | 10612827        | 64904        |               |
| snp_C14A4[2]         | 10613014        | 187          |               |
| snp_M28[1]           | 10620583        | 7569         |               |

|                      |                 |              |               |
|----------------------|-----------------|--------------|---------------|
| snp_M28[3]           | 10636647        | 16064        |               |
| uCE2-1921            | 10682103        | 45456        |               |
| uCE2-1924            | 10686077        | 3974         |               |
| uCE2-1925            | 10686081        | 4            |               |
| pkP613               | 10717821        | 31740        |               |
| snp_F44F4[2]         | 10904044        | 186223       |               |
| snp_F44F4[7]         | 10914491        | 10447        |               |
| uCE2-1953            | 11013911        | 99420        |               |
| uCE2-1959            | 11102433        | 88522        |               |
| snp_W10C6[1]         | 11112472        | 10039        |               |
| snp_F37H8[2]         | 11181022        | 68550        |               |
| uCE2-1963            | 11194986        | 13964        |               |
| snp_F37H8[5]         | 11196919        | 1933         |               |
| snp_F37H8[6]         | 11200479        | 3560         |               |
| snp_F37H8[10]        | 11202381        | 1902         |               |
| uCE2-1964            | 11207611        | 5230         |               |
| snp_F37H8[13]        | 11211956        | 4345         |               |
| uCE2-1979            | 11248882        | 36926        |               |
| uCE2-1981            | 11258656        | 9774         |               |
| pkP5291              | 11285493        | 26837        |               |
| uCE2-2001            | 11328227        | 42734        |               |
| pkP5144              | 11336041        | 7814         |               |
| uCE2-2002            | 11337805        | 1764         |               |
| uCE2-2003            | 11337900        | 95           |               |
| <b>snp_B0491[2]</b>  | <b>11359409</b> | <b>21509</b> | <b>ZH2-09</b> |
| snp_W02B12[11]       | 11464057        | 104648       |               |
| pkP5172              | 11513675        | 49618        |               |
| pkP645               | 11513677        | 2            |               |
| uCE2-2018            | 11589515        | 75838        |               |
| pkP5190              | 11618546        | 29031        |               |
| uCE2-2021            | 11635289        | 16743        |               |
| snp_ZK20[2]          | 11635939        | 650          |               |
| uCE2-2029            | 11711655        | 75716        |               |
| uCE2-2035            | 11717727        | 6072         |               |
| <b>snp_F43G6[3]</b>  | <b>11805581</b> | <b>87854</b> | <b>ZH2-28</b> |
| snp_T27D12[11]       | 11847551        | 41970        |               |
| snp_ZK930[1]         | 11881394        | 33843        |               |
| snp_ZK930[5]         | 11881778        | 384          |               |
| uCE2-2049            | 11889656        | 7878         |               |
| uCE2-2053            | 11910397        | 20741        |               |
| uCE2-2054            | 11910420        | 23           |               |
| snp_Y17G7[1]         | 11917811        | 7391         |               |
| snp_W03C9[2]         | 11933690        | 15879        |               |
| snp_W03C9[3]         | 11934427        | 737          |               |
| snp_W03C9[6]         | 11962048        | 27621        |               |
| snp_Y17G7B[3]        | 11992569        | 30521        |               |
| snp_Y17G7B[5]        | 12015395        | 22826        |               |
| snp_Y17G7B[6]        | 12015668        | 273          |               |
| snp_Y17G7B[8]        | 12019557        | 3889         |               |
| snp_Y17G7B[10]       | 12019691        | 134          |               |
| snp_Y17G7B[15]       | 12029311        | 9620         |               |
| snp_Y17G7B[17]       | 12043495        | 14184        |               |
| snp_Y17G7B[20]       | 12043742        | 247          |               |
| uCE2-2083            | 12113119        | 69377        |               |
| uCE2-2085            | 12120946        | 7827         |               |
| uCE2-2087            | 12121104        | 158          |               |
| snp_Y57A10[4]        | 12157271        | 36167        |               |
| snp_Y57A10[7]        | 12271356        | 114085       |               |
| snp_Y57A10[16]       | 12291749        | 20393        |               |
| snp_Y57A10[17]       | 12291849        | 100          |               |
| snp_Y57A10B[4]       | 12373114        | 81265        |               |
| snp_Y57A10B[7]       | 12378329        | 5215         |               |
| snp_Y57A10C[1]       | 12419061        | 40732        |               |
| snp_F15A4[2]         | 12471354        | 52293        |               |
| pkP634               | 12522263        | 50909        |               |
| uCE2-2120            | 12524599        | 2336         |               |
| pkP656               | 12540721        | 16122        |               |
| pkP5137              | 12547484        | 6763         |               |
| uCE2-2129            | 12579132        | 31648        |               |
| uCE2-2131            | 12605350        | 26218        |               |
| <b>snp_Y38E10[3]</b> | <b>12630557</b> | <b>25207</b> | <b>ZH2-10</b> |
| uCE2-2135            | 12638486        | 7929         |               |
| snp_Y46G5[1]         | 12683341        | 44855        |               |
| snp_Y46G5[3]         | 12683408        | 67           |               |
| uCE2-2143            | 12704278        | 20870        |               |
| uCE2-2145            | 12704328        | 50           |               |
| uCE2-2146            | 12731333        | 27005        |               |
| snp_Y46G5[7]         | 12760621        | 29288        |               |
| snp_Y46G5[8]         | 12760667        | 46           |               |
| uCE2-2152            | 12949655        | 188988       |               |
| snp_Y38F1[4]         | 12954721        | 5066         |               |
| snp_Y38F1[5]         | 12989672        | 34951        |               |
| snp_Y38F1[9]         | 12992659        | 2987         |               |
| snp_Y38F1[15]        | 13009120        | 16461        |               |
| uCE2-2163            | 13023490        | 14370        |               |
| snp_F18A11[1]        | 13034910        | 11420        |               |
| snp_F42G4[3]         | 13063662        | 28752        |               |
| snp_F42G4[4]         | 13063702        | 40           |               |
| snp_F42G4[5]         | 13067250        | 3548         |               |
| snp_F42G4[6]         | 13073584        | 6334         |               |
| snp_F29C12[5]        | 13103563        | 29979        |               |

|                      |                 |              |               |
|----------------------|-----------------|--------------|---------------|
| uCE2-2173            | 13123522        | 19959        |               |
| snp_W09H1[2]         | 13179006        | 55484        |               |
| snp_W09E7[2]         | 13204912        | 25906        |               |
| snp_F15D4[5]         | 13224179        | 19267        |               |
| uCE2-2204            | 13261186        | 37007        |               |
| uCE2-2217            | 13261408        | 222          |               |
| snp_Y48C3[7]         | 13277106        | 15698        |               |
| uCE2-2219            | 13279224        | 2118         |               |
| snp_Y48C3[8]         | 13286388        | 7164         |               |
| snp_Y48C3[16]        | 13324803        | 38415        |               |
| snp_Y48C3[20]        | 13334605        | 9802         |               |
| snp_Y48C3[19]        | 13334676        | 71           |               |
| snp_Y48C3[29]        | 13367259        | 32583        |               |
| snp_Y48C3[35]        | 13389058        | 21799        |               |
| uCE2-2228            | 13410180        | 21122        |               |
| snp_E01G4[3]         | 13469334        | 59154        |               |
| pkP5171              | 13502686        | 33352        |               |
| <b>snp_F54F11[3]</b> | <b>13507241</b> | <b>4555</b>  | <b>ZH2-11</b> |
| snp_Y48E1B[8]        | 13534983        | 27742        |               |
| pkP2152              | 13551141        | 16158        |               |
| pkP5272              | 13590439        | 39298        |               |
| pkP5078              | 13590551        | 112          |               |
| uCE2-2249            | 13601053        | 10502        |               |
| snp_F37B1[1]         | 13617239        | 16186        |               |
| snp_Y48E1[1]         | 13681635        | 64396        |               |
| snp_Y54G9[1]         | 13697879        | 16244        |               |
| snp_Y54G9[3]         | 13722152        | 24273        |               |
| snp_Y54G9[4]         | 13728728        | 6576         |               |
| uCE2-2260            | 13729094        | 366          |               |
| snp_R06B9[2]         | 13750257        | 21163        |               |
| uCE2-2263            | 13786635        | 36378        |               |
| snp_Y51H1[2]         | 13886964        | 100329       |               |
| snp_F01D5[5]         | 14014324        | 127360       |               |
| uCE2-2287            | 14035762        | 21438        |               |
| <b>snp_W01G7[2]</b>  | <b>14045121</b> | <b>9359</b>  | <b>ZH2-12</b> |
| uCE2-2292            | 14112068        | 66947        |               |
| uCE2-2293            | 14132752        | 20684        |               |
| snp_Y48B6[4]         | 14249035        | 116283       |               |
| snp_R06A4[1]         | 14360165        | 111130       |               |
| snp_K04B12[1]        | 14426865        | 66700        |               |
| uCE2-2319            | 14452054        | 25189        |               |
| uCE2-2322            | 14453753        | 1699         |               |
| snp_Y54G11B[2]       | 14461900        | 8147         |               |
| pkP2160              | 14477693        | 15793        |               |
| pkP941               | 14480980        | 3287         |               |
| uCE2-2329            | 14491110        | 10130        |               |
| snp_F57C2[3]         | 14523899        | 32789        |               |
| <b>snp_C04H5[1]</b>  | <b>14534168</b> | <b>10269</b> | <b>ZH2-23</b> |
| pkP624               | 14551462        | 17294        |               |
| snp_F19H8[2]         | 14614139        | 62677        |               |
| snp_C38C6[3]         | 14633989        | 19850        |               |
| uCE2-2340            | 14664515        | 30526        |               |
| uCE2-2349            | 14682280        | 17765        |               |
| snp_C09F9[1]         | 14702226        | 19946        |               |
| snp_C09F9[2]         | 14703838        | 1612         |               |
| snp_C09F9[4]         | 14703931        | 93           |               |
| uCE2-2364            | 14757525        | 53594        |               |
| uCE2-2368            | 14796051        | 38526        |               |
| uCE2-2370            | 14800038        | 3987         |               |
| snp_R05H10[2]        | 14830518        | 30480        |               |
| snp_R05H10[3]        | 14866657        | 36139        |               |
| snp_Y53F4[1]         | 14879713        | 13056        |               |
| pkP5258              | 14884584        | 4871         |               |
| pkP982               | 14885838        | 1254         |               |
| uCE2-2390            | 14970182        | 84344        |               |
| snp_Y53F4B[9]        | 15056878        | 86696        |               |
| uCE2-2399            | 15101231        | 44353        |               |
| uCE2-2402            | 15101343        | 112          |               |
| snp_Y46E12BM[1]      | 15212418        | 111075       |               |
| pkP5275              | 15214135        | 1717         |               |
| pkP607               | 15272637        | 58502        |               |
