# Supplementary material for: A universal method for automated gene mapping
Source: PubMed Central journal article supplement (PMC551539; doi:10.1186/gb-2005-6-2-r19), 2005-01-17
Supplement: gb-2005-6-2-r19-s14.pdf [file gb-2005-6-2-r19-s14.pdf]

**Supplementary Table 6:  
Predicted *C. elegans* InDels LGIII**

(Validated FLP assays are shown in blue)

| WormBase SNP           | Position on Chromosome (nt) | Distance between InDels (nt) | Assay Name     |
|------------------------|-----------------------------|------------------------------|----------------|
| uCE3-513               | 33731                       | -                            |                |
| uCE3-514               | 33733                       | 2                            |                |
| uCE3-566               | 138432                      | 104699                       |                |
| snp_K10F12[1]          | 360475                      | 222043                       |                |
| <b>snp_Y55B1BM[1]</b>  | <b>416788</b>               | <b>56313</b>                 | <b>ZH3-17a</b> |
| snp_Y55B1BR[2]         | 439866                      | 23078                        |                |
| pkP737                 | 447883                      | 8017                         |                |
| pkP5194                | 447886                      | 3                            |                |
| snp_F10C5[1]           | 480806                      | 32920                        |                |
| snp_F10C5[2]           | 480821                      | 15                           |                |
| uCE3-596               | 513501                      | 32680                        |                |
| uCE3-597               | 513527                      | 26                           |                |
| snp_T22F7[4]           | 527346                      | 13819                        |                |
| snp_T22F7[6]           | 542885                      | 15539                        |                |
| snp_B0353[1]           | 548853                      | 5968                         |                |
| pkP3082                | 593140                      | 44287                        |                |
| uCE3-604               | 596607                      | 3467                         |                |
| uCE3-612               | 617817                      | 21210                        |                |
| pkP5296                | 757704                      | 139887                       |                |
| snp_F42G9[1]           | 762554                      | 4850                         |                |
| uCE3-620               | 811729                      | 49175                        |                |
| snp_K02F3[1]           | 824859                      | 13130                        |                |
| uCE3-629               | 919876                      | 95017                        |                |
| uCE3-669               | 966881                      | 47005                        |                |
| snp_R06B10[1]          | 1002515                     | 35634                        |                |
| uCE3-684               | 1010023                     | 7508                         |                |
| <b>snp_Y34F4[2]</b>    | <b>1012306</b>              | <b>2283</b>                  | <b>ZH3-25</b>  |
| pkP631                 | 1021122                     | 8816                         |                |
| pkP5103                | 1021268                     | 146                          |                |
| snp_BE0003N10[7]       | 1059457                     | 38189                        |                |
| uCE3-693               | 1061377                     | 1920                         |                |
| uCE3-697               | 1149536                     | 88159                        |                |
| snp_Y92C3[2]           | 1169701                     | 20165                        |                |
| snp_Y119D3B[3]         | 1199822                     | 30121                        |                |
| snp_Y82E9BL[4]         | 1334582                     | 134760                       |                |
| snp_Y82E9BR[2]         | 1444255                     | 109673                       |                |
| snp_Y22D7AL[5]         | 1619936                     | 175681                       |                |
| uCE3-720               | 1623833                     | 3897                         |                |
| snp_Y22D7AL[7]         | 1664214                     | 40381                        |                |
| snp_Y22D7AL[8]         | 1664321                     | 107                          |                |
| snp_Y46E12[2]          | 1753859                     | 89538                        |                |
| <b>snp_Y46E12[6]</b>   | <b>1765177</b>              | <b>11318</b>                 | <b>ZH3-06</b>  |
| uCE3-723               | 1765994                     | 817                          |                |
| uCE3-726               | 1800038                     | 34044                        |                |
| uCE3-727               | 1800361                     | 323                          |                |
| uCE3-728               | 1803786                     | 3425                         |                |
| snp_B0524[2]           | 1892903                     | 89117                        |                |
| uCE3-740               | 1924014                     | 31111                        |                |
| snp_F53A3[4]           | 1953982                     | 29968                        |                |
| uCE3-744               | 1954789                     | 807                          |                |
| snp_Y39A3B[1]          | 1991227                     | 36438                        |                |
| snp_M01E10[4]          | 2044589                     | 53362                        |                |
| uCE3-749               | 2071599                     | 27010                        |                |
| snp_Y48G9[1]           | 2091327                     | 19728                        |                |
| pkP5189                | 2119181                     | 27854                        |                |
| pkP5323                | 2119181                     | 0                            |                |
| pkP728                 | 2121004                     | 1823                         |                |
| <b>snp_Y54F10BM[9]</b> | <b>2328170</b>              | <b>207166</b>                | <b>ZH3-07</b>  |
| pkP3091                | 2356926                     | 28756                        |                |
| pkP3092                | 2357075                     | 149                          |                |
| uCE3-756               | 2419416                     | 62341                        |                |
| pkP5316                | 2432743                     | 13327                        |                |
| snp_E02H9[7]           | 2450932                     | 18189                        |                |
| uCE3-760               | 2453398                     | 2466                         |                |
| uCE3-763               | 2487617                     | 34219                        |                |
| snp_Y71H2B[3]          | 2599711                     | 112094                       |                |
| snp_Y71H2B[4]          | 2622862                     | 23151                        |                |
| snp_Y71H2B[6]          | 2622941                     | 79                           |                |
| uCE3-775               | 2655179                     | 32238                        |                |
| snp_Y71H2AL[2]         | 2683109                     | 27930                        |                |
| snp_Y71H2AL[3]         | 2686253                     | 3144                         |                |
| snp_Y71H2AM[1]         | 2705802                     | 19549                        |                |
| uCE3-790               | 2813200                     | 107398                       |                |
| snp_Y71H2AM[5]         | 2820248                     | 7048                         |                |
| snp_Y71H2AM[9]         | 2823416                     | 3168                         |                |
| snp_Y71H2AM[12]        | 2823857                     | 441                          |                |
| snp_Y71H2AM[14]        | 2823984                     | 127                          |                |
| uCE3-793               | 2888949                     | 64965                        |                |
| snp_F56F11[2]          | 2892486                     | 3537                         |                |
| snp_H05C05[3]          | 2945810                     | 53324                        |                |

|                      |                |              |                |
|----------------------|----------------|--------------|----------------|
| snp_H05C05[4]        | 2961628        | 15818        |                |
| <b>snp_H05C05[5]</b> | <b>2961870</b> | <b>242</b>   | <b>ZH3-08</b>  |
| pkP724               | 3057240        | 95370        |                |
| uCE3-809             | 3067442        | 10202        |                |
| snp_C44B11[1]        | 3144827        | 77385        |                |
| snp_C44B11[2]        | 3144993        | 166          |                |
| snp_C44B11[3]        | 3155107        | 10114        |                |
| snp_C44B11[5]        | 3164312        | 9205         |                |
| snp_H09G03[3]        | 3202404        | 38092        |                |
| uCE3-815             | 3226966        | 24562        |                |
| snp_Y53G8AL[1]       | 3242309        | 15343        |                |
| uCE3-823             | 3331238        | 88929        |                |
| uCE3-831             | 3418406        | 87168        |                |
| snp_K01A11[1]        | 3439224        | 20818        |                |
| snp_K01A11[2]        | 3439251        | 27           |                |
| <b>snp_K01A11[3]</b> | <b>3441912</b> | <b>2661</b>  | <b>ZH3-26</b>  |
| snp_M01F1[1]         | 3520032        | 78120        |                |
| snp_C54C6[1]         | 3548049        | 28017        |                |
| snp_C48D5[2]         | 3564730        | 16681        |                |
| snp_C48D5[7]         | 3567836        | 3106         |                |
| uCE3-836             | 3574926        | 7090         |                |
| uCE3-839             | 3640946        | 66020        |                |
| pkP698               | 3643575        | 2629         |                |
| pkP958               | 3752376        | 108801       |                |
| snp_ZK1058[1]        | 3912036        | 159660       |                |
| snp_ZK1058[2]        | 3923254        | 11218        |                |
| uCE3-848             | 3967322        | 44068        |                |
| uCE3-854             | 3992711        | 25389        |                |
| pkP753               | 4073230        | 80519        |                |
| snp_R10E4[2]         | 4279671        | 206441       |                |
| <b>snp_H38K22[1]</b> | <b>4305611</b> | <b>25940</b> | <b>ZH3-28</b>  |
| uCE3-864             | 4347365        | 41754        |                |
| pkP524               | 4658420        | 311055       |                |
| uCE3-871             | 4685358        | 26938        |                |
| pkP689               | 4689683        | 4325         |                |
| snp_T04A8[1]         | 4704742        | 15059        |                |
| uCE3-874             | 4708950        | 4208         |                |
| uCE3-879             | 4791474        | 82524        |                |
| <b>snp_F26A1[2]</b>  | <b>4822073</b> | <b>30599</b> | <b>ZH3-15</b>  |
| snp_C26E6[2]         | 4940855        | 118782       |                |
| uCE3-886             | 5013120        | 72265        |                |
| snp_K10D2[2]         | 5188550        | 175430       |                |
| snp_T15B12[1]        | 5292947        | 104397       |                |
| pkP783               | 5376075        | 83128        |                |
| pkP936               | 5376085        | 10           |                |
| uCE3-897             | 5382008        | 5923         |                |
| pkP5161              | 5473519        | 91511        |                |
| uCE3-906             | 5479497        | 5978         |                |
| snp_C05D2[1]         | 5618848        | 139351       |                |
| snp_C05D2[2]         | 5619288        | 440          |                |
| snp_F54E7[4]         | 5666140        | 46852        |                |
| uCE3-924             | 5685784        | 19644        |                |
| uCE3-925             | 5695323        | 9539         |                |
| uCE3-927             | 5706403        | 11080        |                |
| <b>snp_B0336[6]</b>  | <b>5726718</b> | <b>20315</b> | <b>ZH3-04</b>  |
| pkP5176              | 5846472        | 119754       |                |
| snp_F25B5[1]         | 5949546        | 103074       |                |
| uCE3-943             | 5978772        | 29226        |                |
| snp_T04C9[2]         | 5988608        | 9836         |                |
| uCE3-948             | 6144499        | 155891       |                |
| uCE3-949             | 6195419        | 50920        |                |
| snp_T12A2[1]         | 6233130        | 37711        |                |
| uCE3-950             | 6305028        | 71898        |                |
| snp_C56G2[2]         | 6354331        | 49303        |                |
| pkP601               | 6361299        | 6968         |                |
| snp_C16A3[2]         | 6399865        | 38566        |                |
| snp_C09E7[1]         | 6539546        | 139681       |                |
| pkP625               | 6585061        | 45515        |                |
| pkP721               | 6647336        | 62275        |                |
| snp_M01G4[1]         | 6670564        | 23228        |                |
| uCE3-958             | 6689451        | 18887        |                |
| snp_F37A4[1]         | 6690436        | 985          |                |
| snp_F37A4[2]         | 6690447        | 11           |                |
| snp_F37A4[4]         | 6709451        | 19004        |                |
| uCE3-977             | 6951778        | 242327       |                |
| snp_F11H8[2]         | 7033995        | 82217        |                |
| pkP3103              | 7130638        | 96643        |                |
| pkP598               | 7210641        | 80003        |                |
| <b>snp_T21D11[2]</b> | <b>7260267</b> | <b>49626</b> | <b>ZH3-02</b>  |
| uCE3-1001            | 7272182        | 11915        |                |
| snp_B0361[2]         | 7289916        | 17734        |                |
| snp_B0361[6]         | 7299400        | 9484         |                |
| uCE3-1013            | 7387427        | 88027        |                |
| uCE3-1027            | 7712930        | 325503       |                |
| <b>snp_ZK686[3]</b>  | <b>7772487</b> | <b>59557</b> | <b>ZH3-05a</b> |
| snp_ZK686[6]         | 7772951        | 464          |                |
| snp_C27D11[3]        | 7821076        | 48125        |                |
| uCE3-1041            | 7822731        | 1655         |                |
| uCE3-1043            | 7828937        | 6206         |                |
| snp_ZK688[3]         | 7909137        | 80200        |                |
| uCE3-1052            | 7949925        | 40788        |                |

|                      |                 |              |                |
|----------------------|-----------------|--------------|----------------|
| uCE3-1054            | 7952087         | 2162         |                |
| snp_C30A5[1]         | 8214538         | 262451       |                |
| uCE3-1063            | 8272321         | 57783        |                |
| uCE3-1066            | 8324717         | 52396        |                |
| snp_C04D8[3]         | 8505942         | 181225       |                |
| snp_C04D8[5]         | 8512789         | 6847         |                |
| snp_F22B7[1]         | 8641925         | 129136       |                |
| uCE3-1081            | 8643040         | 1115         |                |
| <b>snp_F22B7[1]</b>  | <b>8691426</b>  | <b>48386</b> | <b>ZH3-32</b>  |
| uCE3-1085            | 8692042         | 616          |                |
| snp_F44E2[1]         | 8846515         | 154473       |                |
| snp_K01F9[1]         | 8880095         | 33580        |                |
| snp_ZK637[1]         | 8904225         | 24130        |                |
| snp_ZK637[2]         | 8904472         | 247          |                |
| snp_ZK643[1]         | 8935374         | 30902        |                |
| snp_ZK643[3]         | 8959874         | 24500        |                |
| snp_ZK643[3]         | 8959874         | 0            |                |
| snp_ZK643[4]         | 8960287         | 413          |                |
| <b>snp_F59B2[1]</b>  | <b>9021169</b>  | <b>60882</b> | <b>ZH3-35</b>  |
| uCE3-1095            | 9242561         | 221392       |                |
| uCE3-1100            | 9281086         | 38525        |                |
| snp_C40H1[3]         | 9328240         | 47154        |                |
| uCE3-1102            | 9343296         | 15056        |                |
| snp_F55H2[1]         | 9519920         | 176624       |                |
| snp_ZK1098[2]        | 9547167         | 27247        |                |
| snp_F58A4[1]         | 9622150         | 74983        |                |
| snp_C15H7[2]         | 9639394         | 17244        |                |
| uCE3-1115            | 9699809         | 60415        |                |
| snp_K11H3[2]         | 9853498         | 153689       |                |
| snp_K03H1[1]         | 9947496         | 93998        |                |
| uCE3-1131            | 10031240        | 83744        |                |
| <b>snp_T16G12[2]</b> | <b>10054064</b> | <b>22824</b> | <b>ZH3-10a</b> |
| uCE3-1135            | 10091061        | 36997        |                |
| uCE3-1137            | 10100786        | 9725         |                |
| uCE3-1139            | 10100852        | 66           |                |
| uCE3-1141            | 10101059        | 207          |                |
| uCE3-1144            | 10106220        | 5161         |                |
| snp_T20G5[1]         | 10188944        | 82724        |                |
| uCE3-1145            | 10213724        | 24780        |                |
| pkP921               | 10232742        | 19018        |                |
| pkP555               | 10232743        | 1            |                |
| snp_T07A5[2]         | 10316663        | 83920        |                |
| uCE3-1167            | 10514375        | 197712       |                |
| uCE3-1170            | 10522339        | 7964         |                |
| snp_T21C12[6]        | 10541589        | 19250        |                |
| snp_Y39A1[8]         | 10648550        | 106961       |                |
| uCE3-1184            | 10649315        | 765          |                |
| uCE3-1188            | 10658999        | 9684         |                |
| <b>snp_W09D10[3]</b> | <b>10712445</b> | <b>53446</b> | <b>ZH3-23</b>  |
| uCE3-1199            | 10818078        | 105633       |                |
| uCE3-1203            | 10866843        | 48765        |                |
| snp_C44B9[1]         | 10885472        | 18629        |                |
| uCE3-1211            | 11046648        | 161176       |                |
| uCE3-1213            | 11079968        | 33320        |                |
| snp_W09D6[1]         | 11080292        | 324          |                |
| snp_Y47D3[9]         | 11200270        | 119978       |                |
| snp_Y47D3[12]        | 11211671        | 11401        |                |
| snp_Y47D3[16]        | 11249254        | 37583        |                |
| snp_Y47D3[19]        | 11262469        | 13215        |                |
| uCE3-1227            | 11291573        | 29104        |                |
| snp_Y47D3[20]        | 11335629        | 44056        |                |
| snp_Y47D3B[1]        | 11398988        | 63359        |                |
| <b>snp_Y47D3B[3]</b> | <b>11399237</b> | <b>249</b>   | <b>ZH3-11</b>  |
| snp_Y47D3B[9]        | 11413561        | 14324        |                |
| snp_Y47D3B[11]       | 11427189        | 13628        |                |
| snp_Y47D3B[14]       | 11439774        | 12585        |                |
| snp_Y47D3B[17]       | 11443790        | 4016         |                |
| snp_Y47D3B[23]       | 11465650        | 21860        |                |
| uCE3-1238            | 11473559        | 7909         |                |
| snp_Y66A7AL[1]       | 11473572        | 13           |                |
| snp_Y66A7AL[3]       | 11473778        | 206          |                |
| uCE3-1243            | 11527317        | 53539        |                |
| snp_Y66D12[5]        | 11591915        | 64598        |                |
| snp_Y66D12[6]        | 11591927        | 12           |                |
| uCE3-1249            | 11614812        | 22885        |                |
| snp_Y66A7AR[1]       | 11616400        | 1588         |                |
| snp_Y66A7AR[4]       | 11622027        | 5627         |                |
| snp_Y41C4[1]         | 11647111        | 25084        |                |
| snp_Y41C4[3]         | 11678036        | 30925        |                |
| snp_Y41C4[6]         | 11684500        | 6464         |                |
| snp_Y41C4[7]         | 11684614        | 114          |                |
| snp_Y41C4[12]        | 11745100        | 60486        |                |
| snp_Y41C4[14]        | 11766672        | 21572        |                |
| pkP5180              | 11782040        | 15368        |                |
| uCE3-1267            | 11801402        | 19362        |                |
| uCE3-1268            | 11809018        | 7616         |                |
| uCE3-1271            | 11810432        | 1414         |                |
| uCE3-1276            | 11819615        | 9183         |                |
| uCE3-1278            | 11825534        | 5919         |                |
| snp_Y56A3[1]         | 11834656        | 9122         |                |
| snp_Y56A3[2]         | 11834816        | 160          |                |

|                      |                 |              |               |
|----------------------|-----------------|--------------|---------------|
| snp_Y56A3[4]         | 11834893        | 77           |               |
| snp_Y56A3[5]         | 11834977        | 84           |               |
| uCE3-1295            | 11938100        | 103123       |               |
| pkP678               | 11960300        | 22200        |               |
| <b>snp_Y56A3[16]</b> | <b>11961081</b> | <b>781</b>   | <b>ZH3-12</b> |
| pkP577               | 12239191        | 278110       |               |
| snp_Y75B8[10]        | 12302315        | 63124        |               |
| pkP674               | 12328072        | 25757        |               |
| pkP691               | 12328073        | 1            |               |
| snp_Y49E10[1]        | 12373466        | 45393        |               |
| uCE3-1326            | 12375191        | 1725         |               |
| uCE3-1327            | 12375239        | 48           |               |
| uCE3-1330            | 12375449        | 210          |               |
| snp_Y49E10[6]        | 12383864        | 8415         |               |
| snp_Y49E10[16]       | 12472865        | 89001        |               |
| snp_Y111B2[3]        | 12496414        | 23549        |               |
| snp_Y111B2[5]        | 12514734        | 18320        |               |
| snp_Y111B2[6]        | 12514745        | 11           |               |
| snp_Y111B2[4]        | 12514802        | 57           |               |
| <b>snp_Y111B2[7]</b> | <b>12528166</b> | <b>13364</b> | <b>ZH3-13</b> |
| snp_Y111B2[8]        | 12528219        | 53           |               |
| snp_Y111B2[11]       | 12540909        | 12690        |               |
| snp_Y111B2[12]       | 12583536        | 42627        |               |
| snp_Y111B2[15]       | 12583675        | 139          |               |
| snp_Y111B2[24]       | 12607719        | 24044        |               |
| uCE3-1346            | 12608492        | 773          |               |
| snp_Y111B2[25]       | 12617233        | 8741         |               |
| uCE3-1357            | 12690132        | 72899        |               |
| uCE3-1359            | 12690342        | 210          |               |
| uCE3-1361            | 12714346        | 24004        |               |
| snp_BE10[6]          | 12815920        | 101574       |               |
| pkP516               | 12865040        | 49120        |               |
| pkP5003              | 12866649        | 1609         |               |
| snp_Y37D8[2]         | 12889026        | 22377        |               |
| snp_Y37D8[3]         | 12889036        | 10           |               |
| snp_Y39E4[3]         | 12952845        | 63809        |               |
| snp_Y39E4[7]         | 12964685        | 11840        |               |
| snp_Y39E4[8]         | 12967380        | 2695         |               |
| snp_Y39E4[9]         | 12967490        | 110          |               |
| pkP5191              | 12983325        | 15835        |               |
| snp_ZK1010[1]        | 13008996        | 25671        |               |
| snp_ZK1010[2]        | 13008998        | 2            |               |
| snp_F14F7[3]         | 13020591        | 11593        |               |
| snp_F14F7[5]         | 13020750        | 159          |               |
| snp_F14F7[9]         | 13030895        | 10145        |               |
| snp_F14F7[10]        | 13031201        | 306          |               |
| pkP5185              | 13052990        | 21789        |               |
| pkP679               | 13052991        | 1            |               |
| pkP5011              | 13054631        | 1640         |               |
| pkP510               | 13054634        | 3            |               |
| snp_F54F12[8]        | 13058806        | 4172         |               |
| uCE3-1391            | 13106958        | 48152        |               |
| pkP774               | 13230714        | 123756       |               |
| snp_F56A8[2]         | 13253152        | 22438        |               |
| snp_F56A8[3]         | 13277823        | 24671        |               |
| snp_T03F6[2]         | 13363592        | 85769        |               |
| uCE3-1401            | 13515833        | 152241       |               |
| uCE3-1412            | 13591099        | 75266        |               |
| snp_ZK525[1]         | 13661021        | 69922        |               |
| snp_ZK525[2]         | 13662035        | 1014         |               |
| uCE3-1419            | 13668790        | 6755         |               |
| pkP755               | 13699628        | 30838        |               |
| snp_W06F12[1]        | 13730985        | 31357        |               |
| snp_W06F12[2]        | 13730987        | 2            |               |
| snp_W06F12[3]        | 13731298        | 311          |               |
