# Supplementary material for: A universal method for automated gene mapping
Source: PubMed Central journal article supplement (PMC551539; doi:10.1186/gb-2005-6-2-r19), 2005-01-17
Supplement: gb-2005-6-2-r19-s15.pdf [file gb-2005-6-2-r19-s15.pdf]

**Supplementary Table 7:  
Predicted *C. elegans* InDels LGIV**

(Validated FLP assays are shown in blue)

| WormBase SNP          | Position on Chromosome (nt) | Distance between InDels (nt) | Assay Name     |
|-----------------------|-----------------------------|------------------------------|----------------|
| pkP659                | 343527                      | -                            |                |
| pkP5041               | 648670                      | 305143                       |                |
| uCE4-515              | 795461                      | 146791                       |                |
| snp_Y55F3BR[3]        | 850766                      | 55305                        |                |
| <b>snp_Y55F3BR[6]</b> | <b>851112</b>               | <b>346</b>                   | <b>ZH4-04a</b> |
| snp_Y55F3BR[9]        | 876560                      | 25448                        |                |
| snp_Y55F3BR[11]       | 876859                      | 299                          |                |
| snp_F58H7[1]          | 926402                      | 49543                        |                |
| pkP5072               | 951635                      | 25233                        |                |
| uCE4-523              | 970165                      | 18530                        |                |
| snp_Y55F3AM[2]        | 998230                      | 28065                        |                |
| snp_F53H1[3]          | 1303617                     | 305387                       |                |
| pkP506                | 1336791                     | 33174                        |                |
| snp_C07B3[1]          | 1381390                     | 44599                        |                |
| uCE4-542              | 1421693                     | 40303                        |                |
| uCE4-555              | 1445526                     | 23833                        |                |
| snp_Y77E11[8]         | 1468313                     | 22787                        |                |
| uCE4-562              | 1471878                     | 3565                         |                |
| uCE4-563              | 1479581                     | 7703                         |                |
| uCE4-568              | 1490217                     | 10636                        |                |
| pkP762                | 1516442                     | 26225                        |                |
| pkP763                | 1516442                     | 0                            |                |
| pkP732                | 1516531                     | 89                           |                |
| snp_K03H6[5]          | 1545757                     | 29226                        |                |
| snp_Y41D4B[7]         | 1657546                     | 111789                       |                |
| uCE4-595              | 1720581                     | 63035                        |                |
| snp_K08D12[1]         | 1721822                     | 1241                         |                |
| snp_K08D12[2]         | 1726772                     | 4950                         |                |
| <b>snp_Y41D4[3]</b>   | <b>1740251</b>              | <b>13479</b>                 | <b>ZH4-05</b>  |
| snp_Y41D4[5]          | 1751451                     | 11200                        |                |
| snp_Y41D4[7]          | 1776140                     | 24689                        |                |
| snp_Y38C1B[1]         | 1798725                     | 22585                        |                |
| pkP5135               | 1893337                     | 94612                        |                |
| snp_F55A8[1]          | 1895197                     | 1860                         |                |
| uCE4-608              | 1917378                     | 22181                        |                |
| snp_F52C12[2]         | 1925697                     | 8319                         |                |
| snp_F52C12[4]         | 1925899                     | 202                          |                |
| uCE4-612              | 1925901                     | 2                            |                |
| snp_F52C12[6]         | 1942856                     | 16955                        |                |
| snp_F52C12[7]         | 1943053                     | 197                          |                |
| snp_Y76B12C[2]        | 2006809                     | 63756                        |                |
| snp_Y76B12C[3]        | 2006895                     | 86                           |                |
| snp_Y76B12C[7]        | 2007176                     | 281                          |                |
| uCE4-622              | 2075050                     | 67874                        |                |
| snp_R05C11[4]         | 2075396                     | 346                          |                |
| snp_R05C11[5]         | 2075563                     | 167                          |                |
| uCE4-624              | 2077894                     | 2331                         |                |
| uCE4-625              | 2077904                     | 10                           |                |
| snp_R05C11[9]         | 2084172                     | 6268                         |                |
| snp_C54E4[2]          | 2155922                     | 71750                        |                |
| uCE4-630              | 2191571                     | 35649                        |                |
| uCE4-638              | 2192046                     | 475                          |                |
| snp_Y71G10AR[10]      | 2211321                     | 19275                        |                |
| snp_T04C4[2]          | 2221999                     | 10678                        |                |
| snp_T04C4[4]          | 2222112                     | 113                          |                |
| uCE4-653              | 2249865                     | 27753                        |                |
| snp_C37F5[4]          | 2276919                     | 27054                        |                |
| snp_C37F5[5]          | 2276938                     | 19                           |                |
| snp_C37F5[10]         | 2287057                     | 10119                        |                |
| snp_C37F5[14]         | 2288836                     | 1779                         |                |
| snp_Y38F2AL[7]        | 2327429                     | 38593                        |                |
| snp_Y38F2AR[1]        | 2395493                     | 68064                        |                |
| uCE4-671              | 2457353                     | 61860                        |                |
| pkP5013               | 2486726                     | 29373                        |                |
| snp_Y69A2AR[9]        | 2605436                     | 118710                       |                |
| snp_Y69A2AR[10]       | 2605442                     | 6                            |                |
| snp_Y69A2AR[15]       | 2641144                     | 35702                        |                |
| snp_Y69A2AR[17]       | 2641304                     | 160                          |                |
| snp_Y94H6[1]          | 2685005                     | 43701                        |                |
| uCE4-685              | 2707865                     | 22860                        |                |
| uCE4-689              | 2728544                     | 20679                        |                |
| snp_Y54G2[1]          | 2751474                     | 22930                        |                |
| <b>snp_Y54G2[2]</b>   | <b>2758615</b>              | <b>7141</b>                  | <b>ZH4-06</b>  |
| snp_Y54G2[7]          | 2761694                     | 3079                         |                |
| snp_Y54G2[11]         | 2827196                     | 65502                        |                |
| snp_Y54G2[20]         | 2863176                     | 35980                        |                |
| uCE4-699              | 2914263                     | 51087                        |                |
| pkP5257               | 2924441                     | 10178                        |                |
| snp_Y54G2[32]         | 2959569                     | 35128                        |                |
| snp_Y54G2[35]         | 2985599                     | 26030                        |                |
| uCE4-711              | 3075303                     | 89704                        |                |

|                      |                |               |               |
|----------------------|----------------|---------------|---------------|
| pkP975               | 3083506        | 8203          |               |
| snp_Y67D8C[13]       | 3103368        | 19862         |               |
| snp_Y67D8C[14]       | 3103687        | 319           |               |
| snp_Y67D8B[3]        | 3181339        | 77652         |               |
| uCE4-717             | 3191606        | 10267         |               |
| snp_Y67D8B[6]        | 3192517        | 911           |               |
| snp_M4[1]            | 3210951        | 18434         |               |
| uCE4-742             | 3298860        | 87909         |               |
| pkP583               | 3328946        | 30086         |               |
| snp_F42A6[4]         | 3354162        | 25216         |               |
| snp_C04C3[4]         | 3423528        | 69366         |               |
| snp_C04C3[7]         | 3423934        | 406           |               |
| snp_C04C3[8]         | 3423978        | 44            |               |
| uCE4-754             | 3454928        | 30950         |               |
| uCE4-761             | 3464645        | 9717          |               |
| uCE4-764             | 3502591        | 37946         |               |
| snp_Y37E11C[2]       | 3517982        | 15391         |               |
| snp_ZC416[1]         | 3636105        | 118123        |               |
| snp_ZC416[2]         | 3636486        | 381           |               |
| snp_Y37E11AL[3]      | 3687373        | 50887         |               |
| uCE4-793             | 3689883        | 2510          |               |
| uCE4-800             | 3765229        | 75346         |               |
| uCE4-808             | 3790205        | 24976         |               |
| uCE4-811             | 3790470        | 265           |               |
| uCE4-820             | 3903860        | 113390        |               |
| pkP522               | 3986839        | 82979         |               |
| snp_F47C12[4]        | 3993642        | 6803          |               |
| pkP602               | 4006080        | 12438         |               |
| snp_W03D2[1]         | 4051055        | 44975         |               |
| snp_W03D2[2]         | 4051205        | 150           |               |
| uCE4-844             | 4056225        | 5020          |               |
| snp_W03D2[5]         | 4073991        | 17766         |               |
| uCE4-863             | 4173254        | 99263         |               |
| <b>snp_K06B9[6]</b>  | <b>4212198</b> | <b>38944</b>  | <b>ZH4-07</b> |
| uCE4-876             | 4258280        | 46082         |               |
| snp_F15E6[2]         | 4285492        | 27212         |               |
| <b>snp_F28E10[1]</b> | <b>4581704</b> | <b>296212</b> | <b>ZH4-16</b> |
| pkP4035              | 5061512        | 479808        |               |
| pkP759               | 5157290        | 95778         |               |
| uCE4-912             | 5190677        | 33387         |               |
| snp_F36H12[3]        | 5277130        | 86453         |               |
| pkP5243              | 5304500        | 27370         |               |
| snp_ZK354[1]         | 5308929        | 4429          |               |
| snp_Y4C6B[1]         | 5337761        | 28832         |               |
| snp_F41H10[1]        | 5373774        | 36013         |               |
| uCE4-915             | 5463472        | 89698         |               |
| snp_T12E12[1]        | 5541287        | 77815         |               |
| uCE4-917             | 5544804        | 3517          |               |
| snp_T12E12[2]        | 5561674        | 16870         |               |
| snp_T12E12[3]        | 5561988        | 314           |               |
| uCE4-919             | 5722646        | 160658        |               |
| uCE4-923             | 5760219        | 37573         |               |
| <b>snp_F44E8[2]</b>  | <b>5766666</b> | <b>6447</b>   | <b>ZH4-08</b> |
| uCE4-927             | 5779451        | 12785         |               |
| snp_C31H1[2]         | 5782062        | 2611          |               |
| pkP513               | 5795619        | 13557         |               |
| snp_H04M03[1]        | 5887494        | 91875         |               |
| snp_K08B4[1]         | 6077556        | 190062        |               |
| snp_C49A9[1]         | 6208978        | 131422        |               |
| snp_C49A9[2]         | 6212702        | 3724          |               |
| uCE4-946             | 6215053        | 2351          |               |
| uCE4-947             | 6217919        | 2866          |               |
| snp_Y73B6BL[5]       | 6399193        | 181274        |               |
| snp_Y73B6BL[7]       | 6414285        | 15092         |               |
| uCE4-951             | 6445877        | 31592         |               |
| uCE4-952             | 6447450        | 1573          |               |
| snp_Y73B6BL[8]       | 6460112        | 12662         |               |
| snp_Y73B6BL[9]       | 6460259        | 147           |               |
| snp_Y73B6BR[1]       | 6502095        | 41836         |               |
| pkP701               | 6532549        | 30454         |               |
| uCE4-958             | 6591127        | 58578         |               |
| uCE4-962             | 6641456        | 50329         |               |
| snp_C17H12[1]        | 6811992        | 170536        |               |
| snp_H20E11[1]        | 6827182        | 15190         |               |
| <b>snp_T22D1[1]</b>  | <b>6926779</b> | <b>99597</b>  | <b>ZH4-02</b> |
| snp_C34D4[1]         | 7137860        | 211081        |               |
| uCE4-977             | 7144697        | 6837          |               |
| pkP5276              | 7281552        | 136855        |               |
| pkP5024              | 7434288        | 152736        |               |
| snp_B0496[2]         | 7444469        | 10181         |               |
| <b>snp_F55G1[7]</b>  | <b>7500574</b> | <b>56105</b>  | <b>ZH4-03</b> |
| snp_R05G6[4]         | 7507574        | 7000          |               |
| snp_R05G6[6]         | 7517162        | 9588          |               |
| uCE4-991             | 7535964        | 18802         |               |
| uCE4-993             | 7553246        | 17282         |               |
| snp_F45E4[2]         | 7627927        | 74681         |               |
| snp_F45E4[3]         | 7628008        | 81            |               |
| snp_F45E4[6]         | 7642093        | 14085         |               |
| snp_C08G9[1]         | 7676588        | 34495         |               |
| pkP664               | 8029872        | 353284        |               |
| <b>snp_C18F3[1]</b>  | <b>8058041</b> | <b>28169</b>  | <b>ZH4-17</b> |

|                      |                 |               |                |
|----------------------|-----------------|---------------|----------------|
| pkP672               | 8150283         | 92242         |                |
| uCE4-1026            | 8270504         | 120221        |                |
| snp_K07H8[1]         | 8271492         | 988           |                |
| uCE4-1048            | 8419362         | 147870        |                |
| pkP512               | 8534818         | 115456        |                |
| uCE4-1057            | 8560880         | 26062         |                |
| snp_F42A9[1]         | 8609542         | 48662         |                |
| <b>snp_F49C12[1]</b> | <b>9310637</b>  | <b>701095</b> | <b>ZH4-18</b>  |
| pkP5000              | 9685240         | 374603        |                |
| pkP739               | 9686848         | 1608          |                |
| pkP680               | 9686851         | 3             |                |
| pkP703               | 9686941         | 90            |                |
| pkP713               | 9686951         | 10            |                |
| pkP711               | 9686956         | 5             |                |
| uCE4-1082            | 9715775         | 28819         |                |
| snp_T13F2[3]         | 9788641         | 72866         |                |
| <b>pkP4081</b>       | <b>9834093</b>  | <b>45452</b>  | <b>ZH4-09</b>  |
| pkP5151              | 9870910         | 36817         |                |
| snp_T13H10[1]        | 9946155         | 75245         |                |
| pkP614               | 9993362         | 47207         |                |
| uCE4-1091            | 10112206        | 118844        |                |
| uCE4-1092            | 10112498        | 292           |                |
| uCE4-1103            | 10270079        | 157581        |                |
| pkP528               | 10308879        | 38800         |                |
| pkP5253              | 10429429        | 120550        |                |
| pkP576               | 10429431        | 2             |                |
| uCE4-1112            | 10514023        | 84592         |                |
| pkP5200              | 10539948        | 25925         |                |
| pkP5034              | 10539955        | 7             |                |
| snp_ZC168[1]         | 10739893        | 199938        |                |
| snp_C06G8[1]         | 10791657        | 51764         |                |
| uCE4-1119            | 10815135        | 23478         |                |
| snp_T11G6[1]         | 10862089        | 46954         |                |
| snp_ZK596[1]         | 10901386        | 39297         |                |
| <b>snp_C08F8[2]</b>  | <b>11172762</b> | <b>271376</b> | <b>ZH4-19</b>  |
| snp_F54D1[2]         | 11282581        | 109819        |                |
| snp_B0035[2]         | 11327189        | 44608         |                |
| snp_T01G1[4]         | 11359153        | 31964         |                |
| uCE4-1150            | 11640408        | 281255        |                |
| snp_T22B3[1]         | 11703149        | 62741         |                |
| pkP756               | 12056931        | 353782        |                |
| <b>snp_M18[1]</b>    | <b>12104785</b> | <b>47854</b>  | <b>ZH4-20</b>  |
| uCE4-1172            | 12167213        | 62428         |                |
| uCE4-1174            | 12202476        | 35263         |                |
| snp_C42C1[4]         | 12283691        | 81215         |                |
| snp_C42C1[6]         | 12285694        | 2003          |                |
| uCE4-1178            | 12317174        | 31480         |                |
| snp_F19B6[4]         | 12347475        | 30301         |                |
| snp_F28D1[1]         | 12380518        | 33043         |                |
| uCE4-1182            | 12451709        | 71191         |                |
| pkP570               | 12515358        | 63649         |                |
| pkP5038              | 12515359        | 1             |                |
| uCE4-1191            | 12613146        | 97787         |                |
| snp_Y55D9[1]         | 12614006        | 860           |                |
| pkP5219              | 12721944        | 107938        |                |
| pkP5234              | 12722153        | 209           |                |
| pkP5027              | 12722282        | 129           |                |
| pkP5267              | 12734153        | 11871         |                |
| pkP5247              | 12734237        | 84            |                |
| snp_F07C6[1]         | 12795236        | 60999         |                |
| <b>snp_K08D8[2]</b>  | <b>12912468</b> | <b>117232</b> | <b>ZH4-10a</b> |
| snp_F55G11[6]        | 12972376        | 59908         |                |
| uCE4-1224            | 12999769        | 27393         |                |
| uCE4-1230            | 13011281        | 11512         |                |
| uCE4-1233            | 13023025        | 11744         |                |
| snp_F09E8[1]         | 13160986        | 137961        |                |
| snp_C48D1[1]         | 13206181        | 45195         |                |
| snp_C48D1[4]         | 13214970        | 8789          |                |
| snp_C48D1[8]         | 13230590        | 15620         |                |
| snp_Y45F10[1]        | 13490851        | 260261        |                |
| pkP4090              | 13519932        | 29081         |                |
| snp_Y45F10B[3]       | 13564981        | 45049         |                |
| uCE4-1254            | 13612593        | 47612         |                |
| <b>snp_C08F11[4]</b> | <b>13629499</b> | <b>16906</b>  | <b>ZH4-21</b>  |
| snp_T23G4[1]         | 13698299        | 68800         |                |
| uCE4-1262            | 13730633        | 32334         |                |
| snp_Y45F10D[7]       | 13810104        | 79471         |                |
| snp_Y45F10D[8]       | 13810970        | 866           |                |
| uCE4-1265            | 13904267        | 93297         |                |
| uCE4-1268            | 13905498        | 1231          |                |
| snp_C27H2[2]         | 13952818        | 47320         |                |
| snp_Y37A1B[1]        | 13987300        | 34482         |                |
| uCE4-1270            | 13996132        | 8832          |                |
| snp_Y37A1B[4]        | 14009549        | 13417         |                |
| pkP767               | 14035502        | 25953         |                |
| pkP868               | 14035508        | 6             |                |
| pkP5300              | 14035520        | 12            |                |
| snp_Y37A1B[8]        | 14035883        | 363           |                |
| snp_Y37A1B[12]       | 14059204        | 23321         |                |
| snp_Y37A1B[13]       | 14059204        | 0             |                |
| snp_Y37A1B[14]       | 14059204        | 0             |                |

|                        |                 |              |               |
|------------------------|-----------------|--------------|---------------|
| uCE4-1280              | 14073746        | 14542        |               |
| snp_F52B11[3]          | 14102677        | 28931        |               |
| uCE4-1292              | 14164515        | 61838        |               |
| uCE4-1304              | 14229002        | 64487        |               |
| <b>pkP4094</b>         | <b>14245143</b> | <b>16141</b> | <b>ZH4-11</b> |
| uCE4-1308              | 14263631        | 18488        |               |
| uCE4-1310              | 14263846        | 215          |               |
| snp_Y67A10[2]          | 14318830        | 54984        |               |
| uCE4-1319              | 14333138        | 14308        |               |
| snp_Y67A10[8]          | 14380625        | 47487        |               |
| uCE4-1331              | 14419971        | 39346        |               |
| snp_LLC1[1]            | 14435305        | 15334        |               |
| pkP5033                | 14602777        | 167472       |               |
| snp_F13G11[5]          | 14620217        | 17440        |               |
| snp_F13G11[6]          | 14620595        | 378          |               |
| snp_Y57G11C[6]         | 14727772        | 107177       |               |
| uCE4-1372              | 14766349        | 38577        |               |
| uCE4-1375              | 14772173        | 5824         |               |
| snp_Y57G11C[13]        | 14808789        | 36616        |               |
| snp_Y57G11C[18]        | 14826069        | 17280        |               |
| uCE4-1386              | 14859268        | 33199        |               |
| uCE4-1387              | 14859402        | 134          |               |
| snp_Y57G11C[19]        | 14869805        | 10403        |               |
| uCE4-1393              | 14893497        | 23692        |               |
| uCE4-1400              | 14936427        | 42930        |               |
| snp_Y41E3[1]           | 14981935        | 45508        |               |
| snp_Y41E3[10]          | 15004166        | 22231        |               |
| uCE4-1416              | 15014468        | 10302        |               |
| uCE4-1417              | 15014477        | 9            |               |
| snp_M199[2]            | 15104639        | 90162        |               |
| uCE4-1427              | 15141706        | 37067        |               |
| <b>snp_Y40H7[3]</b>    | <b>15170907</b> | <b>29201</b> | <b>ZH4-12</b> |
| snp_Y40H7[5]           | 15171274        | 367          |               |
| snp_Y40H7[11]          | 15219122        | 47848        |               |
| snp_Y73F8[5]           | 15244035        | 24913        |               |
| uCE4-1428              | 15244649        | 614          |               |
| snp_Y73F8[14]          | 15274926        | 30277        |               |
| snp_Y73F8[15]          | 15274952        | 26           |               |
| snp_Y73F8[16]          | 15275133        | 181          |               |
| snp_Y73F8[17]          | 15275305        | 172          |               |
| snp_Y73F8[25]          | 15321464        | 46159        |               |
| snp_Y73F8[28]          | 15338476        | 17012        |               |
| snp_Y73F8[32]          | 15356918        | 18442        |               |
| snp_Y73F8[33]          | 15357035        | 117          |               |
| uCE4-1463              | 15522220        | 165185       |               |
| snp_Y105C5[16]         | 15851084        | 328864       |               |
| snp_Y105C5B[19]        | 15937613        | 86529        |               |
| uCE4-1505              | 15964434        | 26821        |               |
| uCE4-1507              | 15965319        | 885          |               |
| uCE4-1508              | 15965561        | 242          |               |
| snp_Y105C5B[21]        | 15967980        | 2419         |               |
| <b>snp_Y105C5B[23]</b> | <b>15968421</b> | <b>441</b>   | <b>ZH4-22</b> |
| uCE4-1514              | 15980747        | 12326        |               |
| pkP581                 | 15982070        | 1323         |               |
| pkP972                 | 16005704        | 23634        |               |
| pkP5252                | 16005757        | 53           |               |
| uCE4-1521              | 16006530        | 773          |               |
| snp_Y105C5B[36]        | 16087457        | 80927        |               |
| pkP5326                | 16092200        | 4743         |               |
| snp_Y105C5B[45]        | 16121111        | 28911        |               |
| pkP636                 | 16153204        | 32093        |               |
| snp_Y105C5B[50]        | 16155149        | 1945         |               |
| snp_Y7A9[3]            | 16189190        | 34041        |               |
| snp_Y7A9[5]            | 16189483        | 293          |               |
| snp_H25K10[2]          | 16212235        | 22752        |               |
| uCE4-1549              | 16278066        | 65831        |               |
| pkP562                 | 16332240        | 54174        |               |
| pkP545                 | 16336676        | 4436         |               |
| pkP5051                | 16336679        | 3            |               |
| snp_C35D6[2]           | 16371727        | 35048        |               |
| uCE4-1588              | 16443913        | 72186        |               |
| uCE4-1590              | 16502465        | 58552        |               |
| snp_Y51H4[8]           | 16596019        | 93554        |               |
| snp_Y51H4[12]          | 16619897        | 23878        |               |
| uCE4-1599              | 16623593        | 3696         |               |
| snp_Y51H4[21]          | 16679631        | 56038        |               |
| snp_Y51H4[22]          | 16679759        | 128          |               |
| snp_Y116A8[1]          | 16810742        | 130983       |               |
| snp_Y116A8[4]          | 16811029        | 287          |               |
| snp_T06A10[7]          | 16876994        | 65965        |               |
| uCE4-1615              | 16890397        | 13403        |               |
| snp_Y116A8C[2]         | 16950141        | 59744        |               |
| snp_Y116A8C[5]         | 17084189        | 134048       |               |
| snp_Y116A8C[9]         | 17084439        | 250          |               |
| uCE4-1626              | 17161097        | 76658        |               |
| pkP5306                | 17197490        | 36393        |               |
| uCE4-1631              | 17217269        | 19779        |               |
| uCE4-1633              | 17235347        | 18078        |               |
| uCE4-1634              | 17235739        | 392          |               |
| uCE4-1638              | 17285773        | 50034        |               |
| pkP923                 | 17306109        | 20336        |               |

|         |          |        |
|---------|----------|--------|
| pkP5102 | 17322047 | 15938  |
| pkP696  | 17322051 | 4      |
| pkP530  | 17345839 | 23788  |
| pkP5082 | 17460653 | 114814 |
