# Supplementary material for: A universal method for automated gene mapping
Source: PubMed Central journal article supplement (PMC551539; doi:10.1186/gb-2005-6-2-r19), 2005-01-17
Supplement: gb-2005-6-2-r19-s16.pdf [file gb-2005-6-2-r19-s16.pdf]

**Supplementary Table 8:  
Predicted *C. elegans* InDels LGV**

(Validated FLP assays are shown in blue)

| WormBase SNP        | Position on Chromosome (nt) | Distance between InDels (nt) | Assay Name     |
|---------------------|-----------------------------|------------------------------|----------------|
| snp_B0348[3]        | 39766                       | -                            |                |
| snp_B0348[5]        | 39828                       | 62                           |                |
| uCE5-503            | 78769                       | 38941                        |                |
| snp_W03F9[2]        | 144688                      | 65919                        |                |
| snp_W03F9[3]        | 153521                      | 8833                         |                |
| uCE5-507            | 154108                      | 587                          |                |
| uCE5-508            | 155951                      | 1843                         |                |
| snp_DC2[6]          | 230339                      | 74388                        |                |
| snp_T22H9[1]        | 331855                      | 101516                       |                |
| uCE5-533            | 535089                      | 203234                       |                |
| snp_C14C6[1]        | 555066                      | 19977                        |                |
| uCE5-588            | 593015                      | 37949                        |                |
| pkP750              | 665421                      | 72406                        |                |
| pkP5193             | 665424                      | 3                            |                |
| pkP747              | 670119                      | 4695                         |                |
| pkP5012             | 670125                      | 6                            |                |
| snp_H24O09[2]       | 724097                      | 53972                        |                |
| <b>snp_C05E4[5]</b> | <b>749319</b>               | <b>25222</b>                 | <b>ZH5-02a</b> |
| snp_R09E12[3]       | 779255                      | 29936                        |                |
| snp_R09E12[2]       | 779256                      | 1                            |                |
| uCE5-653            | 819507                      | 40251                        |                |
| snp_T02B11[6]       | 876277                      | 56770                        |                |
| uCE5-665            | 913476                      | 37199                        |                |
| uCE5-671            | 937584                      | 24108                        |                |
| snp_Y50D4C[3]       | 955887                      | 18303                        |                |
| snp_R09A1[4]        | 1013499                     | 57612                        |                |
| snp_R09A1[8]        | 1025990                     | 12491                        |                |
| snp_R09A1[10]       | 1039193                     | 13203                        |                |
| snp_R09A1[11]       | 1039197                     | 4                            |                |
| uCE5-680            | 1076959                     | 37762                        |                |
| uCE5-697            | 1124481                     | 47522                        |                |
| uCE5-710            | 1303680                     | 179199                       |                |
| uCE5-715            | 1397321                     | 93641                        |                |
| snp_R12A1[2]        | 1402692                     | 5371                         |                |
| snp_R09B5[2]        | 1459116                     | 56424                        |                |
| uCE5-722            | 1508320                     | 49204                        |                |
| <b>pkP5101</b>      | <b>1551061</b>              | <b>42741</b>                 | <b>ZH5-13</b>  |
| snp_F52F10[2]       | 1551302                     | 241                          |                |
| snp_F16B4[1]        | 1618295                     | 66993                        |                |
| uCE5-735            | 1679028                     | 60733                        |                |
| pkP5091             | 1689974                     | 10946                        |                |
| snp_Y46H3C[1]       | 1690109                     | 135                          |                |
| uCE5-739            | 1697964                     | 7855                         |                |
| snp_Y46H3C[4]       | 1706595                     | 8631                         |                |
| snp_Y46H3C[5]       | 1706628                     | 33                           |                |
| snp_Y46H3C[7]       | 1706963                     | 335                          |                |
| uCE5-753            | 1767229                     | 60266                        |                |
| snp_F36H9[1]        | 1768262                     | 1033                         |                |
| snp_F36H9[2]        | 1768534                     | 272                          |                |
| uCE5-757            | 1796652                     | 28118                        |                |
| snp_Y32G9[2]        | 1912729                     | 116077                       |                |
| snp_T06A1[2]        | 1937151                     | 24422                        |                |
| uCE5-763            | 1938040                     | 889                          |                |
| snp_F59A7[7]        | 2021412                     | 83372                        |                |
| uCE5-771            | 2074120                     | 52708                        |                |
| uCE5-774            | 2075553                     | 1433                         |                |
| <b>snp_F41B5[5]</b> | <b>2239502</b>              | <b>163949</b>                | <b>ZH5-03a</b> |
| snp_F41B5[6]        | 2239573                     | 71                           |                |
| pkP5157             | 2322267                     | 82694                        |                |
| snp_W02G9[3]        | 2682725                     | 360458                       |                |
| pkP657              | 2708519                     | 25794                        |                |
| uCE5-824            | 2717694                     | 9175                         |                |
| snp_R05D8[2]        | 2767703                     | 50009                        |                |
| snp_R05D8[3]        | 2767937                     | 234                          |                |
| snp_R05D8[6]        | 2767977                     | 40                           |                |
| snp_R05D8[10]       | 2775914                     | 7937                         |                |
| snp_F54E2[2]        | 2795896                     | 19982                        |                |
| snp_F54E2[5]        | 2799376                     | 3480                         |                |
| snp_H05B21[3]       | 2952069                     | 152693                       |                |
| snp_C44C3[3]        | 2975486                     | 23417                        |                |
| uCE5-881            | 3022472                     | 46986                        |                |
| snp_F59D6[3]        | 3028371                     | 5899                         |                |
| uCE5-887            | 3055134                     | 26763                        |                |
| uCE5-894            | 3058341                     | 3207                         |                |
| snp_C50H11[4]       | 3064879                     | 6538                         |                |
| pkP730              | 3087297                     | 22418                        |                |
| uCE5-908            | 3123727                     | 36430                        |                |
| pkP722              | 3206067                     | 82340                        |                |
| uCE5-928            | 3216396                     | 10329                        |                |
| snp_K08D9[8]        | 3218704                     | 2308                         |                |
| snp_K08D9[11]       | 3220084                     | 1380                         |                |
| snp_K08D9[12]       | 3220111                     | 27                           |                |

|                      |                |              |               |
|----------------------|----------------|--------------|---------------|
| snp_K08D9[13]        | 3220193        | 82           |               |
| snp_K08D9[14]        | 3220219        | 26           |               |
| snp_K08D9[15]        | 3220290        | 71           |               |
| snp_K08D9[20]        | 3223074        | 2784         |               |
| pkP5018              | 3252761        | 29687        |               |
| uCE5-937             | 3308461        | 55700        |               |
| uCE5-962             | 3443558        | 135097       |               |
| uCE5-980             | 3443978        | 420          |               |
| uCE5-1008            | 3471791        | 27813        |               |
| uCE5-1013            | 3529499        | 57708        |               |
| uCE5-1015            | 3541353        | 11854        |               |
| snp_T24A6[5]         | 3545339        | 3986         |               |
| pkP5131              | 3590061        | 44722        |               |
| pkP539               | 3591672        | 1611         |               |
| snp_T22F3[2]         | 3606322        | 14650        |               |
| uCE5-1040            | 3739280        | 132958       |               |
| uCE5-1046            | 3751527        | 12247        |               |
| pkP5198              | 3753102        | 1575         |               |
| pkP642               | 3768908        | 15806        |               |
| uCE5-1052            | 3770238        | 1330         |               |
| snp_R08E5[9]         | 3771515        | 1277         |               |
| uCE5-1063            | 3793994        | 22479        |               |
| uCE5-1068            | 3819886        | 25892        |               |
| snp_H10D18[9]        | 3835113        | 15227        |               |
| <b>snp_F47C10[2]</b> | <b>3848148</b> | <b>13035</b> | <b>ZH5-14</b> |
| uCE5-1072            | 3883369        | 35221        |               |
| uCE5-1098            | 3908074        | 24705        |               |
| uCE5-1155            | 3951337        | 43263        |               |
| uCE5-1162            | 3951513        | 176          |               |
| snp_B0213[3]         | 3961484        | 9971         |               |
| pkP5094              | 3989614        | 28130        |               |
| pkP675               | 3991270        | 1656         |               |
| snp_Y45G5AL[1]       | 4139631        | 148361       |               |
| uCE5-1197            | 4296565        | 156934       |               |
| snp_ZC132[2]         | 4305585        | 9020         |               |
| uCE5-1222            | 4366519        | 60934        |               |
| snp_F13A2[4]         | 4381581        | 15062        |               |
| snp_T28F12[3]        | 4529970        | 148389       |               |
| snp_F41F3[1]         | 4648904        | 118934       |               |
| pkP686               | 4936413        | 287509       |               |
| snp_C13D9[1]         | 4988672        | 52259        |               |
| snp_C13D9[4]         | 4988787        | 115          |               |
| snp_C13D9[5]         | 4988794        | 7            |               |
| snp_C13D9[6]         | 4988813        | 19           |               |
| snp_C13D9[10]        | 4996433        | 7620         |               |
| uCE5-1253            | 5032933        | 36500        |               |
| uCE5-1254            | 5032983        | 50           |               |
| uCE5-1258            | 5038382        | 5399         |               |
| snp_C04F5[1]         | 5091141        | 52759        |               |
| uCE5-1312            | 5173459        | 82318        |               |
| <b>snp_C03A7[4]</b>  | <b>5181248</b> | <b>7789</b>  | <b>ZH5-04</b> |
| snp_C03A7[5]         | 5181589        | 341          |               |
| snp_C03A7[8]         | 5185473        | 3884         |               |
| snp_C03A7[9]         | 5185476        | 3            |               |
| snp_C03A7[10]        | 5185477        | 1            |               |
| snp_C03A7[11]        | 5185486        | 9            |               |
| snp_C03A7[13]        | 5185601        | 115          |               |
| snp_C03A7[12]        | 5185655        | 54           |               |
| snp_C03A7[7]         | 5185655        | 0            |               |
| snp_Y49G5B[2]        | 5221006        | 35351        |               |
| uCE5-1319            | 5244287        | 23281        |               |
| uCE5-1352            | 5323926        | 79639        |               |
| pkP582               | 5328362        | 4436         |               |
| pkP5270              | 5360639        | 32277        |               |
| pkP612               | 5360642        | 3            |               |
| pkP922               | 5425863        | 65221        |               |
| pkP5223              | 5426077        | 214          |               |
| uCE5-1362            | 5462246        | 36169        |               |
| pkP584               | 5481775        | 19529        |               |
| snp_C18C4[1]         | 5547982        | 66207        |               |
| snp_C18C4[2]         | 5547990        | 8            |               |
| <b>snp_C18C4[3]</b>  | <b>5548085</b> | <b>95</b>    | <b>ZH5-15</b> |
| snp_C18C4[5]         | 5548827        | 742          |               |
| uCE5-1367            | 5551176        | 2349         |               |
| uCE5-1372            | 5652976        | 101800       |               |
| uCE5-1406            | 5892541        | 239565       |               |
| uCE5-1410            | 5898418        | 5877         |               |
| pkP690               | 5933366        | 34948        |               |
| snp_M03F8[1]         | 5953434        | 20068        |               |
| snp_F29G9[5]         | 6031356        | 77922        |               |
| uCE5-1417            | 6179885        | 148529       |               |
| uCE5-1420            | 6180358        | 473          |               |
| uCE5-1421            | 6180397        | 39           |               |
| uCE5-1424            | 6183713        | 3316         |               |
| uCE5-1425            | 6183724        | 11           |               |
| snp_W06H8[1]         | 6223188        | 39464        |               |
| uCE5-1430            | 6273712        | 50524        |               |
| snp_K12B6[3]         | 6302651        | 28939        |               |
| snp_T28C12[6]        | 6342374        | 39723        |               |
| snp_T28C12[7]        | 6342382        | 8            |               |
| pkP692               | 6350881        | 8499         |               |

|                      |                 |              |               |
|----------------------|-----------------|--------------|---------------|
| snp_F13H6[5]         | 6354308         | 3427         |               |
| snp_F13H6[6]         | 6370939         | 16631        |               |
| uCE5-1445            | 6420042         | 49103        |               |
| uCE5-1453            | 6431615         | 11573        |               |
| uCE5-1456            | 6436906         | 5291         |               |
| uCE5-1457            | 6439374         | 2468         |               |
| uCE5-1460            | 6439818         | 444          |               |
| pkP5008              | 6473164         | 33346        |               |
| uCE5-1461            | 6480265         | 7101         |               |
| <b>snp_K04A8[2]</b>  | <b>6565411</b>  | <b>85146</b> | <b>ZH5-05</b> |
| uCE5-1466            | 6620138         | 54727        |               |
| uCE5-1470            | 6635332         | 15194        |               |
| uCE5-1473            | 6657054         | 21722        |               |
| snp_T10H9[3]         | 6661584         | 4530         |               |
| snp_W02F12[1]        | 6718735         | 57151        |               |
| snp_T25F10[1]        | 6761505         | 42770        |               |
| snp_T25F10[3]        | 6772345         | 10840        |               |
| uCE5-1495            | 6816823         | 44478        |               |
| snp_T19F4[1]         | 6879367         | 62544        |               |
| snp_T19F4[2]         | 6881484         | 2117         |               |
| uCE5-1502            | 6881485         | 1            |               |
| pkP585               | 7010894         | 129409       |               |
| pkP5401              | 7010948         | 54           |               |
| uCE5-1514            | 7038699         | 27751        |               |
| snp_F20A1[5]         | 7043272         | 4573         |               |
| pkP5293              | 7160388         | 117116       |               |
| snp_F09G2[1]         | 7169656         | 9268         |               |
| snp_C13F10[2]        | 7225682         | 56026        |               |
| snp_C13F10[5]        | 7226361         | 679          |               |
| snp_C05C8[2]         | 7240104         | 13743        |               |
| uCE5-1522            | 7263976         | 23872        |               |
| uCE5-1529            | 7286344         | 22368        |               |
| uCE5-1530            | 7286356         | 12           |               |
| pkP5249              | 7340386         | 54030        |               |
| pkP740               | 7365383         | 24997        |               |
| pkP5317              | 7377099         | 11716        |               |
| uCE5-1537            | 7411583         | 34484        |               |
| uCE5-1541            | 7449691         | 38108        |               |
| snp_F25E5[1]         | 7453169         | 3478         |               |
| snp_C54F6[2]         | 7521912         | 68743        |               |
| snp_C50E3[2]         | 7594591         | 72679        |               |
| uCE5-1556            | 7603763         | 9172         |               |
| uCE5-1592            | 7624405         | 20642        |               |
| uCE5-1648            | 7656519         | 32114        |               |
| uCE5-1653            | 7656680         | 161          |               |
| uCE5-1662            | 7661970         | 5290         |               |
| uCE5-1688            | 7684405         | 22435        |               |
| snp_Y97E10C[1]       | 7731041         | 46636        |               |
| uCE5-1694            | 7736324         | 5283         |               |
| <b>snp_ZK742[1]</b>  | <b>7801937</b>  | <b>65613</b> | <b>ZH5-16</b> |
| pkP5132              | 7847176         | 45239        |               |
| uCE5-1713            | 7868675         | 21499        |               |
| uCE5-1718            | 7986563         | 117888       |               |
| snp_Y97E10AL[1]      | 7988656         | 2093         |               |
| snp_C09H5[1]         | 8069166         | 80510        |               |
| pkP5056              | 8104819         | 35653        |               |
| uCE5-1720            | 8236206         | 131387       |               |
| snp_F21F8[1]         | 8269605         | 33399        |               |
| snp_T23B12[2]        | 8483713         | 214108       |               |
| pkP593               | 8670248         | 186535       |               |
| pkP870               | 8670258         | 10           |               |
| pkP5248              | 8740650         | 70392        |               |
| pkP5147              | 8877135         | 136485       |               |
| snp_H14N18[1]        | 8927900         | 50765        |               |
| pkP734               | 8997002         | 69102        |               |
| snp_C25E10[2]        | 9045651         | 48649        |               |
| pkP501               | 9072456         | 26805        |               |
| pkP745               | 9127999         | 55543        |               |
| pkP5010              | 9128103         | 104          |               |
| pkP520               | 9128106         | 3            |               |
| uCE5-1738            | 9199370         | 71264        |               |
| uCE5-1741            | 9249992         | 50622        |               |
| snp_E02C12[3]        | 9352572         | 102580       |               |
| uCE5-1748            | 9372618         | 20046        |               |
| <b>snp_E02C12[8]</b> | <b>9387102</b>  | <b>14484</b> | <b>ZH5-01</b> |
| snp_F36D4[4]         | 9419038         | 31936        |               |
| uCE5-1779            | 9455946         | 36908        |               |
| snp_K06A4[1]         | 9487103         | 31157        |               |
| snp_F25B3[2]         | 9570870         | 83767        |               |
| uCE5-1781            | 9601176         | 30306        |               |
| snp_ZK287[1]         | 9677467         | 76291        |               |
| uCE5-1789            | 9720975         | 43508        |               |
| pkP5168              | 9834822         | 113847       |               |
| pkP5197              | 9892918         | 58096        |               |
| pkP741               | 9893826         | 908          |               |
| pkP714               | 9893834         | 8            |               |
| pkP5309              | 9954706         | 60872        |               |
| uCE5-1798            | 9966416         | 11710        |               |
| <b>snp_K08H10[1]</b> | <b>10008679</b> | <b>42263</b> | <b>ZH5-17</b> |
| snp_R04B5[1]         | 10096507        | 87828        |               |
| pkP710               | 10106195        | 9688         |               |

|                      |                 |               |               |
|----------------------|-----------------|---------------|---------------|
| uCE5-1804            | 10134515        | 28320         |               |
| snp_C51E3[1]         | 10170006        | 35491         |               |
| pkP5145              | 10191846        | 21840         |               |
| pkP660               | 10267623        | 75777         |               |
| uCE5-1814            | 10395768        | 128145        |               |
| snp_F15H10[1]        | 10422285        | 26517         |               |
| pkP5175              | 10496954        | 74669         |               |
| uCE5-1821            | 10572602        | 75648         |               |
| snp_F32D8[1]         | 10877221        | 304619        |               |
| uCE5-1852            | 10997528        | 120307        |               |
| pkP712               | 11087202        | 89674         |               |
| pkP5130              | 11087205        | 3             |               |
| snp_C06H2[3]         | 11137526        | 50321         |               |
| snp_C06H2[4]         | 11142531        | 5005          |               |
| uCE5-1864            | 11276550        | 134019        |               |
| uCE5-1865            | 11276550        | 0             |               |
| uCE5-1866            | 11276550        | 0             |               |
| uCE5-1867            | 11276550        | 0             |               |
| <b>snp_C03E10[1]</b> | <b>11284131</b> | <b>7581</b>   | <b>ZH5-18</b> |
| pkP523               | 11292879        | 8748          |               |
| pkP575               | 11383772        | 90893         |               |
| uCE5-1873            | 11408889        | 25117         |               |
| uCE5-1877            | 11438797        | 29908         |               |
| snp_T11F9[2]         | 11494313        | 55516         |               |
| pkP534               | 11497012        | 2699          |               |
| pkP554               | 11541894        | 44882         |               |
| snp_F46F3[2]         | 11685199        | 143305        |               |
| snp_D2023[5]         | 11808836        | 123637        |               |
| <b>snp_D2023[10]</b> | <b>11830176</b> | <b>21340</b>  | <b>ZH5-06</b> |
| uCE5-1903            | 11919023        | 88847         |               |
| snp_F58H1[3]         | 11948344        | 29321         |               |
| uCE5-1906            | 11990890        | 42546         |               |
| uCE5-1909            | 12018370        | 27480         |               |
| pkP5128              | 12105561        | 87191         |               |
| pkP640               | 12105561        | 0             |               |
| pkP5181              | 12284852        | 179291        |               |
| pkP587               | 12310321        | 25469         |               |
| snp_R04F11[1]        | 12316739        | 6418          |               |
| snp_R04F11[4]        | 12333339        | 16600         |               |
| snp_F23H12[2]        | 12349532        | 16193         |               |
| pkP5069              | 12378457        | 28925         |               |
| uCE5-1974            | 12463739        | 85282         |               |
| uCE5-2428            | 12494424        | 30685         |               |
| uCE5-2429            | 12494431        | 7             |               |
| snp_T28H10[1]        | 12509909        | 15478         |               |
| uCE5-1977            | 12537417        | 27508         |               |
| snp_F45D3[7]         | 12556903        | 19486         |               |
| snp_E02A10[1]        | 12585452        | 28549         |               |
| snp_E02A10[3]        | 12588744        | 3292          |               |
| uCE5-1986            | 12642740        | 53996         |               |
| snp_W05B10[1]        | 12678956        | 36216         |               |
| snp_W05B10[3]        | 12680840        | 1884          |               |
| uCE5-1988            | 12714754        | 33914         |               |
| uCE5-1991            | 12748427        | 33673         |               |
| uCE5-1999            | 12818311        | 69884         |               |
| uCE5-2001            | 12957628        | 139317        |               |
| uCE5-2004            | 13007413        | 49785         |               |
| snp_F42E8[2]         | 13069662        | 62249         |               |
| uCE5-2005            | 13073288        | 3626          |               |
| uCE5-2006            | 13073453        | 165           |               |
| snp_B0365[1]         | 13133316        | 59863         |               |
| snp_K03H4[1]         | 13164123        | 30807         |               |
| uCE5-2016            | 13208583        | 44460         |               |
| <b>snp_C50B6[6]</b>  | <b>13342985</b> | <b>134402</b> | <b>ZH5-11</b> |
| snp_C50B6[8]         | 13342990        | 5             |               |
| uCE5-2025            | 13417124        | 74134         |               |
| snp_C56A3[1]         | 13535151        | 118027        |               |
| pkP667               | 13535845        | 694           |               |
| uCE5-2032            | 13663650        | 127805        |               |
| snp_F35E12[6]        | 13750745        | 87095         |               |
| snp_F55B12[3]        | 13834089        | 83344         |               |
| uCE5-2043            | 13918546        | 84457         |               |
| pkP655               | 13927722        | 9176          |               |
| pkP5156              | 13927724        | 2             |               |
| pkP716               | 13927746        | 22            |               |
| pkP945               | 13939296        | 11550         |               |
| uCE5-2057            | 13978777        | 39481         |               |
| snp_T26F2[2]         | 13981104        | 2327          |               |
| snp_F58E10[2]        | 13991647        | 10543         |               |
| pkP623               | 14025725        | 34078         |               |
| pkP5068              | 14025728        | 3             |               |
| snp_D1086[3]         | 14090740        | 65012         |               |
| snp_AH10[4]          | 14152932        | 62192         |               |
| <b>snp_T16A9[2]</b>  | <b>14220019</b> | <b>67087</b>  | <b>ZH5-23</b> |
| uCE5-2078            | 14352343        | 132324        |               |
| snp_F23B12[1]        | 14448361        | 96018         |               |
| snp_F43D2[1]         | 14628078        | 179717        |               |
| snp_F43D2[2]         | 14628080        | 2             |               |
| snp_F43D2[3]         | 14628292        | 212           |               |
| snp_C54G10[2]        | 14654108        | 25816         |               |
| pkP5114              | 14758017        | 103909        |               |

|                     |                 |              |               |
|---------------------|-----------------|--------------|---------------|
| snp_C48G7[2]        | 14806785        | 48768        |               |
| snp_H12D21[3]       | 14910964        | 104179       |               |
| pkP717              | 14929322        | 18358        |               |
| pkP695              | 14929353        | 31           |               |
| pkP725              | 14929444        | 91           |               |
| pkP5124             | 14929445        | 1            |               |
| snp_C30G7[1]        | 14942686        | 13241        |               |
| snp_C30G7[3]        | 14953111        | 10425        |               |
| snp_F02D8[1]        | 14986682        | 33571        |               |
| pkP665              | 15089817        | 103135       |               |
| pkP626              | 15130019        | 40202        |               |
| uCE5-2134           | 15331678        | 201659       |               |
| pkP574              | 15338639        | 6961         |               |
| uCE5-2135           | 15351523        | 12884        |               |
| snp_R08H2[1]        | 15376669        | 25146        |               |
| pkP693              | 15414245        | 37576        |               |
| pkP5186             | 15415400        | 1155         |               |
| pkP978              | 15416909        | 1509         |               |
| <b>snp_Y36E3[4]</b> | <b>15430591</b> | <b>13682</b> | <b>ZH5-12</b> |
| uCE5-2140           | 15446976        | 16385        |               |
| uCE5-2148           | 15576766        | 129790       |               |
| snp_B0391[1]        | 15615224        | 38458        |               |
| snp_B0391[3]        | 15615941        | 717          |               |
| snp_B0391[5]        | 15615944        | 3            |               |
| snp_C55A1[1]        | 15630697        | 14753        |               |
| uCE5-2160           | 15656602        | 25905        |               |
| snp_K06B4[1]        | 15677064        | 20462        |               |
| snp_K06B4[4]        | 15677234        | 170          |               |
| uCE5-2203           | 15792108        | 114874       |               |
| uCE5-2247           | 15966690        | 174582       |               |
| uCE5-2271           | 15976310        | 9620         |               |
| uCE5-2277           | 15978060        | 1750         |               |
| uCE5-2281           | 15978127        | 67           |               |
| pkP842              | 16074809        | 96682        |               |
| pkP802              | 16074812        | 3            |               |
| pkP793              | 16074814        | 2            |               |
| uCE5-2302           | 16076882        | 2068         |               |
| <b>snp_F22B8[2]</b> | <b>16101559</b> | <b>24677</b> | <b>ZH5-20</b> |
| snp_F44G3[3]        | 16123288        | 21729        |               |
| snp_F44G3[6]        | 16123559        | 271          |               |
| uCE5-2309           | 16130658        | 7099         |               |
| uCE5-2328           | 16254671        | 124013       |               |
| snp_T13F3[1]        | 16267497        | 12826        |               |
| snp_T13F3[2]        | 16267500        | 3            |               |
| pkP5043             | 16276096        | 8596         |               |
| uCE5-2356           | 16351993        | 75897        |               |
| uCE5-2357           | 16352058        | 65           |               |
| uCE5-2363           | 16382411        | 30353        |               |
| uCE5-2364           | 16388002        | 5591         |               |
| uCE5-2370           | 16410248        | 22246        |               |
| uCE5-2373           | 16410424        | 176          |               |
| snp_T08G3[1]        | 16446288        | 35864        |               |
| uCE5-2388           | 16452798        | 6510         |               |
| uCE5-2391           | 16452800        | 2            |               |
| uCE5-2392           | 16452843        | 43           |               |
| uCE5-2386           | 16452858        | 15           |               |
| uCE5-2389           | 16452858        | 0            |               |
| uCE5-2387           | 16452864        | 6            |               |
| uCE5-2390           | 16452864        | 0            |               |
| uCE5-2394           | 16453140        | 276          |               |
| uCE5-2399           | 16462744        | 9604         |               |
| pkP787              | 16516882        | 54138        |               |
| pkP578              | 16516897        | 15           |               |
| snp_T03E6[3]        | 16580776        | 63879        |               |
| uCE5-2418           | 16598003        | 17227        |               |
| snp_F14D1[1]        | 16762502        | 164499       |               |
| snp_F14D1[2]        | 16762836        | 334          |               |
| pkP5327             | 16777749        | 14913        |               |
| uCE5-2455           | 16779768        | 2019         |               |
| uCE5-2456           | 16780696        | 928          |               |
| snp_Y102A5[1]       | 16803990        | 23294        |               |
| <b>snp_T20B3[1]</b> | <b>16847598</b> | <b>43608</b> | <b>ZH5-08</b> |
| uCE5-2506           | 17084394        | 236796       |               |
| uCE5-2517           | 17107582        | 23188        |               |
| uCE5-2518           | 17107637        | 55           |               |
| uCE5-2532           | 17131527        | 23890        |               |
| snp_F40D4[4]        | 17168246        | 36719        |               |
| snp_F40D4[6]        | 17177795        | 9549         |               |
| snp_Y20C6[3]        | 17377777        | 199982       |               |
| uCE5-2557           | 17511542        | 133765       |               |
| snp_C38D9[4]        | 17589353        | 77811        |               |
| uCE5-2570           | 17604175        | 14822        |               |
| uCE5-2581           | 17608470        | 4295         |               |
| uCE5-2611           | 17610603        | 2133         |               |
| uCE5-2613           | 17612354        | 1751         |               |
| uCE5-2624           | 17660103        | 47749        |               |
| snp_F59A1[6]        | 17679825        | 19722        |               |
| snp_Y26G10[1]       | 17703409        | 23584        |               |
| uCE5-2716           | 17786372        | 82963        |               |
| snp_C47A10[2]       | 17795399        | 9027         |               |
| snp_Y59A8[1]        | 17844934        | 49535        |               |

|                      |                 |              |               |
|----------------------|-----------------|--------------|---------------|
| pkP771               | 17917836        | 72902        |               |
| uCE5-2738            | 17936240        | 18404        |               |
| snp_Y59A8B[1]        | 17937893        | 1653         |               |
| uCE5-2740            | 17965548        | 27655        |               |
| uCE5-2741            | 17965568        | 20           |               |
| uCE5-2743            | 17991769        | 26201        |               |
| uCE5-2759            | 18012203        | 20434        |               |
| pkP622               | 18018499        | 6296         |               |
| pkP5057              | 18018501        | 2            |               |
| snp_Y59A8B[8]        | 18036305        | 17804        |               |
| uCE5-2763            | 18048139        | 11834        |               |
| snp_Y37H2[2]         | 18114425        | 66286        |               |
| <b>snp_C14A6[1]</b>  | <b>18147681</b> | <b>33256</b> | <b>ZH5-21</b> |
| snp_C14A6[3]         | 18147694        | 13           |               |
| snp_C14A6[4]         | 18147702        | 8            |               |
| pkP5166              | 18186531        | 38829        |               |
| pkP5140              | 18186538        | 7            |               |
| snp_R10E8[2]         | 18260925        | 74387        |               |
| uCE5-2791            | 18262897        | 1972         |               |
| uCE5-2805            | 18358390        | 95493        |               |
| snp_C08E8[15]        | 18370766        | 12376        |               |
| snp_Y51A2B[2]        | 18394937        | 24171        |               |
| pkP5048              | 18446528        | 51591        |               |
| snp_Y51A2D[3]        | 18495698        | 49170        |               |
| uCE5-2839            | 18502665        | 6967         |               |
| uCE5-2842            | 18510340        | 7675         |               |
| snp_Y51A2D[9]        | 18517399        | 7059         |               |
| snp_Y51A2D[11]       | 18517605        | 206          |               |
| pkP5227              | 18517648        | 43           |               |
| snp_Y51A2D[14]       | 18586589        | 68941        |               |
| snp_Y51A2D[15]       | 18586617        | 28           |               |
| snp_Y51A2D[18]       | 18600448        | 13831        |               |
| snp_Y51A2D[20]       | 18600652        | 204          |               |
| uCE5-2848            | 18640526        | 39874        |               |
| pkP586               | 18711374        | 70848        |               |
| pkP5271              | 18711378        | 4            |               |
| snp_Y17D7C[1]        | 18728047        | 16669        |               |
| snp_Y17D7C[2]        | 18728083        | 36           |               |
| uCE5-2860            | 18770746        | 42663        |               |
| snp_F11D11[9]        | 18770755        | 9            |               |
| snp_Y17D7B[5]        | 18788986        | 18231        |               |
| snp_C54E10[3]        | 18818755        | 29769        |               |
| snp_Y80D3[9]         | 18939716        | 120961       |               |
| uCE5-2884            | 18940715        | 999          |               |
| snp_Y39B6[5]         | 18996702        | 55987        |               |
| snp_Y39B6[6]         | 18996877        | 175          |               |
| snp_Y39B6[7]         | 19002448        | 5571         |               |
| snp_Y39B6[10]        | 19003879        | 1431         |               |
| uCE5-2888            | 19130057        | 126178       |               |
| <b>snp_Y39B6[17]</b> | <b>19147608</b> | <b>17551</b> | <b>ZH5-09</b> |
| snp_Y39B6[19]        | 19186825        | 39217        |               |
| snp_Y39B6[8]         | 19202968        | 16143        |               |
| uCE5-2905            | 19250571        | 47603        |               |
| pkP527               | 19256763        | 6192         |               |
| uCE5-2914            | 19290269        | 33506        |               |
| uCE5-2986            | 19380884        | 90615        |               |
| uCE5-3006            | 19516859        | 135975       |               |
| uCE5-3024            | 19536057        | 19198        |               |
| snp_Y43F8B[3]        | 19537522        | 1465         |               |
| snp_Y43F8B[4]        | 19541515        | 3993         |               |
| snp_B0399[8]         | 19586726        | 45211        |               |
| uCE5-3036            | 19611710        | 24984        |               |
| snp_Y43F8C[8]        | 19636935        | 25225        |               |
| snp_Y43F8C[9]        | 19637014        | 79           |               |
| snp_Y43F8C[11]       | 19645976        | 8962         |               |
| snp_Y116F11[5]       | 19724404        | 78428        |               |
| uCE5-3052            | 19748957        | 24553        |               |
| uCE5-3057            | 19751392        | 2435         |               |
| uCE5-3058            | 19751396        | 4            |               |
| uCE5-3059            | 19751397        | 1            |               |
| uCE5-3060            | 19751416        | 19           |               |
| uCE5-3061            | 19751421        | 5            |               |
| uCE5-3062            | 19751428        | 7            |               |
| uCE5-3063            | 19751438        | 10           |               |
| uCE5-3066            | 19751465        | 27           |               |
| uCE5-3067            | 19751472        | 7            |               |
| uCE5-3073            | 19751474        | 2            |               |
| uCE5-3076            | 19751475        | 1            |               |
| uCE5-3082            | 19751475        | 0            |               |
| uCE5-3077            | 19751479        | 4            |               |
| uCE5-3080            | 19751482        | 3            |               |
| uCE5-3068            | 19751488        | 6            |               |
| uCE5-3069            | 19751489        | 1            |               |
| uCE5-3074            | 19751490        | 1            |               |
| uCE5-3078            | 19751490        | 0            |               |
| uCE5-3081            | 19751490        | 0            |               |
| uCE5-3075            | 19751491        | 1            |               |
| uCE5-3079            | 19751491        | 0            |               |
| uCE5-3088            | 19786674        | 35183        |               |
| uCE5-3092            | 19820134        | 33460        |               |
| pkP858               | 19964309        | 144175       |               |

|                      |                 |             |               |
|----------------------|-----------------|-------------|---------------|
| pkP819               | 19964310        | 1           |               |
| pkP556               | 19964314        | 4           |               |
| snp_Y60A3[1]         | 20020826        | 56512       |               |
| snp_Y60A3[2]         | 20023186        | 2360        |               |
| pkP648               | 20040000        | 16814       |               |
| snp_Y113G7[2]        | 20045469        | 5469        |               |
| snp_Y113G7[4]        | 20045585        | 116         |               |
| <b>snp_Y113G7[6]</b> | <b>20050070</b> | <b>4485</b> | <b>ZH5-22</b> |
| snp_Y113G7[8]        | 20050074        | 4           |               |
| uCE5-3104            | 20060012        | 9938        |               |
| snp_Y113G7[21]       | 20109570        | 49558       |               |
| pkP5046              | 20151835        | 42265       |               |
| snp_ZC15[1]          | 20274858        | 123023      |               |
| uCE5-3178            | 20416286        | 141428      |               |
| uCE5-3181            | 20437794        | 21508       |               |
| uCE5-3184            | 20437980        | 186         |               |
| uCE5-3185            | 20437986        | 6           |               |
| snp_F48F5[6]         | 20445932        | 7946        |               |
| pkP5105              | 20461946        | 16014       |               |
| snp_B0250[2]         | 20465938        | 3992        |               |
| snp_B0250[4]         | 20466304        | 366         |               |
| uCE5-3212            | 20504110        | 37806       |               |
| uCE5-3221            | 20504545        | 435         |               |
| uCE5-3251            | 20524051        | 19506       |               |
| snp_Y38H6C[6]        | 20534624        | 10573       |               |
| pkP969               | 20548576        | 13952       |               |
| pkP5074              | 20548579        | 3           |               |
| uCE5-3352            | 20603039        | 54460       |               |
| uCE5-3388            | 20616740        | 13701       |               |
| uCE5-3394            | 20652628        | 35888       |               |
| uCE5-3396            | 20652967        | 339         |               |
| pkP5064              | 20654877        | 1910        |               |
| pkP591               | 20654881        | 4           |               |
| pkP942               | 20663914        | 9033        |               |
| pkP940               | 20663916        | 2           |               |
| snp_W01F3[5]         | 20678611        | 14695       |               |
| uCE5-3409            | 20763192        | 84581       |               |
| pkP5292              | 20787623        | 24431       |               |
| snp_Y44A6D[1]        | 20790963        | 3340        |               |
| snp_Y44A6D[5]        | 20804012        | 13049       |               |
| snp_F31D4[1]         | 20858860        | 54848       |               |
| uCE5-3418            | 20867753        | 8893        |               |
| snp_Y44A6E[2]        | 20917647        | 49894       |               |
