# Supplementary material for: A universal method for automated gene mapping
Source: PubMed Central journal article supplement (PMC551539; doi:10.1186/gb-2005-6-2-r19), 2005-01-17
Supplement: gb-2005-6-2-r19-s17.pdf [file gb-2005-6-2-r19-s17.pdf]

**Supplementary Table 9:  
Predicted *C. elegans* InDels LGX**

(Validated FLP assays are shown in blue)

| WormBase SNP         | Position on Chromosome (nt) | Distance between InDels (nt) | Assay Name    |
|----------------------|-----------------------------|------------------------------|---------------|
| uCE6-521             | 52951                       | -                            |               |
| uCE6-518             | 109323                      | 56372                        |               |
| snp_Y73B3[1]         | 147486                      | 38163                        |               |
| snp_Y73B3B[2]        | 206660                      | 59174                        |               |
| snp_AC8[1]           | 225149                      | 18489                        |               |
| pkP5196              | 228408                      | 3259                         |               |
| pkP519               | 228413                      | 5                            |               |
| uCE6-530             | 290009                      | 61596                        |               |
| uCE6-522             | 290011                      | 2                            |               |
| uCE6-525             | 290041                      | 30                           |               |
| uCE6-526             | 290049                      | 8                            |               |
| uCE6-527             | 290059                      | 10                           |               |
| uCE6-528             | 290062                      | 3                            |               |
| uCE6-529             | 290088                      | 26                           |               |
| uCE6-523             | 290196                      | 108                          |               |
| uCE6-538             | 406296                      | 116100                       |               |
| uCE6-539             | 423438                      | 17142                        |               |
| uCE6-542             | 518390                      | 94952                        |               |
| uCE6-546             | 639067                      | 120677                       |               |
| <b>snp_C02H7[1]</b>  | <b>734252</b>               | <b>95185</b>                 | <b>ZHX-16</b> |
| pkP5165              | 737138                      | 2886                         |               |
| uCE6-554             | 772881                      | 35743                        |               |
| uCE6-558             | 855896                      | 83015                        |               |
| uCE6-565             | 1001242                     | 145346                       |               |
| uCE6-568             | 1057956                     | 56714                        |               |
| <b>snp_C46H3[1]</b>  | <b>1210652</b>              | <b>152696</b>                | <b>ZHX-17</b> |
| snp_C46H3[3]         | 1215467                     | 4815                         |               |
| uCE6-582             | 1270501                     | 55034                        |               |
| snp_C52B11[8]        | 1299981                     | 29480                        |               |
| uCE6-589             | 1395559                     | 95578                        |               |
| snp_F19G12[1]        | 1426106                     | 30547                        |               |
| uCE6-595             | 1447593                     | 21487                        |               |
| snp_F09E10[5]        | 1497222                     | 49629                        |               |
| uCE6-599             | 1500879                     | 3657                         |               |
| uCE6-638             | 1553838                     | 52959                        |               |
| uCE6-639             | 1553889                     | 51                           |               |
| uCE6-644             | 1659826                     | 105937                       |               |
| uCE6-687             | 1663737                     | 3911                         |               |
| uCE6-706             | 1850761                     | 187024                       |               |
| snp_T26C11[1]        | 1861200                     | 10439                        |               |
| snp_Y40A1[1]         | 1989912                     | 128712                       |               |
| <b>snp_F49H12[2]</b> | <b>2090657</b>              | <b>100745</b>                | <b>ZHX-03</b> |
| pkP670               | 2153697                     | 63040                        |               |
| uCE6-726             | 2215587                     | 61890                        |               |
| uCE6-729             | 2262902                     | 47315                        |               |
| snp_T24D8[7]         | 2355718                     | 92816                        |               |
| snp_T24D8[10]        | 2355958                     | 240                          |               |
| snp_F47G3[2]         | 2386372                     | 30414                        |               |
| uCE6-751             | 2391708                     | 5336                         |               |
| uCE6-760             | 2489084                     | 97376                        |               |
| snp_F52H2[1]         | 2548791                     | 59707                        |               |
| snp_T03G6[2]         | 2597063                     | 48272                        |               |
| pkP5308              | 2674707                     | 77644                        |               |
| snp_C09B7[2]         | 2677804                     | 3097                         |               |
| snp_T02C5[1]         | 2702342                     | 24538                        |               |
| snp_T02C5[2]         | 2708004                     | 5662                         |               |
| snp_T02C5[4]         | 2710066                     | 2062                         |               |
| snp_Y76F7[1]         | 2726891                     | 16825                        |               |
| snp_Y76F7[2]         | 2727139                     | 248                          |               |
| snp_F55F1[1]         | 2768649                     | 41510                        |               |
| snp_F55F1[5]         | 2773407                     | 4758                         |               |
| snp_C14A11[1]        | 2790266                     | 16859                        |               |
| snp_Y71H10B[2]       | 2841154                     | 50888                        |               |
| uCE6-779             | 2853880                     | 12726                        |               |
| uCE6-785             | 2926754                     | 72874                        |               |
| snp_Y41G9[1]         | 2951841                     | 25087                        |               |
| snp_Y41G9[2]         | 2957315                     | 5474                         |               |
| snp_Y41G9[3]         | 2962203                     | 4888                         |               |
| snp_Y41G9[4]         | 2970778                     | 8575                         |               |
| snp_Y41G9[5]         | 2971156                     | 378                          |               |
| pkP5143              | 3014898                     | 43742                        |               |
| pkP5020              | 3038425                     | 23527                        |               |
| uCE6-791             | 3041157                     | 2732                         |               |
| snp_C15C7[1]         | 3156486                     | 115329                       |               |

|                     |                |               |               |
|---------------------|----------------|---------------|---------------|
| <b>snp_C15C7[3]</b> | 3157420        | 934           | <b>ZHX-08</b> |
| snp_F28B4[2]        | 3219035        | 61615         |               |
| snp_F28B4[5]        | 3226627        | 7592          |               |
| snp_F11D5[3]        | 3323169        | 96542         |               |
| snp_ZK563[2]        | 3367877        | 44708         |               |
| snp_ZK563[4]        | 3376415        | 8538          |               |
| snp_ZK377[1]        | 3469424        | 93009         |               |
| snp_R11G1[1]        | 3635422        | 165998        |               |
| snp_R11G1[2]        | 3648848        | 13426         |               |
| snp_C01C4[1]        | 3697221        | 48373         |               |
| pkP744              | 3704905        | 7684          |               |
| uCE6-842            | 3936239        | 231334        |               |
| uCE6-843            | 3947206        | 10967         |               |
| uCE6-847            | 3994152        | 46946         |               |
| uCE6-849            | 3994292        | 140           |               |
| uCE6-850            | 3994301        | 9             |               |
| uCE6-853            | 4118478        | 124177        |               |
| snp_F09F9[1]        | 4129297        | 10819         |               |
| snp_C52B9[4]        | 4258507        | 129210        |               |
| uCE6-855            | 4308901        | 50394         |               |
| <b>snp_R160[2]</b>  | <b>4377207</b> | <b>68306</b>  | <b>ZHX-13</b> |
| snp_R160[3]         | 4377318        | 111           |               |
| snp_R160[5]         | 4401727        | 24409         |               |
| snp_R160[6]         | 4401747        | 20            |               |
| pkP733              | 4420207        | 18460         |               |
| pkP5256             | 4423336        | 3129          |               |
| pkP965              | 4433624        | 10288         |               |
| pkP5229             | 4433640        | 16            |               |
| uCE6-866            | 4507557        | 73917         |               |
| snp_F46H6[7]        | 4513955        | 6398          |               |
| uCE6-869            | 4561518        | 47563         |               |
| snp_F55D10[3]       | 4719079        | 157561        |               |
| pkP538              | 4779731        | 60652         |               |
| <b>pkP6106</b>      | <b>4892210</b> | <b>112479</b> | <b>ZHX-15</b> |
| pkP526              | 4958360        | 66150         |               |
| pkP754              | 5083101        | 124741        |               |
| snp_C31H2[4]        | 5127411        | 44310         |               |
| snp_T03G11[3]       | 5179664        | 52253         |               |
| uCE6-903            | 5234576        | 54912         |               |
| uCE6-927            | 5390191        | 155615        |               |
| snp_C25F6[2]        | 5466279        | 76088         |               |
| pkP743              | 5489327        | 23048         |               |
| snp_T23F2[3]        | 5493904        | 4577          |               |
| uCE6-931            | 5508057        | 14153         |               |
| uCE6-933            | 5517030        | 8973          |               |
| snp_C38C5[1]        | 5562465        | 45435         |               |
| snp_C38C5[3]        | 5562888        | 423           |               |
| snp_F14D12[1]       | 5614980        | 52092         |               |
| snp_W01C8[1]        | 5675135        | 60155         |               |
| uCE6-947            | 5718174        | 43039         |               |
| snp_C41G11[2]       | 5729842        | 11668         |               |
| snp_C54H2[4]        | 5770133        | 40291         |               |
| snp_F46G11[2]       | 5798689        | 28556         |               |
| snp_F46G11[3]       | 5798706        | 17            |               |
| snp_F13D11[4]       | 5818213        | 19507         |               |
| uCE6-959            | 5819246        | 1033          |               |
| uCE6-966            | 5877817        | 58571         |               |
| pkP748              | 5896619        | 18802         |               |
| pkP5006             | 5896637        | 18            |               |
| pkP511              | 5896640        | 3             |               |
| snp_Y23B4[3]        | 5925075        | 28435         |               |
| snp_F22F4[1]        | 5982704        | 57629         |               |
| pkP943              | 6025313        | 42609         |               |
| uCE6-986            | 6047651        | 22338         |               |
| snp_C14F11[1]       | 6244196        | 196545        |               |
| uCE6-989            | 6296346        | 52150         |               |
| snp_K10C2[2]        | 6427081        | 130735        |               |
| <b>snp_K04E7[1]</b> | <b>6455366</b> | <b>28285</b>  | <b>ZHX-10</b> |
| pkP5141             | 6462915        | 7549          |               |
| snp_T14E8[1]        | 6543476        | 80561         |               |
| pkP5058             | 6618074        | 74598         |               |
| snp_C56E10[2]       | 6654207        | 36133         |               |
| uCE6-999            | 6693564        | 39357         |               |
| snp_C53B7[2]        | 6863507        | 169943        |               |
| snp_F14B8[1]        | 6921666        | 58159         |               |
| pkP981              | 7017186        | 95520         |               |
| pkP5266             | 7018796        | 1610          |               |
| snp_C36B7[1]        | 7106845        | 88049         |               |
| snp_C36B7[4]        | 7108680        | 1835          |               |
| snp_C36B7[6]        | 7117968        | 9288          |               |
| snp_C55B6[1]        | 7183063        | 65095         |               |
| snp_F46H5[1]        | 7243181        | 60118         |               |
| snp_K03A1[1]        | 7300263        | 57082         |               |

|                      |                 |              |               |
|----------------------|-----------------|--------------|---------------|
| pkP618               | 7302951         | 2688         |               |
| snp_T08A9[1]         | 7315626         | 12675        |               |
| uCE6-1019            | 7319689         | 4063         |               |
| snp_C07D8[6]         | 7343858         | 24169        |               |
| snp_C10A4[1]         | 7403284         | 59426        |               |
| snp_K08A8[1]         | 7471843         | 68559        |               |
| uCE6-1036            | 7477323         | 5480         |               |
| snp_F46C8[2]         | 7554513         | 77190        |               |
| snp_F08C6[2]         | 7585682         | 31169        |               |
| snp_F26A10[2]        | 7615017         | 29335        |               |
| uCE6-1043            | 7656761         | 41744        |               |
| uCE6-1046            | 7785251         | 128490       |               |
| snp_R03G5[2]         | 7815759         | 30508        |               |
| snp_R03G5[3]         | 7820885         | 5126         |               |
| <b>snp_C54D2[3]</b>  | <b>7832035</b>  | <b>11150</b> | <b>ZHX-02</b> |
| pkP6109              | 7832756         | 721          |               |
| uCE6-1070            | 8002239         | 169483       |               |
| snp_C34D10[1]        | 8010910         | 8671         |               |
| pkP5014              | 8038033         | 27123        |               |
| pkP532               | 8038036         | 3            |               |
| uCE6-1077            | 8085855         | 47819        |               |
| pkP5244              | 8195727         | 109872       |               |
| pkP5023              | 8195728         | 1            |               |
| pkP5205              | 8195868         | 140          |               |
| snp_C47D2[1]         | 8202329         | 6461         |               |
| snp_C47D2[2]         | 8202592         | 263          |               |
| pkP5116              | 8212027         | 9435         |               |
| pkP5285              | 8318770         | 106743       |               |
| uCE6-1084            | 8381208         | 62438        |               |
| snp_F41D9[2]         | 8388918         | 7710         |               |
| <b>snp_F41D9[4]</b>  | <b>8391581</b>  | <b>2663</b>  | <b>ZHX-24</b> |
| snp_T01B10[1]        | 8487006         | 95425        |               |
| snp_C03G5[1]         | 8533743         | 46737        |               |
| uCE6-1090            | 8606668         | 72925        |               |
| pkP960               | 8612805         | 6137         |               |
| pkP5037              | 8656467         | 43662        |               |
| snp_C28G1[1]         | 8844302         | 187835       |               |
| snp_T25B6[1]         | 9016277         | 171975       |               |
| pkP588               | 9057191         | 40914        |               |
| snp_C25A11[1]        | 9102704         | 45513        |               |
| uCE6-1110            | 9143677         | 40973        |               |
| snp_Y81B9[2]         | 9191677         | 48000        |               |
| snp_Y81B9[3]         | 9191814         | 137          |               |
| pkP704               | 9247148         | 55334        |               |
| snp_C23F12[1]        | 9410842         | 163694       |               |
| pkP709               | 9620043         | 209201       |               |
| snp_F15G9[2]         | 9725707         | 105664       |               |
| snp_F47A4[1]         | 9839716         | 114009       |               |
| pkP643               | 9861856         | 22140        |               |
| pkP5126              | 9955059         | 93203        |               |
| <b>pkP6138</b>       | <b>10010095</b> | <b>55036</b> | <b>ZHX-07</b> |
| pkP976               | 10063916        | 53821        |               |
| snp_ZC373[3]         | 10078805        | 14889        |               |
| uCE6-1146            | 10195759        | 116954       |               |
| snp_C32A9[1]         | 10252595        | 56836        |               |
| snp_F41E7[7]         | 10296881        | 44286        |               |
| uCE6-1155            | 10316960        | 20079        |               |
| snp_R07E3[2]         | 10321628        | 4668         |               |
| snp_R07E3[4]         | 10321780        | 152          |               |
| uCE6-1159            | 10376728        | 54948        |               |
| snp_F46F6[3]         | 10381676        | 4948         |               |
| snp_F46F6[4]         | 10381747        | 71           |               |
| snp_F46F6[5]         | 10381760        | 13           |               |
| snp_F46F6[6]         | 10381902        | 142          |               |
| pkP503               | 10423230        | 41328        |               |
| pkP5127              | 10423230        | 0            |               |
| pkP720               | 10549450        | 126220       |               |
| uCE6-1179            | 10550866        | 1416         |               |
| snp_F59F5[2]         | 10557741        | 6875         |               |
| uCE6-1183            | 10662416        | 104675       |               |
| snp_T01C1[1]         | 10714489        | 52073        |               |
| snp_T01C1[7]         | 10731601        | 17112        |               |
| uCE6-1191            | 10761820        | 30219        |               |
| snp_T21B6[3]         | 10944495        | 182675       |               |
| snp_W04G3[2]         | 11076852        | 132357       |               |
| snp_F42E11[1]        | 11366985        | 290133       |               |
| snp_T25C12[1]        | 11461829        | 94844        |               |
| snp_T25C12[2]        | 11462023        | 194          |               |
| snp_T25C12[3]        | 11462036        | 13           |               |
| <b>snp_T25C12[4]</b> | <b>11464550</b> | <b>2514</b>  | <b>ZHX-12</b> |
| snp_T25C12[8]        | 11491018        | 26468        |               |
| uCE6-1222            | 11492871        | 1853         |               |
| uCE6-1225            | 11564034        | 71163        |               |

|                      |                 |               |                |
|----------------------|-----------------|---------------|----------------|
| snp_T04F8[2]         | 11679277        | 115243        |                |
| uCE6-1229            | 11689186        | 9909          |                |
| uCE6-1231            | 11725660        | 36474         |                |
| uCE6-1232            | 11772907        | 47247         |                |
| uCE6-1236            | 11931639        | 158732        |                |
| uCE6-1242            | 12018335        | 86696         |                |
| uCE6-1251            | 12174612        | 156277        |                |
| pkP535               | 12194191        | 19579         |                |
| <b>snp_F17E5[1]</b>  | <b>12401713</b> | <b>207522</b> | <b>ZHX-11</b>  |
| snp_F17E5[4]         | 12407316        | 5603          |                |
| uCE6-1263            | 12416833        | 9517          |                |
| snp_C16D6[1]         | 12514519        | 97686         |                |
| snp_T24D5[1]         | 12568875        | 54356         |                |
| uCE6-1291            | 12615593        | 46718         |                |
| pkP5028              | 12628490        | 12897         |                |
| uCE6-1293            | 12641281        | 12791         |                |
| uCE6-1295            | 12642764        | 1483          |                |
| uCE6-1299            | 12812591        | 169827        |                |
| pkP5016              | 12815870        | 3279          |                |
| pkP757               | 12815872        | 2             |                |
| uCE6-1307            | 12920089        | 104217        |                |
| snp_C05E7[1]         | 12962243        | 42154         |                |
| pkP514               | 12996610        | 34367         |                |
| snp_R03G8[1]         | 13089113        | 92503         |                |
| uCE6-1323            | 13219586        | 130473        |                |
| snp_K08H2[1]         | 13228266        | 8680          |                |
| pkP980               | 13281083        | 52817         |                |
| pkP649               | 13284155        | 3072          |                |
| snp_R04D3[4]         | 13288884        | 4729          |                |
| <b>snp_R04D3[5]</b>  | <b>13288921</b> | <b>37</b>     | <b>ZHX-05</b>  |
| snp_C49F8[4]         | 13371165        | 82244         |                |
| snp_F02C12[2]        | 13389241        | 18076         |                |
| uCE6-1346            | 13481140        | 91899         |                |
| snp_F54B11[1]        | 13583583        | 102443        |                |
| uCE6-1352            | 13624249        | 40666         |                |
| snp_C40C9[1]         | 13633955        | 9706          |                |
| snp_C40C9[2]         | 13633981        | 26            |                |
| uCE6-1357            | 13656725        | 22744         |                |
| pkP751               | 13665212        | 8487          |                |
| uCE6-1359            | 13733697        | 68485         |                |
| uCE6-1364            | 13794491        | 60794         |                |
| snp_T21H8[3]         | 13899897        | 105406        |                |
| uCE6-1370            | 14116294        | 216397        |                |
| uCE6-1371            | 14204533        | 88239         |                |
| uCE6-1387            | 14252287        | 47754         |                |
| uCE6-1392            | 14296325        | 44038         |                |
| snp_C11H1[3]         | 14324147        | 27822         |                |
| uCE6-1408            | 14375304        | 51157         |                |
| snp_Y60A9[2]         | 14380620        | 5316          |                |
| uCE6-1416            | 14415957        | 35337         |                |
| <b>snp_F23D12[2]</b> | <b>14429469</b> | <b>13512</b>  | <b>ZHX-21a</b> |
| snp_F23D12[3]        | 14429615        | 146           |                |
| uCE6-1423            | 14431013        | 1398          |                |
| uCE6-1426            | 14431054        | 41            |                |
| uCE6-1430            | 14481319        | 50265         |                |
| uCE6-1437            | 14492472        | 11153         |                |
| uCE6-1438            | 14495144        | 2672          |                |
| snp_D1025[1]         | 14519808        | 24664         |                |
| pkP966               | 14532256        | 12448         |                |
| uCE6-1458            | 14545333        | 13077         |                |
| uCE6-1459            | 14547381        | 2048          |                |
| snp_C44H4[1]         | 14591890        | 44509         |                |
| snp_C44H4[6]         | 14598582        | 6692          |                |
| uCE6-1472            | 14602756        | 4174          |                |
| uCE6-1475            | 14670858        | 68102         |                |
| uCE6-1483            | 14693291        | 22433         |                |
| uCE6-1484            | 14705908        | 12617         |                |
| snp_F33C8[2]         | 14729282        | 23374         |                |
| pkP620               | 14761843        | 32561         |                |
| pkP5154              | 14854750        | 92907         |                |
| uCE6-1502            | 14878726        | 23976         |                |
| snp_F31F6[4]         | 14888320        | 9594          |                |
| uCE6-1513            | 15023336        | 135016        |                |
| uCE6-1515            | 15069299        | 45963         |                |
| snp_F09B12[5]        | 15092585        | 23286         |                |
| uCE6-1517            | 15121470        | 28885         |                |
| uCE6-1521            | 15139437        | 17967         |                |
| uCE6-1522            | 15139753        | 316           |                |
| snp_C11G10[7]        | 15153089        | 13336         |                |
| uCE6-1536            | 15222043        | 68954         |                |
| snp_F46F2[5]         | 15276110        | 54067         |                |
| snp_C02D4[2]         | 15284491        | 8381          |                |
| uCE6-1547            | 15312088        | 27597         |                |

|                     |                 |               |               |
|---------------------|-----------------|---------------|---------------|
| snp_Y15E3[2]        | 15316378        | 4290          |               |
| snp_Y15E3[3]        | 15316539        | 161           |               |
| snp_Y15E3[5]        | 15337551        | 21012         |               |
| snp_Y15E3[6]        | 15337553        | 2             |               |
| pkP6087             | 15357229        | 19676         |               |
| pkP914              | 15380699        | 23470         |               |
| snp_F47C8[1]        | 15385072        | 4373          |               |
| pkP5149             | 15390807        | 5735          |               |
| snp_F39D8[1]        | 15417248        | 26441         |               |
| uCE6-1551           | 15449663        | 32415         |               |
| <b>snp_C02C6[1]</b> | <b>15560852</b> | <b>111189</b> | <b>ZHX-06</b> |
| snp_C02C6[4]        | 15560864        | 12            |               |
| snp_C02C6[8]        | 15562668        | 1804          |               |
| snp_K09A9[2]        | 15590921        | 28253         |               |
| snp_K09E9[4]        | 15625902        | 34981         |               |
| snp_K09E9[5]        | 15629726        | 3824          |               |
| uCE6-1578           | 15633341        | 3615          |               |
| uCE6-1596           | 15897102        | 263761        |               |
| uCE6-1603           | 15963827        | 66725         |               |
| pkP573              | 16057991        | 94164         |               |
| snp_T27A8[1]        | 16060614        | 2623          |               |
| snp_T27A8[2]        | 16069162        | 8548          |               |
| uCE6-1610           | 16186374        | 117212        |               |
| uCE6-1618           | 16369261        | 182887        |               |
| snp_T24D11[2]       | 16408827        | 39566         |               |
| uCE6-1619           | 16416821        | 7994          |               |
| <b>snp_F38E9[2]</b> | <b>16436347</b> | <b>19526</b>  | <b>ZHX-22</b> |
| snp_F59C12[1]       | 16602330        | 165983        |               |
| snp_C06G1[3]        | 16643059        | 40729         |               |
| uCE6-1630           | 16644814        | 1755          |               |
| snp_C06G1[4]        | 16646530        | 1716          |               |
| pkP521              | 16720217        | 73687         |               |
| <b>snp_K02H8[1]</b> | <b>16991892</b> | <b>271675</b> | <b>ZHX-23</b> |
| pkP5302             | 17051438        | 59546         |               |
| uCE6-1643           | 17228976        | 177538        |               |
| pkP651              | 17301912        | 72936         |               |
| snp_C53C11[3]       | 17315136        | 13224         |               |
| pkP5192             | 17386816        | 71680         |               |
| snp_R106[1]         | 17486068        | 99252         |               |
| uCE6-1653           | 17523703        | 37635         |               |
| pkP5022             | 17673951        | 150248        |               |
| pkP934              | 17673954        | 3             |               |
| pkP5071             | 17694254        | 20300         |               |
| pkP933              | 17694256        | 2             |               |
