# Supplementary material for: A universal method for automated gene mapping
Source: PubMed Central journal article supplement (PMC551539; doi:10.1186/gb-2005-6-2-r19), 2005-01-17
Supplement: gb-2005-6-2-r19-s18.pdf [file gb-2005-6-2-r19-s18.pdf]

**Supplementary Table 10:**  
Additional *Drosophila* InDels and their physical position in the reference genome

(Validated FLP assays are shown in red)

| Assay    | Physical Position      | Size Difference EP versus FRT | Remarks                         |
|----------|------------------------|-------------------------------|---------------------------------|
| 2L008    | 2L:610032              | 1 bp                          |                                 |
| 2L017    | 2L:1676015             | 2 bp                          |                                 |
| 2L018    | 2L:1874668             | 1 bp                          |                                 |
| 2L027    | 2L:2855742..2855743    | 2 bp                          |                                 |
| 2L029.1  | 2L:3085920             | 1 bp                          |                                 |
| 2L029.5  | 2L:3086274             | 1 bp                          |                                 |
| 2L030    | 2R:3384440..3384459    | 20 bp                         |                                 |
| 2L033    | 2L:3827409..3827410    | 2 bp                          |                                 |
| 2L034.6  | 2L:3974902             | 1 bp                          |                                 |
| 2L034.12 | 2L:3974907             | 1 bp                          |                                 |
| 2L035    | 2L:4136161             | 7 bp                          | confirmed "PLP"-Assay available |
| 2L038    | 2L:4368826..4368827    | 2 bp                          |                                 |
| 2L045.3  | 2L:5073745             | 1 bp                          |                                 |
| 2L045.5  | 2L:5073749             | 2 bp                          |                                 |
| 2L045.11 | 2L:5073821             | 2 bp                          |                                 |
| 2L045.18 | 2L:5074119             | 2 bp                          |                                 |
| 2L051    | 2L:5565388..5565394    | 7 bp                          |                                 |
| 2L057    | 2L:5950081             | 19 bp                         |                                 |
| 2L059.1  | 2L:6230674             | 12 bp                         | confirmed "PLP"-Assay available |
| 2L059.2  | 2L:6230686             | 2 bp                          |                                 |
| 2L059.7  | 2L:6231150..6231165    | 16 bp                         | confirmed "PLP"-Assay available |
| 2L059.11 | 2L:6231329             | 1 bp                          |                                 |
| 2L059.12 | 2L:6231338             | 2 bp                          |                                 |
| 2L059.16 | 2L:6231342             | 2 bp                          |                                 |
| 2L060    | 2L:6370531..6370534    | 4 bp                          |                                 |
| 2L063.2  | 2L:6799638..6799639    | 2 bp                          |                                 |
| 2L063.18 | 2L:68002660..68002670  | 11 bp                         | confirmed "PLP"-Assay available |
| 2L069    | 2L:7729596             | 10 bp                         |                                 |
| 2L072.2  | 2L:8032241             | 2 bp                          |                                 |
| 2L072.23 | 2L:8032695             | 5 bp                          |                                 |
| 2L075    | 2L:8566907..8566915    | 5 bp                          |                                 |
| 2L077.8  | 2L:8942750             | 1 bp                          |                                 |
| 2L077.10 | 2L:8942850             | 2 bp                          |                                 |
| 2L079    | 2L:9205252             | 1 bp                          |                                 |
| 2L081.21 | 2L:9338427             | 1 bp                          |                                 |
| 2L081.23 | 2L:9338437             | 12 bp                         | confirmed "PLP"-Assay available |
| 2L082.10 | 2L:7264579             | 4 bp                          |                                 |
| 2L082.11 | 2L:7264580             | 1 bp                          |                                 |
| 2L083    | 2L:9465292             | 2 bp                          |                                 |
| 2L084.2  | 2L:9595500..9595668    | 169 bp                        | confirmed "PLP"-Assay available |
| 2L084.12 | 2L:9595750             | 1 bp                          |                                 |
| 2L084.20 | 2L:9595772             | 1 bp                          |                                 |
| 2L085.3  | 2L:9626161             | 4 bp                          |                                 |
| 2L085.4  | 2L:9626162             | 1 bp                          |                                 |
| 2L085.5  | 2L:9626163             | 1 bp                          |                                 |
| 2L085.7  | 2L:9626174             | 5 bp                          |                                 |
| 2L085.12 | 2L:9626251             | 1 bp                          |                                 |
| 2L086.3  | 2L:9716185..9716186    | 2 bp                          |                                 |
| 2L086.4  | 2L:9716194             | 1 bp                          |                                 |
| 2L086.5  | 2L:9716261             | 10 bp                         | confirmed "PLP"-Assay available |
| 2L086.14 | 2L:9716868             | 4 bp                          |                                 |
| 2L088    | 2L:9835432             | 5 bp                          |                                 |
| 2L089    | 2L:99424412            | 1 bp                          |                                 |
| 2L090    | 2L:10076997            | 1 bp                          |                                 |
| 2L093    | 2L:10435401..10435415  | 16 bp                         |                                 |
| 2L095.9  | 2L:10772536            | 4 bp                          |                                 |
| 2L095.21 | 2L:10773334            | 1 bp                          |                                 |
| 2L097    | 2L:10949445            | 1 bp                          |                                 |
| 2L098    | 2L:11018242            | 6 bp                          |                                 |
| 2L104.6  | 2L:11491287            | 1 bp                          |                                 |
| 2L104.15 | 2L:11491789            | 1 bp                          |                                 |
| 2L112.50 | 2L:12107858            | 1 bp                          |                                 |
| 2L112.59 | 2L:12108346..12108350  | 5 bp                          |                                 |
| 2L113    | 2L:12232795            | 1 bp                          |                                 |
| 2L115    | 2L:12453638            | 1 bp                          |                                 |
| 2L117.4  | 2L:12600329            | 1 bp                          |                                 |
| 2L117.5  | 2L:12600330            | 1 bp                          |                                 |
| 2L117.7  | 2L:12600430            | 1 bp                          |                                 |
| 2L118    | 2L:12763814..12763815, | 2 bp                          |                                 |
| 2L119    | 2L:12921658            | 11 bp                         |                                 |
| 2L120    | 2L:13092911            | 113 bp                        | confirmed "PLP"-Assay available |
| 2L123.3  | 2L:13655090..13655093  | 4 bp                          |                                 |
| 2L123.4  | 2L:13655095..13655097  | 3 bp                          |                                 |
| 2L123.8  | 2L:13655130            | 1 bp                          |                                 |
| 2L123.19 | 2L:13655247            | 6 bp                          |                                 |
| 2L123.22 | 2L:13655254            | 4 bp                          |                                 |
| 2L123.25 | 2L:13655257            | 1 bp                          |                                 |
| 2L123.26 | 2L:13655259            | 4 bp                          |                                 |
| 2L123.27 | 2L:13655263            | 1 bp                          |                                 |
| 2L123.29 | 2L:13655824            | 2 bp                          |                                 |
| 2L124.3  | 2L:13707262            | 11 bp                         |                                 |
| 2L124.4  | 2L:13707284            | 1 bp                          |                                 |
| 2L124.5  | 2L:13707292            | 1 bp                          |                                 |
| 2L124.7  | 2L:13707301            | 1 bp                          |                                 |
| 2L124.8  | 2L:13707303            | 1 bp                          |                                 |
| 2L124.10 | 2L:13707331            | 6 bp                          |                                 |
| 2L125.6  | 2L:13820300..13820314  | 15 bp                         | confirmed "PLP"-Assay available |
| 2L125.7  | 2L:13820406..13820407  | 2 bp                          |                                 |
| 2L125.14 | 2L:13820746..13820747  | 2 bp                          |                                 |
| 2L130.4  | 2L:14463995            | 1 bp                          |                                 |
| 2L130.7  | 2L:14464316            | 1 bp                          |                                 |
| 2L133    | 2L:15078246            | 1 bp                          |                                 |
| 2L136    | 2L:15285680            | 1 bp                          |                                 |
| 2L137    | 2L:15390931            | 1 bp                          |                                 |
| 2L139.5  | 2L:15687662..1568766   | 5 bp                          |                                 |
| 2L139.9  | 2L:15687816..15687817  | 2 bp                          |                                 |
| 2L139.22 | 2L:15688080            | 2 bp                          |                                 |
| 2L142.4  | 2L:16176802            | 1 bp                          |                                 |
| 2L142.7  | 2L:16176931            | 3 bp                          |                                 |

|          |                       |       |                                 |
|----------|-----------------------|-------|---------------------------------|
| 2L142.8  | 2L:16176933           | 1 bp  |                                 |
| 2L142.9  | 2L:16176934           | 1 bp  |                                 |
| 2L142.10 | 2L:16176941           | 1 bp  |                                 |
| 2L142.12 | 2L:16176948           | 1 bp  |                                 |
| 2L142.20 | 2L:16177068           | 3 bp  |                                 |
| 2L142.26 | 2L:16177083           | 1 bp  |                                 |
| 2L142.29 | 2L:16177090           | 1 bp  |                                 |
| 2L142.33 | 2L:16177106           | 2 bp  |                                 |
| 2L142.35 | 2L:16177108           | 3 bp  |                                 |
| 2L142.37 | 2L:16177186           | 1 bp  |                                 |
| 2L142.38 | 2L:16177188           | 1 bp  |                                 |
| 2L143    | 2L:16311124..16311141 | 18 bp |                                 |
| 2L145.4  | 2L:16569653..16569657 | 5 bp  |                                 |
| 2L145.16 | 2L:16569748           | 1 bp  |                                 |
| 2L145.17 | 2L:16569750           | 1 bp  |                                 |
| 2L145.18 | 2L:16569752           | 3 bp  |                                 |
| 2L145.21 | 2L:16569763           | 1 bp  |                                 |
| 2L145.22 | 2L:16569765           | 6 bp  |                                 |
| 2L145.30 | 2L:16569848           | 1 bp  |                                 |
| 2L145.31 | 2L:16569850           | 1 bp  |                                 |
| 2L145.32 | 2L:16569852           | 1 bp  |                                 |
| 2L145.43 | 2L:16570205           | 1 bp  |                                 |
| 2L147.1  | 2L:16697027..16697038 | 12 bp | confirmed "PLP"-Assay available |
| 2L147.2  | 2L:16697107..16697108 | 2 bp  |                                 |
| 2L147.3  | 2L:16697116..16697140 | 25 bp | confirmed "PLP"-Assay available |
| 2L149    | 2L:16826201..16826207 | 7 bp  |                                 |
| 2L150    | 2L:16954176..16954177 | 2 bp  |                                 |
| 2L167    | 2L:18328150           | 1 bp  |                                 |
| 2L169    | 2L:18450599           | 1 bp  |                                 |
| 2L175    | 2L:18962692           | 1 bp  |                                 |
| 2L185.1  | 2L:19553279..19553285 | 7 bp  | confirmed "PLP"-Assay available |
| 2L185.2  | 2L:19553374..19553379 | 6 bp  |                                 |
| 2L186.2  | 2L:19573326           | 1 bp  |                                 |
| 2L186.7  | 2L:19573386           | 1 bp  |                                 |
| 2L187.5  | 2L:19666829           | 1 bp  |                                 |
| 2L187.7  | 2L:19666901..19666904 | 4 bp  |                                 |
| 2L187.14 | 2L:19667379           | 1 bp  |                                 |
| 2L189.1  | 2L:20016919           | 8 bp  | confirmed "PLP"-Assay available |
| 2L189.4  | 2L:20017732           | 1 bp  |                                 |
| 2L198    | 2L:21077724           | 1 bp  |                                 |
| 2L199    | 2L:21209718           | 3 bp  |                                 |
| 2R006    | 2R:3099968            | 1 bp  |                                 |
| 2R008    | 2R:3393756            | 12 bp | confirmed "PLP"-Assay available |
| 2R011    | 2R:3668022            | 1 bp  |                                 |
| 2R013    | 2R:4018842            | 1 bp  |                                 |
| 2R017    | 2R:4570108..4570123   | 10 bp |                                 |
| 2R020    | 2R:4997880            | 1 bp  |                                 |
| 2R021    | 2R:5138120            | 1 bp  |                                 |
| 2R023    | 2R:5402665            | 1 bp  |                                 |
| 2R027.2  | 2R:5679231            | 2 bp  |                                 |
| 2R027.4  | 2R:5679376            | 2 bp  |                                 |
| 2R028    | 2R:5781425            | 4 bp  |                                 |
| 2R029    | 2R:5929226            | 2 bp  |                                 |
| 2R032.11 | 2R:6438030            | 1 bp  |                                 |
| 2R032.12 | 2R:6438045            | 1 bp  |                                 |
| 2R032.15 | 2R:6438055            | 2 bp  |                                 |
| 2R033.22 | 2R:6546302..6546305   | 4 bp  |                                 |
| 2R033.24 | 2R:6546312..6546314   | 3 bp  |                                 |
| 2R034    | 2R:6659531            | 1 bp  |                                 |
| 2R036.5  | 2R:6899192..6899194   | 3 bp  |                                 |
| 2R036.6  | 2R:6899196..6899197   | 2 bp  |                                 |
| 2R036.7  | 2R:6899199..6899201   | 3 bp  |                                 |
| 2R038.3  | 2R:7147742            | 1 bp  |                                 |
| 2R038.4  | 2R:7147745..7147746   | 2 bp  |                                 |
| 2R039    | 2R:7269311..7269326   | 16 bp |                                 |
| 2R041.1  | 2R:7345919..7345921   | 3 bp  |                                 |
| 2R041.5  | 2R:7346093..7346095   | 3 bp  |                                 |
| 2R042.4  | 2R:7446339            | 2 bp  |                                 |
| 2R042.11 | 2R:7446543..7446551   | 9 bp  |                                 |
| 2R042.15 | 2R:7446936            | 1 bp  |                                 |
| 2R044.3  | 2R:7544901..7544903   | 3 bp  |                                 |
| 2R044.5  | 2R:7545110..7545111   | 2 bp  |                                 |
| 2R046    | 2R:7662361..7662370   | 10 bp | confirmed "PLP"-Assay available |
| 2R049    | 2R:7840372            | 1 bp  |                                 |
| 2R051    | 2R:8076818            | 2 bp  |                                 |
| 2R054.1  | 2R:8525353            | 1 bp  |                                 |
| 2R054.26 | 2R:8526187            | 5 bp  |                                 |
| 2R054.27 | 2R:8526205            | 1 bp  |                                 |
| 2R056    | 2R:8857453..8857454   | 2 bp  |                                 |
| 2R057    | 2R:8963680..8963682   | 3 bp  |                                 |
| 2R058    | 2R:8994637            | 1 bp  |                                 |
| 2R060    | 2R:9182288..9182293   | 6 bp  |                                 |
| 2R061    | 2R:9287474            | 1 bp  |                                 |
| 2R064    | 2R:9687965..9687966   | 2 bp  |                                 |
| 2R067    | 2R:10022333           | 1 bp  |                                 |
| 2R068    | 2R:10140014..10140021 | 8 bp  |                                 |
| 2R072    | 2R:10528095           | 1 bp  |                                 |
| 2R073    | 2R:10618248           | 1 bp  |                                 |
| 2R075    | 2R:10856817           | 1 bp  |                                 |
| 2R076.4  | 2R:10974423           | 8 bp  |                                 |
| 2R076.7  | 2R:10974699           | 1 bp  |                                 |
| 2R076.10 | 2R:10974758..10974759 | 2 bp  |                                 |
| 2R076.23 | 2R:10975177           | 1 bp  |                                 |
| 2R081.5  | 2R:11530312           | 1 bp  |                                 |
| 2R081.6  | 2R:11530326           | 1 bp  |                                 |
| 2R081.8  | 2R:11530339..11530342 | 4 bp  |                                 |
| 2R083    | 2R:11749438..11749448 | 11 bp |                                 |
| 2R087.3  | 2R:12093105           | 2 bp  |                                 |
| 2R087.4  | 2R:12093124           | 6 bp  |                                 |
| 2R087.5  | 2R:12093348           | 4 bp  |                                 |
| 2R088.1  | 2R:12179149           | 2 bp  |                                 |
| 2R088.2  | 2R:12179157           | 1 bp  |                                 |
| 2R088.6  | 2R:12179766..12179769 | 4 bp  |                                 |
| 2R088.7  | 2R:12179786           | 1 bp  |                                 |
| 2R090    | 2R:12466118           | 1 bp  |                                 |
| 2R094.20 | 2R:12919255           | 4 bp  |                                 |
| 2R094.22 | 2R:12919320..12919327 | 8 bp  | confirmed "PLP"-Assay available |

|          |                       |       |                                 |
|----------|-----------------------|-------|---------------------------------|
| 2R096    | 2R:13256954           | 29 bp |                                 |
| 2R097.9  | 2R:13372294..13372296 | 3 bp  | confirmed "PLP"-Assay available |
| 2R097.13 | 2R:13372555           | 5 bp  | confirmed "PLP"-Assay available |
| 2R097.14 | 2R:13372556           | 3 bp  |                                 |
| 2R097.15 | 2R:13372559           | 3 bp  |                                 |
| 2R101.4  | 2R:13992673..13992677 | 3 bp  |                                 |
| 2R101.12 | 2R:13992904           | 1 bp  |                                 |
| 2R101.13 | 2R:13992905           | 1 bp  |                                 |
| 2R104    | 2R:14436207           | 1 bp  |                                 |
| 2R107.4  | 2R:14933268..14933280 | 13 bp |                                 |
| 2R107.12 | 2R:14933482..14933485 | 4 bp  |                                 |
| 2R109    | 2R:15200071..15200083 | 11 bp |                                 |
| 2R111.5  | 2R:15313752           | 1 bp  |                                 |
| 2R111.18 | 2R:15314122..15314136 | 14 bp | confirmed "PLP"-Assay available |
| 2R111.23 | 2R:15314419           | 1 bp  |                                 |
| 2R114    | 2R:15541095..15541105 | 11 bp |                                 |
| 2R116.3  | 2R:15823034           | 1 bp  |                                 |
| 2R116.7  | 2R:15823109           | 3 bp  |                                 |
| 2R117.2  | 2R:15840311..15840318 | 8 bp  | confirmed "PLP"-Assay available |
| 2R117.11 | 2R:15840906           | 1 bp  |                                 |
| 2R117.12 | 2R:15840976           | 2 bp  |                                 |
| 2R118    | 2R:16117998           | 2 bp  |                                 |
| 2R119.12 | 2R:16154421           | 2 bp  |                                 |
| 2R119.15 | 2R:16154530           | 1 bp  |                                 |
| 2R120.1  | 2R:16261681           | 4 bp  |                                 |
| 2R120.2  | 2R:16261689           | 8 bp  | confirmed "PLP"-Assay available |
| 2R120.8  | 2R:16262221           | 9 bp  |                                 |
| 2R124    | 2R:16841016           | 14 bp |                                 |
| 2R125.2  | 2R:16985241           | 1 bp  |                                 |
| 2R125.12 | 2R:16985523           | 1 bp  |                                 |
| 2R128    | 2R:17275552           | 1 bp  |                                 |
| 2R130    | 2R:17944415           | 9 bp  |                                 |
| 2R134.3  | 2R:18395540..18395572 | 33 bp | confirmed "PLP"-Assay available |
| 2R134.5  | 2R:18395602           | 1 bp  |                                 |
| 2R134.10 | 2R:18395949           | 1 bp  |                                 |
| 2R139    | 2R:18613351           | 18 bp |                                 |
| 2R140    | 2R:18627214..18627219 | 6 bp  |                                 |
| 2R141.4  | 2R:18641638           | 5 bp  |                                 |
| 2R141.5  | 2R:18641698..18641700 | 3 bp  |                                 |
| 2R141.8  | 2R:18641921           | 3 bp  |                                 |
| 2R143    | 2R:18979211           | 5 bp  |                                 |
| 2R145    | 2R:19189216           | 1 bp  |                                 |
| 2R146    | 2R:19309208..19309211 | 4 bp  |                                 |
| 2R147    | 2R:19435767           | 4 bp  |                                 |
| 2R150    | 2R:19891477           | 3 bp  |                                 |
| 3L009    | 3L:1862477..1862480   | 5 bp  |                                 |
| 3L013    | 3L:8817743            | 1 bp  |                                 |
| 3L015.7  | 3L:2448419            | 2 bp  |                                 |
| 3L015.9  | 3L:2448481            | 1 bp  |                                 |
| 3L015.12 | 3L:2448664            | 3 bp  |                                 |
| 3L015.13 | 3L:2448666            | 6 bp  |                                 |
| 3L021    | 3L:2808041            | 12 bp |                                 |
| 3L022    | 3L:2862110..2862121   | 11 bp | confirmed "PLP"-Assay available |
| 3L023    | 3L:2907068            | 1 bp  |                                 |
| 3L025.1  | 3L:3012192            | 1 bp  |                                 |
| 3L025.10 | 3L:3012361            | 4 bp  |                                 |
| 3L025.14 | 3L:3012384            | 2 bp  |                                 |
| 3L025.15 | 3L:3012714            | 1 bp  |                                 |
| 3L026    | 3L:3090357            | 13 bp | confirmed "PLP"-Assay available |
| 3L030    | 3L:3542647            | 3 bp  |                                 |
| 3L031    | 3L:3757025            | 19 bp |                                 |
| 3L033    | 3L:3973466            | 1 bp  |                                 |
| 3L034.2  | 3L:4202140            | 1 bp  |                                 |
| 3L034.3  | 3L:4202471            | 1 bp  |                                 |
| 3L035.2  | 3L:4319550            | 1 bp  |                                 |
| 3L035.4  | 3L:4319563            | 4 bp  |                                 |
| 3L035.6  | 3L:4319929..4319934   | 6 bp  |                                 |
| 3L035.8  | 3L:4319957            | 1 bp  |                                 |
| 3L035.13 | 3L:4320346..53        | 8 bp  |                                 |
| 3L035.19 | 3L:4320412..4320418   | 7 bp  |                                 |
| 3L035.21 | 3L:4320544            | 17 bp |                                 |
| 3L035.24 | 3L:4320572            | 1 bp  |                                 |
| 3L036    | 3L:4420492..4420497   | 6 bp  |                                 |
| 3L037.2  | 3L:4616760..4616765   | 6 bp  |                                 |
| 3L037.3  | 3L:4616772..4616815   | 45 bp | confirmed "PLP"-Assay available |
| 3L037.7  | 3L:4616995            | 1 bp  |                                 |
| 3L037.8  | 3L:4617130            | 25 bp | confirmed "PLP"-Assay available |
| 3L037.16 | 3L:4617197            | 11 bp |                                 |
| 3L039    | 3L:3889000            | 1 bp  |                                 |
| 3L041    | 3L:5182778..5182806   | 28 bp |                                 |
| 3L043    | 3L:5363727            | 4 bp  |                                 |
| 3L045    | 3L:5540352            | 1 bp  |                                 |
| 3L048.5  | 3L:5853416            | 3 bp  |                                 |
| 3L048.11 | 3L:5853425            | 3 bp  |                                 |
| 3L048.14 | 3L:5853481            | 4 bp  |                                 |
| 3L048.18 | 3L:5853521            | 1 bp  |                                 |
| 3L048.27 | 3L:5854035            | 2 bp  |                                 |
| 3L048.28 | 3L:5854048            | 2 bp  |                                 |
| 3L052    | 3L:6079860..6079861   | 2 bp  |                                 |
| 3L056    | 3L:6392307            | 1 bp  |                                 |
| 3L057    | 3L:6472326            | 1 bp  |                                 |
| 3L058    | 3L:6563733            | 11 bp |                                 |
| 3L059.4  | 3L:6662154..6662156   | 3 bp  | confirmed "PLP"-Assay available |
| 3L059.5  | 3L:6662158            | 1 bp  |                                 |
| 3L059.6  | 3L:6662161            | 1 bp  |                                 |
| 3L059.7  | 3L:6662164..6662166   | 3 bp  |                                 |
| 3L060.9  | 3L:6745384            | 1 bp  |                                 |
| 3L060.14 | 3L:6745396            | 2 bp  |                                 |
| 3L063.4  | 3L:6928344            | 1 bp  |                                 |
| 3L063.9  | 3L:6928446            | 1 bp  |                                 |
| 3L064    | 3L:7023027..7023047   | 21 bp |                                 |
| 3L066.9  | 3L:7390780..7390784   | 5 bp  |                                 |
| 3L066.10 | 3L:7390786            | 1 bp  |                                 |
| 3L070.2  | 3L:7765049            | 3 bp  |                                 |
| 3L070.3  | 3L:7765066..7765073   | 8 bp  |                                 |
| 3L072.15 | 3L:7869508            | 1 bp  |                                 |
| 3L072.16 | 3L:7869517            | 1 bp  |                                 |
| 3L072.18 | 3L:7869519            | 1 bp  |                                 |

|          |                        |       |                                 |
|----------|------------------------|-------|---------------------------------|
| 3L073.1  | 3L:7948541             | 12 bp | confirmed "PLP"-Assay available |
| 3L073.10 | 3L:7949231             | 1 bp  |                                 |
| 3L076    | 3L:8220866..8220869    | 4 bp  |                                 |
| 3L077    | 3L:8382141             | 26 bp | confirmed "PLP"-Assay available |
| 3L079    | 3L:8663494             | 1 bp  |                                 |
| 3L083    | 3L:9257026             | 5 bp  |                                 |
| 3L084    | 3L:9396606             | 2 bp  |                                 |
| 3L086    | 3L:9701769             | 15 bp |                                 |
| 3L088    | 3L:10005193            | 1 bp  |                                 |
| 3L089    | 3L:10158269            | 1 bp  |                                 |
| 3L090    | 3L:10271526            | 1 bp  |                                 |
| 3L093.1  | 3L:10500538            | 1 bp  |                                 |
| 3L093.4  | 3L:10500551            | 2 bp  |                                 |
| 3L093.36 | 3L:10501189            | 1 bp  |                                 |
| 3L093.38 | 3L:10501260            | 3 bp  |                                 |
| 3L094    | 3L:10614419..10614428  | 10 bp |                                 |
| 3L095.2  | 3L:10766245            | 1 bp  |                                 |
| 3L095.7  | 3L:10766484            | 1 bp  |                                 |
| 3L095.17 | 3L:10766657            | 4 bp  |                                 |
| 3L098.2  | 3L:11375746..11375749  | 4 bp  |                                 |
| 3L098.11 | 3L:11375912            | 6 bp  |                                 |
| 3L098.13 | 3L:11375917            | 1 bp  |                                 |
| 3L098.16 | 3L:11375964..11375980  | 17 bp |                                 |
| 3L098.17 | 3L:11375986..11376070  | 85 bp | confirmed "PLP"-Assay available |
| 3L098.19 | 3L:11376092            | 2 bp  |                                 |
| 3L098.23 | 3L:11376217            | 1 bp  |                                 |
| 3L098.25 | 3L:11376220            | 2 bp  |                                 |
| 3L098.26 | 3L:11376275            | 2 bp  |                                 |
| 3L098.41 | 3L:11376622..11376642  | 21 bp | confirmed "PLP"-Assay available |
| 3L098.45 | 3L:11376702..11376709  | 8 bp  |                                 |
| 3L098.47 | 3L:11376715..11376722  | 8 bp  |                                 |
| 3L098.48 | 3L:11376728..11376730  | 3 bp  |                                 |
| 3L104.5  | 3L:12050159..12050160  | 2 bp  |                                 |
| 3L104.6  | 3L:12050186            | 1 bp  |                                 |
| 3L104.9  | 3L:12050194            | 1 bp  |                                 |
| 3L105    | 3L:12442330..124423346 | 17 bp |                                 |
| 3L113.4  | 3L:13122727..13122738  | 12 bp | confirmed "PLP"-Assay available |
| 3L113.8  | 3L:13122959            | 1 bp  |                                 |
| 3L115.9  | 3L:13350356            | 1 bp  |                                 |
| 3L115.11 | 3L:13350388..13350416  | 29 bp | confirmed "PLP"-Assay available |
| 3L115.17 | 3L:13350490            | 10 bp |                                 |
| 3L115.18 | 3L:13350495            | 21 bp |                                 |
| 3L115.25 | 3L:13350552            | 1 bp  |                                 |
| 3L115.33 | 3L:13350576            | 1 bp  |                                 |
| 3L115.35 | 3L:13350612            | 1 bp  |                                 |
| 3L115.36 | 3L:13350616            | 3 bp  |                                 |
| 3L115.38 | 3L:13350622            | 2 bp  |                                 |
| 3L115.39 | 3L:13350624            | 1 bp  |                                 |
| 3L116    | 3L:13477759            | 13 bp | confirmed "PLP"-Assay available |
| 3L118.7  | 3L:13738397            | 1 bp  |                                 |
| 3L118.11 | 3L:13738711            | 1 bp  |                                 |
| 3L118.13 | 3L:13738743            | 1 bp  |                                 |
| 3L119.25 | 3L:13885697            | 1 bp  |                                 |
| 3L119.26 | 3L:13885705            | 1 bp  |                                 |
| 3L120.7  | 3L:14009133..14009134  | 2 bp  |                                 |
| 3L120.9  | 3L:14009138..14009143  | 6 bp  |                                 |
| 3L120.12 | 3L:14009251            | 1 bp  |                                 |
| 3L120.13 | 3L:14009281            | 1 bp  |                                 |
| 3L120.14 | 3L:14009291..14009292  | 2 bp  |                                 |
| 3L120.15 | 3L:14009313..14009323  | 11 bp | confirmed "PLP"-Assay available |
| 3L121.6  | 3L:14291187            | 1 bp  |                                 |
| 3L121.7  | 3L:14291377..14291381  | 5 bp  |                                 |
| 3L124    | 3L:14690818..14690822  | 5 bp  |                                 |
| 3L125.5  | 3L:14851835..14851836  | 2 bp  |                                 |
| 3L125.7  | 3L:14851949..14851965  | 17 bp | confirmed "PLP"-Assay available |
| 3L126.2  | 3L:15134444            | 1 bp  |                                 |
| 3L126.9  | 3L:15134451            | 4 bp  |                                 |
| 3L126.10 | 3L:15134452            | 3 bp  |                                 |
| 3L126.11 | 3L:15134455            | 9 bp  |                                 |
| 3L127    | 3L:15416175..15416186  | 12 bp |                                 |
| 3L128.1  | 3L:15556606            | 2 bp  |                                 |
| 3L128.3  | 3L:15556878            | 1 bp  |                                 |
| 3L130.2  | 3L:15815682            | 1 bp  |                                 |
| 3L130.4  | 3L:15815766            | 1 bp  |                                 |
| 3L130.5  | 3L:15815805            | 6 bp  |                                 |
| 3L135.2  | 3L:16357228            | 1 bp  |                                 |
| 3L135.9  | 3L:16358179            | 6 bp  |                                 |
| 3L137.2  | 3L:16605243            | 2 bp  |                                 |
| 3L137.3  | 3L:16605249            | 4 bp  |                                 |
| 3L137.4  | 3L:16605255            | 2 bp  |                                 |
| 3L137.6  | 3L:16605453            | 1 bp  |                                 |
| 3L140    | 3L:16721765            | 1 bp  |                                 |
| 3L148    | 3L:17527516..17527520  | 5 bp  |                                 |
| 3L158    | 3L:18316764            | 1 bp  |                                 |
| 3L159    | 3L:18497857            | 1 bp  |                                 |
| 3L163.9  | 3L:18871643            | 1 bp  |                                 |
| 3L163.15 | 3L:18871947            | 2 bp  |                                 |
| 3L163.19 | 3L:18871978            | 1 bp  |                                 |
| 3L164    | 3L:1905868             | 1 bp  |                                 |
| 3L165    | 3L:19151190            | 3 bp  |                                 |
| 3L166    | 3L:19241268            | 2 bp  |                                 |
| 3L167    | 3L:19244958            | 1 bp  |                                 |
| 3L169.1  | 3L:19432263            | 2 bp  |                                 |
| 3L169.3  | 3L:19432636            | 2 bp  |                                 |
| 3L170.5  | 3L:19625255..19625259  | 5 bp  |                                 |
| 3L170.6  | 3L:19625262            | 1 bp  |                                 |
| 3L170.12 | 3L:19625450            | 3 bp  |                                 |
| 3L171    | 3L:19826748..19826764  | 17 bp | confirmed "PLP"-Assay available |
| 3L173    | 3L:20322167..20322206  | 40 bp | confirmed "PLP"-Assay available |
| 3L177.3  | 3L:20902735..20902737  | 3 bp  |                                 |
| 3L177.4  | 3L:20902739            | 1 bp  |                                 |
| 3L180    | 3L:21476236            | 1 bp  |                                 |
| 3L181    | 3L:21656546            | 3 bp  |                                 |
| 3L183.1  | 3L:22030780            | 1 bp  |                                 |
| 3L183.7  | 3L:22031238            | 1 bp  |                                 |
| 3L184    | 3L:22226259..22226298  | 40 bp |                                 |
| 3L185    | 3L:22583786..22583790  | 5 bp  | confirmed "PLP"-Assay available |

|          |                       |       |                                 |
|----------|-----------------------|-------|---------------------------------|
| 3L186    | 3L:22775660           | 11 bp | confirmed "PLP"-Assay available |
| 3R010    | 3R:1552157..1552165   | 9 bp  |                                 |
| 3R011    | 3R:1599768            | 9 bp  | confirmed "PLP"-Assay available |
| 3R012.3  | 3R:1761135..1761156   | 22 bp | confirmed "PLP"-Assay available |
| 3R012.4  | 3R:1761237..1761245   | 9 bp  |                                 |
| 3R013.1  | 3R:1923170..1923177   | 8 bp  |                                 |
| 3R013.5  | 3R:1923717            | 1 bp  |                                 |
| 3R013.6  | 3R:1923718            | 1 bp  |                                 |
| 3R013.7  | 3R:1923720            | 4 bp  |                                 |
| 3R015    | 3R:2162943..2163000   | 58 bp | confirmed "PLP"-Assay available |
| 3R019    | 3R:2800696            | 1 bp  |                                 |
| 3R020.1  | 3R:2961042            | 1 bp  |                                 |
| 3R020.2  | 3R:2961246            | 1 bp  |                                 |
| 3R023.4  | 3R:3410348            | 2 bp  |                                 |
| 3R023.6  | 3R:3410413            | 1 bp  |                                 |
| 3R026.3  | 3R:3780912            | 1 bp  |                                 |
| 3R026.5  | 3R:3781147            | 4 bp  |                                 |
| 3R029    | 3R:4181507            | 3 bp  |                                 |
| 3R032    | 3R:4672533..4672547   | 15 bp | confirmed "PLP"-Assay available |
| 3R034    | 3R:4985172..4985173   | 2 bp  |                                 |
| 3R035    | 3R:5304873..5304880   | 8 bp  |                                 |
| 3R038    | 3R:5716628..5716629   | 2 bp  |                                 |
| 3R039    | 3R:5796772..5796779   | 8 bp  | confirmed "PLP"-Assay available |
| 3R043.6  | 3R:6279153..6279157   | 5 bp  |                                 |
| 3R043.9  | 3R:6279165            | 6 bp  |                                 |
| 3R045.17 | 3R:6507996..6508001   | 6 bp  |                                 |
| 3R045.22 | 3R:6508585            | 6 bp  |                                 |
| 3R046.5  | 3R:6559253            | 1 bp  |                                 |
| 3R046.7  | 3R:6559254            | 2 bp  |                                 |
| 3R046.11 | 3R:6559447            | 1 bp  |                                 |
| 3R047    | 3R:6759078            | 1 bp  |                                 |
| 3R048    | 3R:6909315            | 1 bp  |                                 |
| 3R050    | 3R:7082702            | 2 bp  |                                 |
| 3R052.6  | 3R:7314541            | 1 bp  |                                 |
| 3R052.7  | 3R:7314548            | 7 bp  |                                 |
| 3R053.15 | 3R:7381669            | 1 bp  |                                 |
| 3R053.16 | 3R:7381836            | 1 bp  |                                 |
| 3R057    | 3R:8054196            | 1 bp  |                                 |
| 3R061    | 3R:8555144..8555151   | 8 bp  |                                 |
| 3R062.1  | 3R:8716124            | 1 bp  |                                 |
| 3R062.2  | 3R:8716134            | 1 bp  |                                 |
| 3R062.5  | 3R:8716328            | 1 bp  |                                 |
| 3R062.9  | 3R:8716465            | 3 bp  |                                 |
| 3R062.10 | 3R:8716563            | 1 bp  |                                 |
| 3R064    | 3R:9036569            | 1 bp  |                                 |
| 3R065    | 3R:9181888..9181919   | 32 bp | confirmed "PLP"-Assay available |
| 3R066.4  | 3R:9355810            | 11 bp | confirmed "PLP"-Assay available |
| 3R066.6  | 3R:9356315            | 1 bp  |                                 |
| 3R066.7  | 3R:9356317            | 1 bp  |                                 |
| 3R068.1  | 3R:9675570            | 1 bp  |                                 |
| 3R068.2  | 3R:9675572            | 1 bp  |                                 |
| 3R068.3  | 3R:9675575            | 4 bp  |                                 |
| 3R068.9  | 3R:9675918            | 2 bp  |                                 |
| 3R070    | 3R:10118729           | 1 bp  |                                 |
| 3R071    | 3R:10158219           | 4 bp  |                                 |
| 3R072    | 3R:10316017           | 1 bp  |                                 |
| 3R074    | 3R:1063037            | 1 bp  |                                 |
| 3R075    | 3R:10795309           | 1 bp  |                                 |
| 3R082.1  | 3R:11589689           | 1 bp  |                                 |
| 3R082.3  | 3R:11590076           | 6 bp  |                                 |
| 3R083.2  | 3R:11753633           | 6 bp  | confirmed "PLP"-Assay available |
| 3R083.3  | 3R:11753634           | 1 bp  |                                 |
| 3R083.4  | 3R:11753636           | 3 bp  |                                 |
| 3R083.5  | 3R:11753637           | 4 bp  |                                 |
| 3R083.8  | 3R:11754132           | 10 bp | confirmed "PLP"-Assay available |
| 3R085    | 3R:12074352..12074364 | 13 bp | confirmed "PLP"-Assay available |
| 3R086    | 3R:12234229..12234237 | 9 bp  | confirmed "PLP"-Assay available |
| 3R090    | 3R:12714059           | 1 bp  |                                 |
| 3R091.2  | 3R:12873878           | 2 bp  |                                 |
| 3R091.4  | 3R:12873960           | 1 bp  |                                 |
| 3R091.13 | 3R:12874178           | 3 bp  |                                 |
| 3R091.27 | 3R:12874396..12874403 | 8 bp  |                                 |
| 3R092    | 3R:13035467           | 35 bp |                                 |
| 3R096    | 3R:13396517           | 1 bp  |                                 |
| 3R105    | 3R:13770858           | 1 bp  |                                 |
| 3R108    | 3R:13914979           | 1 bp  |                                 |
| 3R109    | 3R:13963273           | 1 bp  |                                 |
| 3R118    | 3R:14313562           | 1 bp  |                                 |
| 3R122    | 3R:14763119..14763130 | 12 bp |                                 |
| 3R123.2  | 3R:14793328           | 10 bp |                                 |
| 3R123.4  | 3R:14793415           | 13 bp | confirmed "PLP"-Assay available |
| 3R123.17 | 3R:14793878..14793889 | 12 bp |                                 |
| 3R125    | 3R:14940814           | 2 bp  |                                 |
| 3R127.1  | 3R:14988403..14988411 | 9 bp  |                                 |
| 3R127.13 | 3R:14988677           | 1 bp  |                                 |
| 3R127.22 | 3R:14988787           | 8 bp  |                                 |
| 3R127.26 | 3R:14988823           | 1 bp  |                                 |
| 3R127.31 | 3R:14988977           | 1 bp  |                                 |
| 3R151    | 3R:16242467           | 16 bp |                                 |
| 3R152    | 3R:16279648..16279649 | 2 bp  |                                 |
| 3R156.5  | 3R:16878348           | 1 bp  |                                 |
| 3R156.7  | 3R:16878425           | 1 bp  |                                 |
| 3R156.9  | 3R:16878543           | 1 bp  |                                 |
| 3R156.11 | 3R:16878552           | 1 bp  |                                 |
| 3R156.14 | 3R:16878660..16878677 | 18 bp | confirmed "PLP"-Assay available |
| 3R160    | 3R:17363059           | 1 bp  |                                 |
| 3R162    | 3R:17618247           | 4 bp  |                                 |
| 3R169    | 3R:18484180           | 6 bp  |                                 |
| 3R170    | 3R:18486183           | 1 bp  |                                 |
| 3R171    | 3R:18571156           | 2 bp  |                                 |
| 3R174    | 3R:18763223           | 1 bp  |                                 |
| 3R176    | 3R:19043017           | 1 bp  |                                 |
| 3R186    | 3R:19738651           | 3 bp  |                                 |
| 3R187.5  | 3R:19880268..19880270 | 3 bp  |                                 |
| 3R187.11 | 3R:19880833..19880835 | 3 bp  |                                 |
| 3R192    | 3R:20557003           | 5 bp  |                                 |
| 3R200    | 3R:21622103           | 1 bp  |                                 |
| 3R204    | 3R:22075492           | 10 bp |                                 |
| 3R205    | 3R:22168325           | 1 bp  |                                 |

|          |                       |       |                                 |
|----------|-----------------------|-------|---------------------------------|
| 3R212    | 3R:23452172           | 1 bp  |                                 |
| 3R217.1  | 3R:24093857..24093858 | 2 bp  |                                 |
| 3R217.2  | 3R:24093864..24093866 | 3 bp  |                                 |
| 3R218    | 3R:24255318..24255321 | 4 bp  |                                 |
| 3R221    | 3R:24908015..24908060 | 46 bp |                                 |
| 3R222.20 | 3R:25034769           | 2 bp  |                                 |
| 3R222.22 | 3R:25034973..25034989 | 17 bp | confirmed "PLP"-Assay available |
| 3R224    | 3R:25285450..25285463 | 10 bp |                                 |
| 3R227.10 | 3R:25534538           | 2 bp  |                                 |
| 3R227.11 | 3R:25534539           | 4 bp  |                                 |
| 3R227.14 | 3R:25534611..25534624 | 14 bp | confirmed "PLP"-Assay available |
| 3R228.6  | 3R:25573620..25573621 | 2 bp  |                                 |
| 3R228.9  | 3R:25573624..25573625 | 2 bp  |                                 |
| 3R230    | 3R:25765333..25765341 | 9 bp  |                                 |
| 3R231.1  | 3R:25875660           | 18 bp | confirmed "PLP"-Assay available |
| 3R231.3  | 3R:25876079           | 3 bp  |                                 |
| 3R231.6  | 3R:25876291           | 3 bp  |                                 |
| 3R232    | 3R:25957905           | 11 bp | confirmed "PLP"-Assay available |
| 3R233    | 3R:25997115           | 50 bp | confirmed "PLP"-Assay available |
| 3R236.8  | 3R:26189922           | 1 bp  |                                 |
| 3R236.9  | 3R:26189941           | 14 bp | confirmed "PLP"-Assay available |
| 3R238.5  | 3R:26515872           | 2 bp  |                                 |
| 3R238.6  | 3R:26515881           | 1 bp  |                                 |
| 3R238.21 | 3R:26516008..26516077 | 70 bp | confirmed "PLP"-Assay available |
| 3R238.23 | 3R:26516134           | 9 bp  | confirmed "PLP"-Assay available |
| 3R244.2  | 3R:27155235           | 1 bp  |                                 |
| 3R244.3  | 3R:27155237           | 2 bp  |                                 |
| 3R244.4  | 3R:27155251..27155259 | 9 bp  |                                 |
| 3R245    | 3R:27189945..27189950 | 6 bp  |                                 |
| 3R246    | 3R:27316459           | 1 bp  |                                 |
| 3R248.3  | 3R:27635556           | 4 bp  |                                 |
| 3R248.4  | 3R:27635558           | 4 bp  |                                 |
| 3R248.5  | 3R:27635559           | 8 bp  |                                 |
| 3R249    | 3R:27766585..27766603 | 19 bp | confirmed "PLP"-Assay available |
